# Supplementary material for: Synthesis and chemosensing properties of cinnoline-containing poly(arylene ethynylene)s
Source: PubMed Central journal article supplement (PMC4419556; doi:10.3762/bjoc.11.43), 2015-03-20
Supplement: Beilstein_J_Org_Chem-11-373-s002.pdf [file Beilstein_J_Org_Chem-11-373-s002.pdf]

## **Supporting Information File 2**

**for**

# **Synthesis and chemosensing properties of cinnoline-containing poly(arylene ethynylene)s**

Natalia A. Danilkina, Petr S. Vlasov, Semen M. Vodianik, Andrey A. Kruchinin, Yuri G. Vlasov, Irina A. Balova\*

Address: Institute of Chemistry, Saint Petersburg State University, Universitetskiy pr. 26, Saint Petersburg, 198504, Russia. Fax:+7(812)4286733

Email: Irina A. Balova\* - balova.irina@chem.spbu.ru

\*Corresponding author

**Copies of  $^1\text{H}$  and  $^{13}\text{C}$  NMR spectra for all compounds, copies of DEPT and 2D NMR spectra for compounds 5a,b and 7, copies of IR spectra for compounds 4a,b; 5,b; 7 and 10a,b, copies of GPC chromatograms for PAEs 10a,b.**

### **Table of contents**

Copies of NMR and IR spectra – S2

Copies of GPC chromatograms – S45

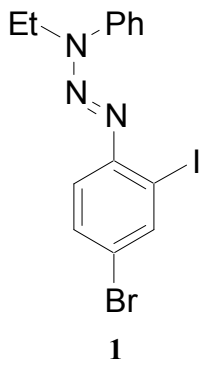

<sup>1</sup>H NMR, 400 MHz

8.06  
8.05  
7.49  
7.38  
7.20  
7.19  
7.17

4.41  
4.39  
4.38  
4.36

1.43  
1.41  
1.40

0.94  
6.03  
1.00

2.05

3.08

ppm 10.0

5.0

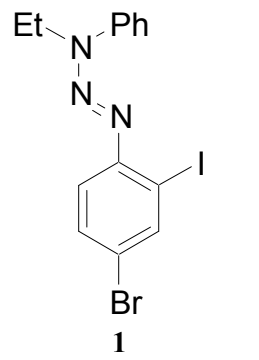

<sup>13</sup>C NMR, 100 MHz

- 148.85
- 143.73
- 140.99
- 131.74
- 129.26
- 124.10
- 119.94
- 118.74
- 117.04
- 98.02
- 41.18
- 10.92

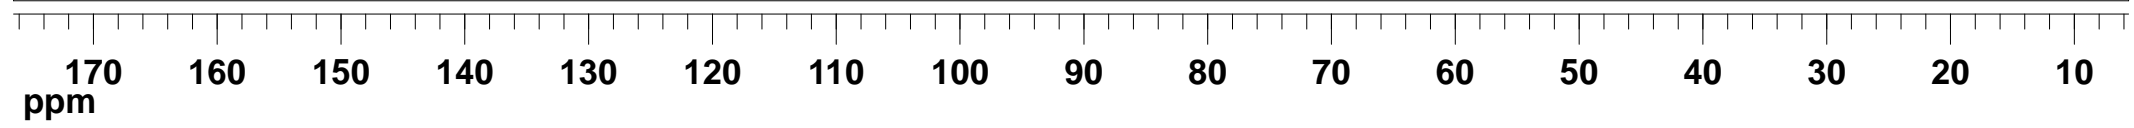

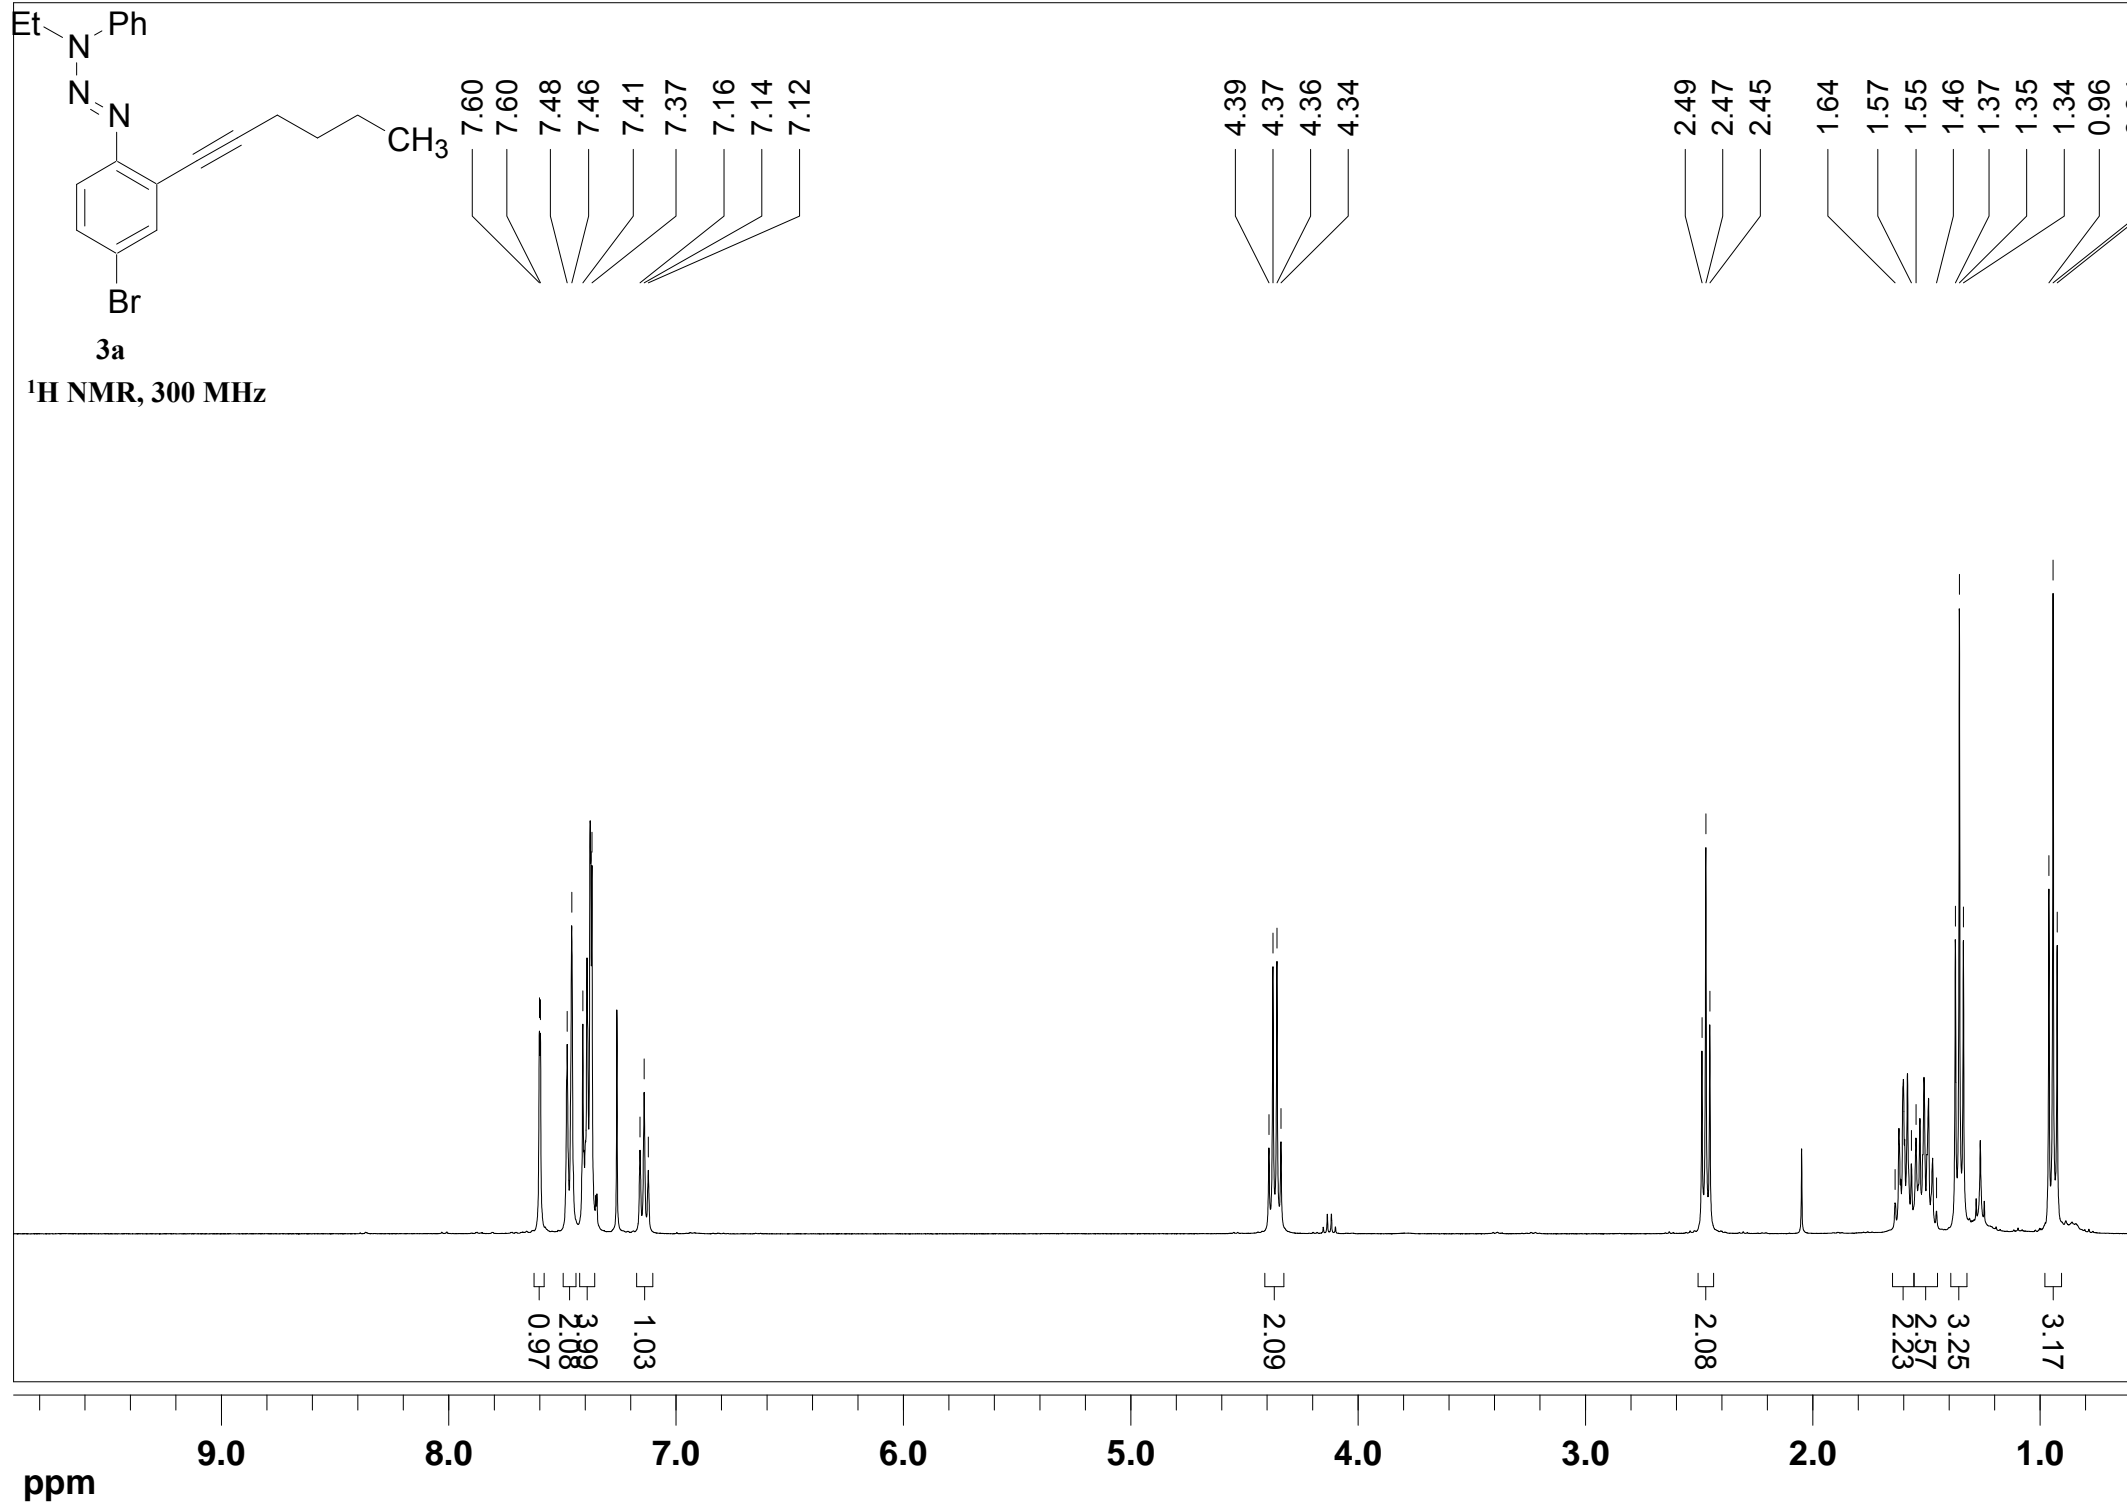

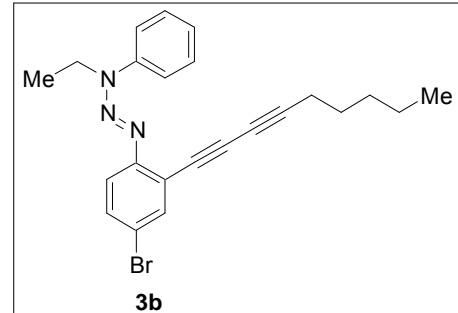

**<sup>1</sup>H NMR, 300 MHz**

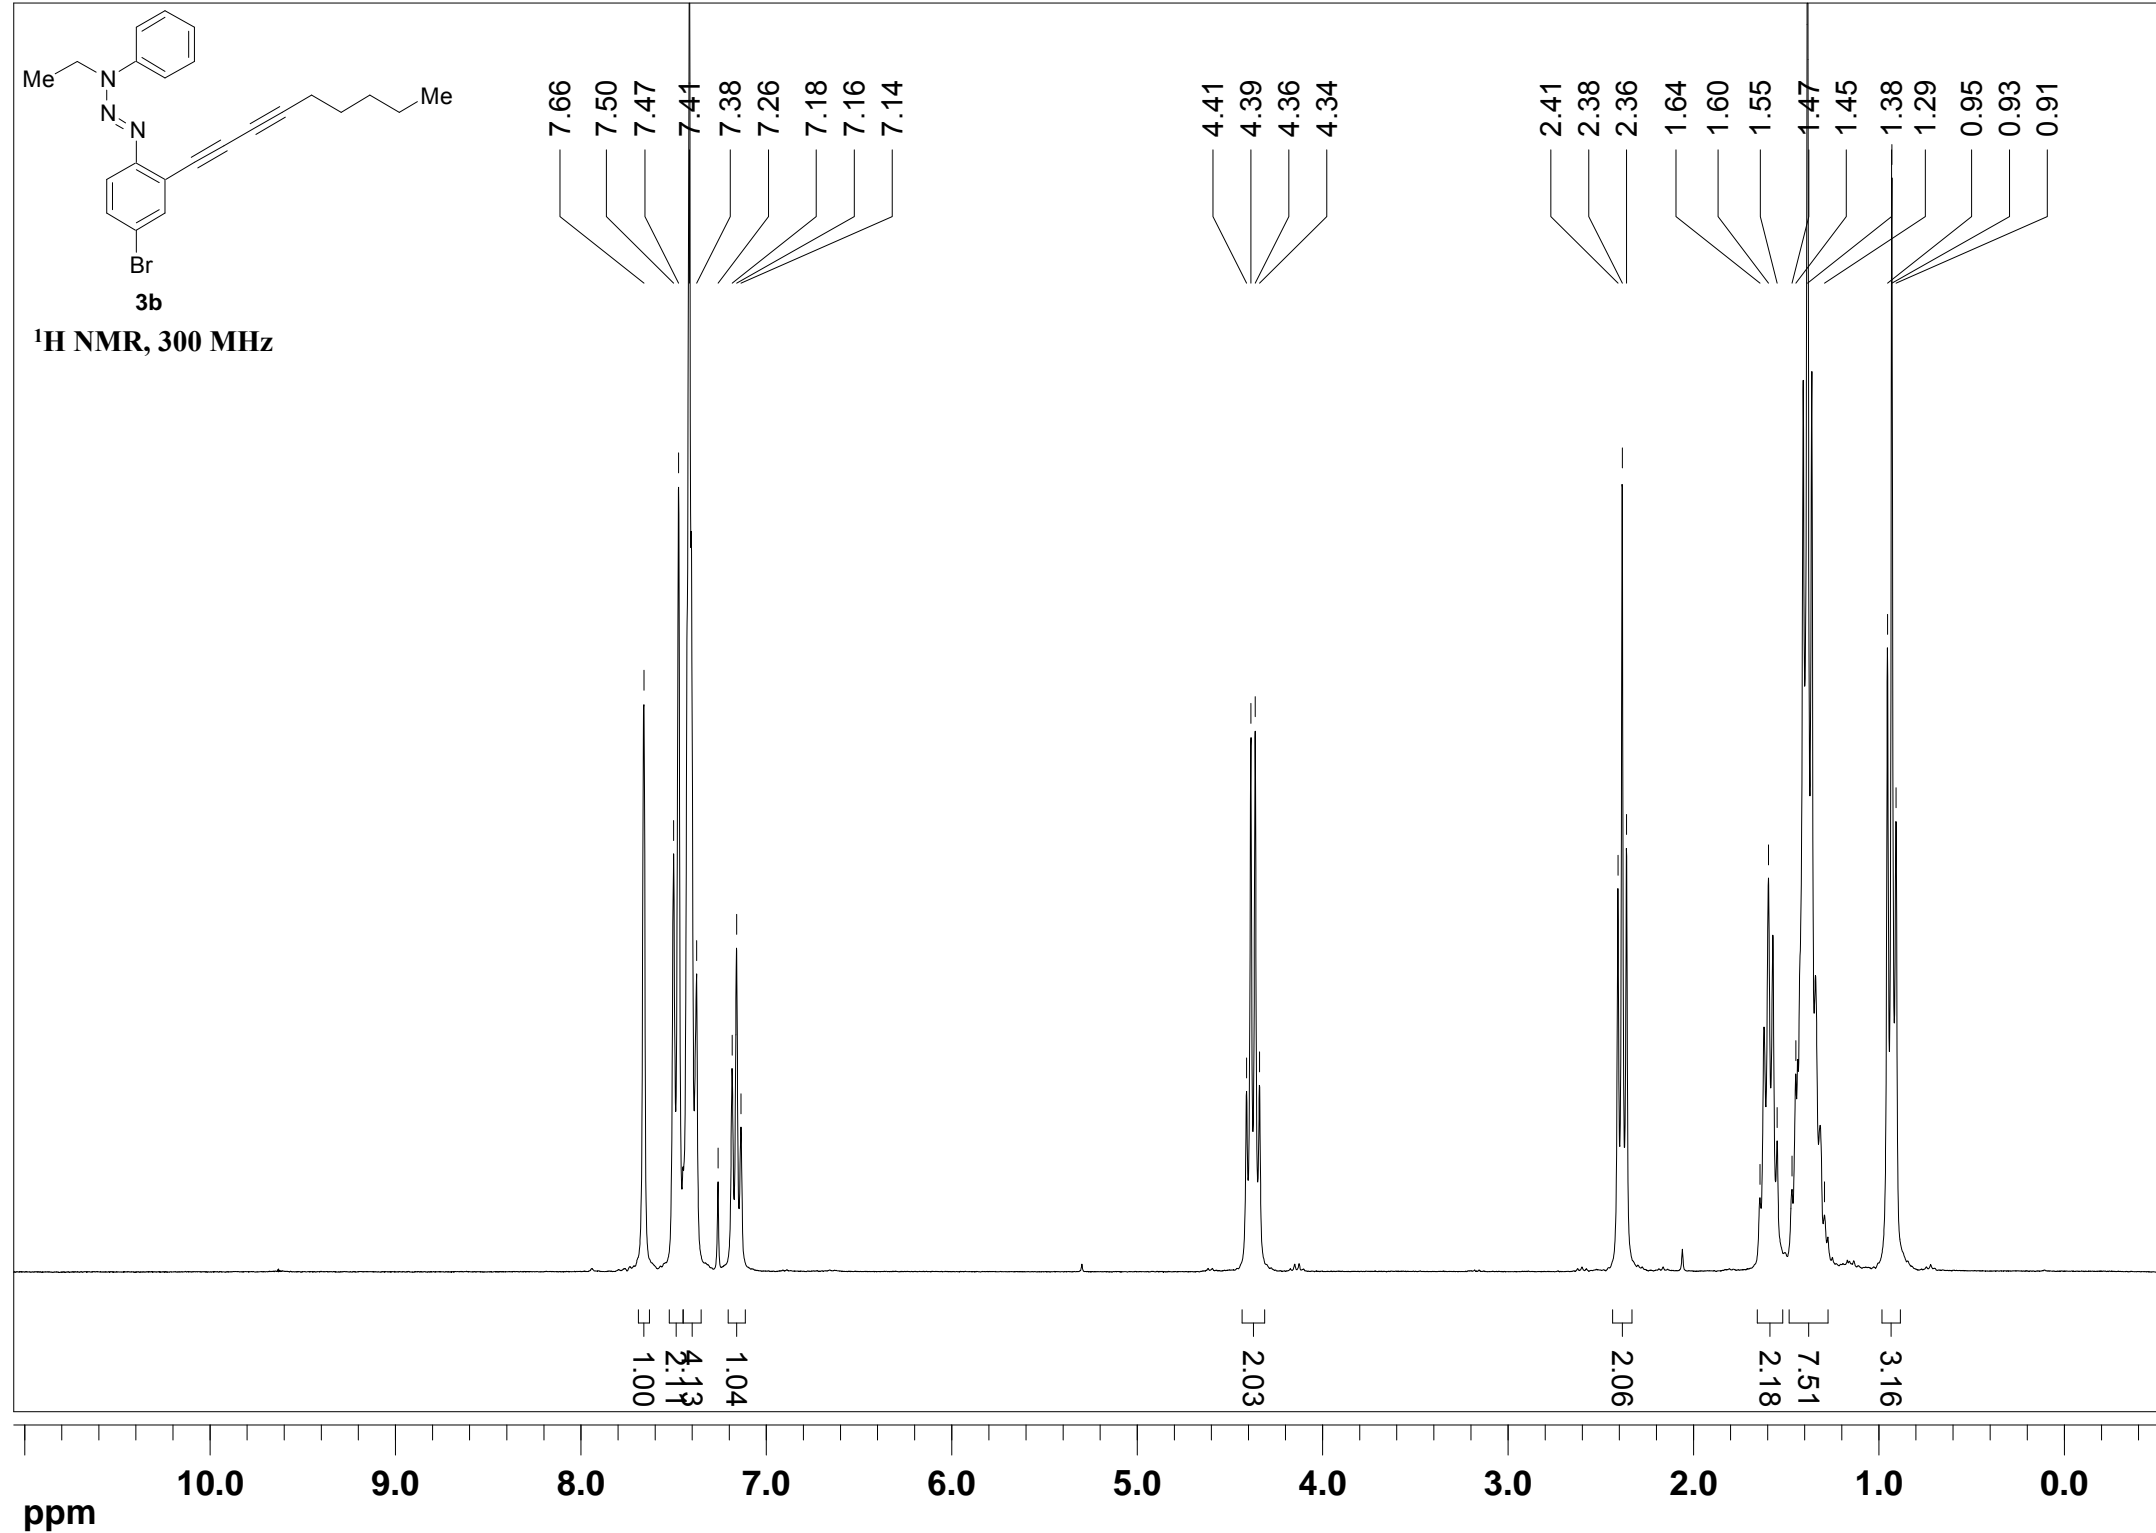

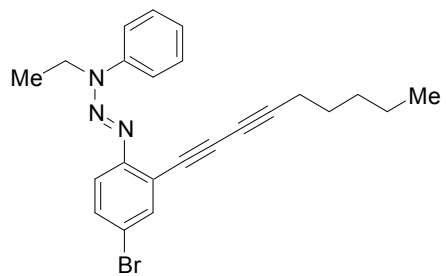

3b

<sup>13</sup>C NMR, 75 MHz

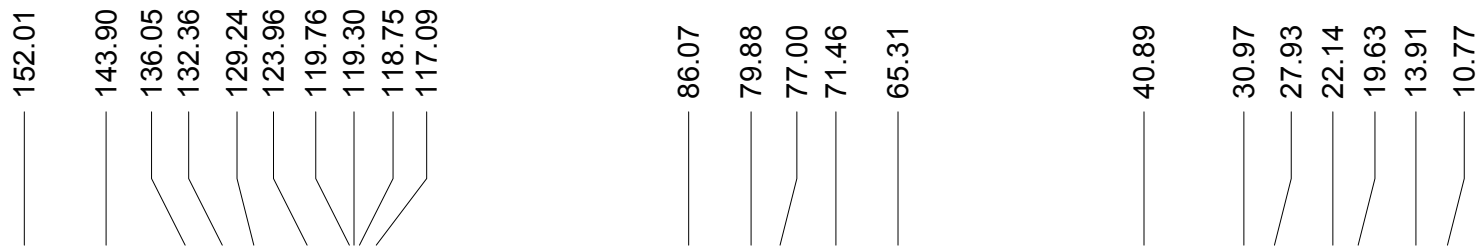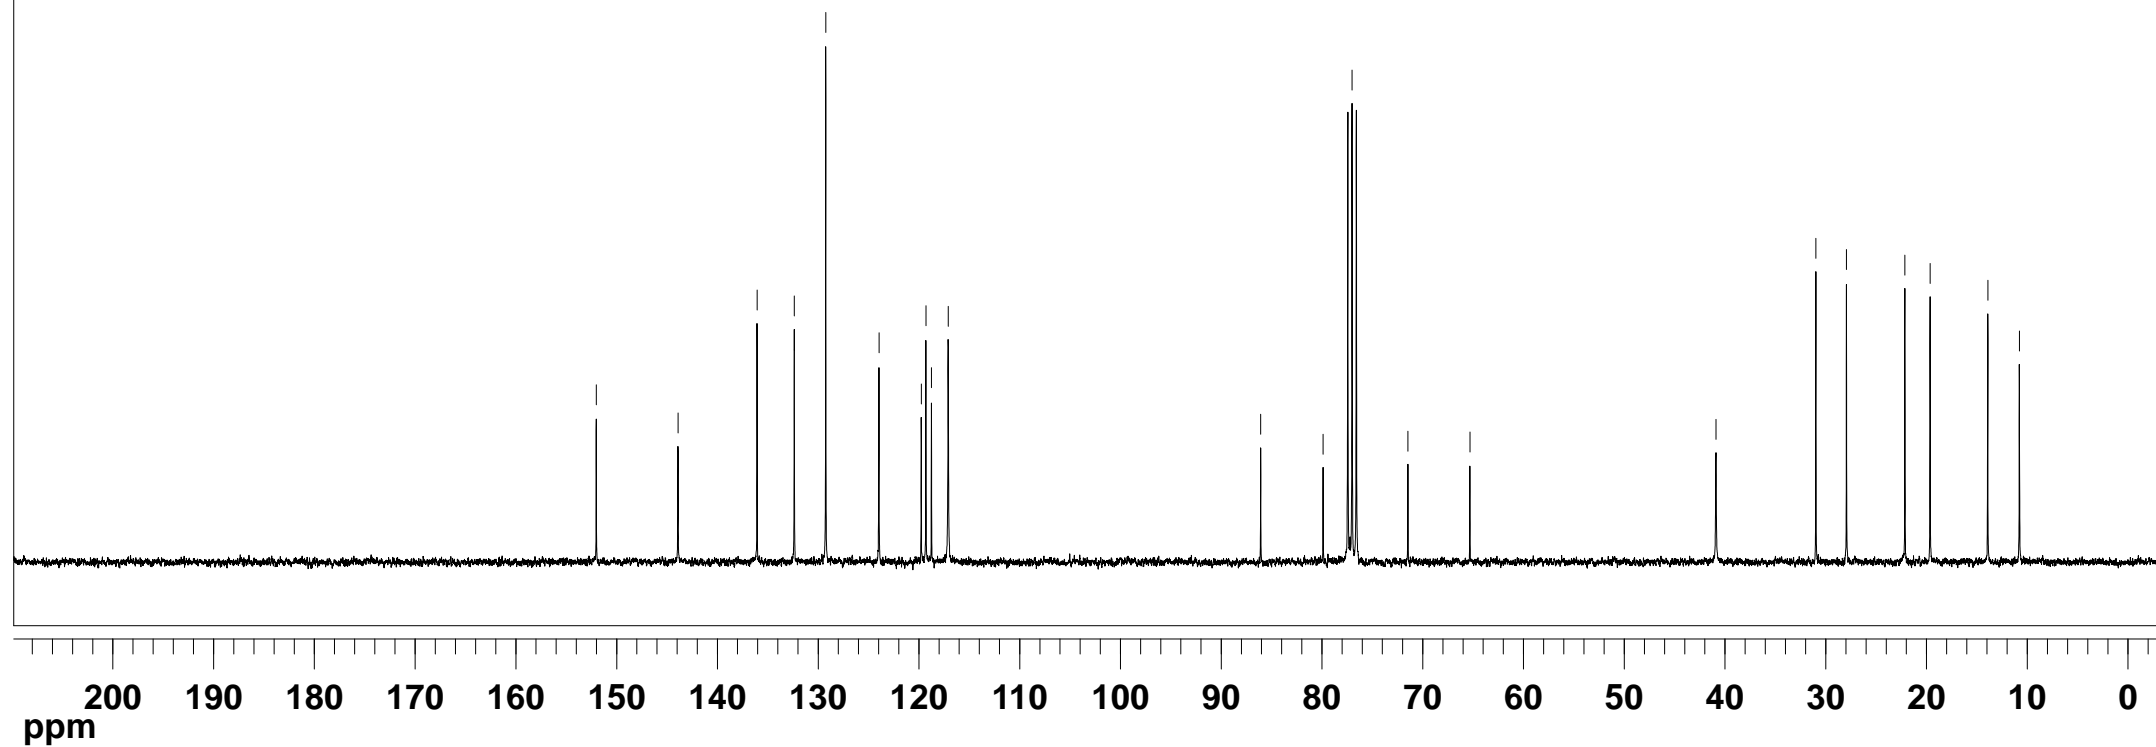

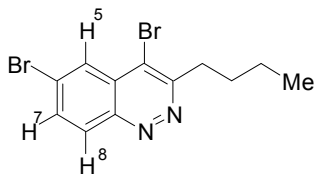

4a

<sup>1</sup>H NMR, 300 MHz

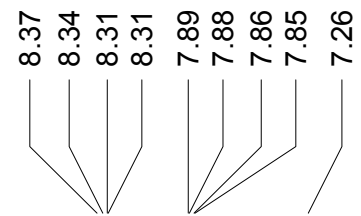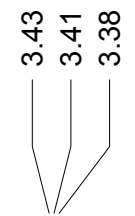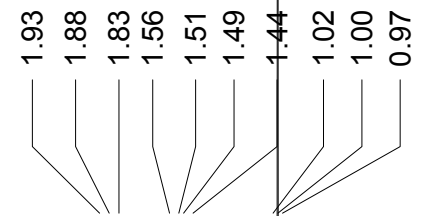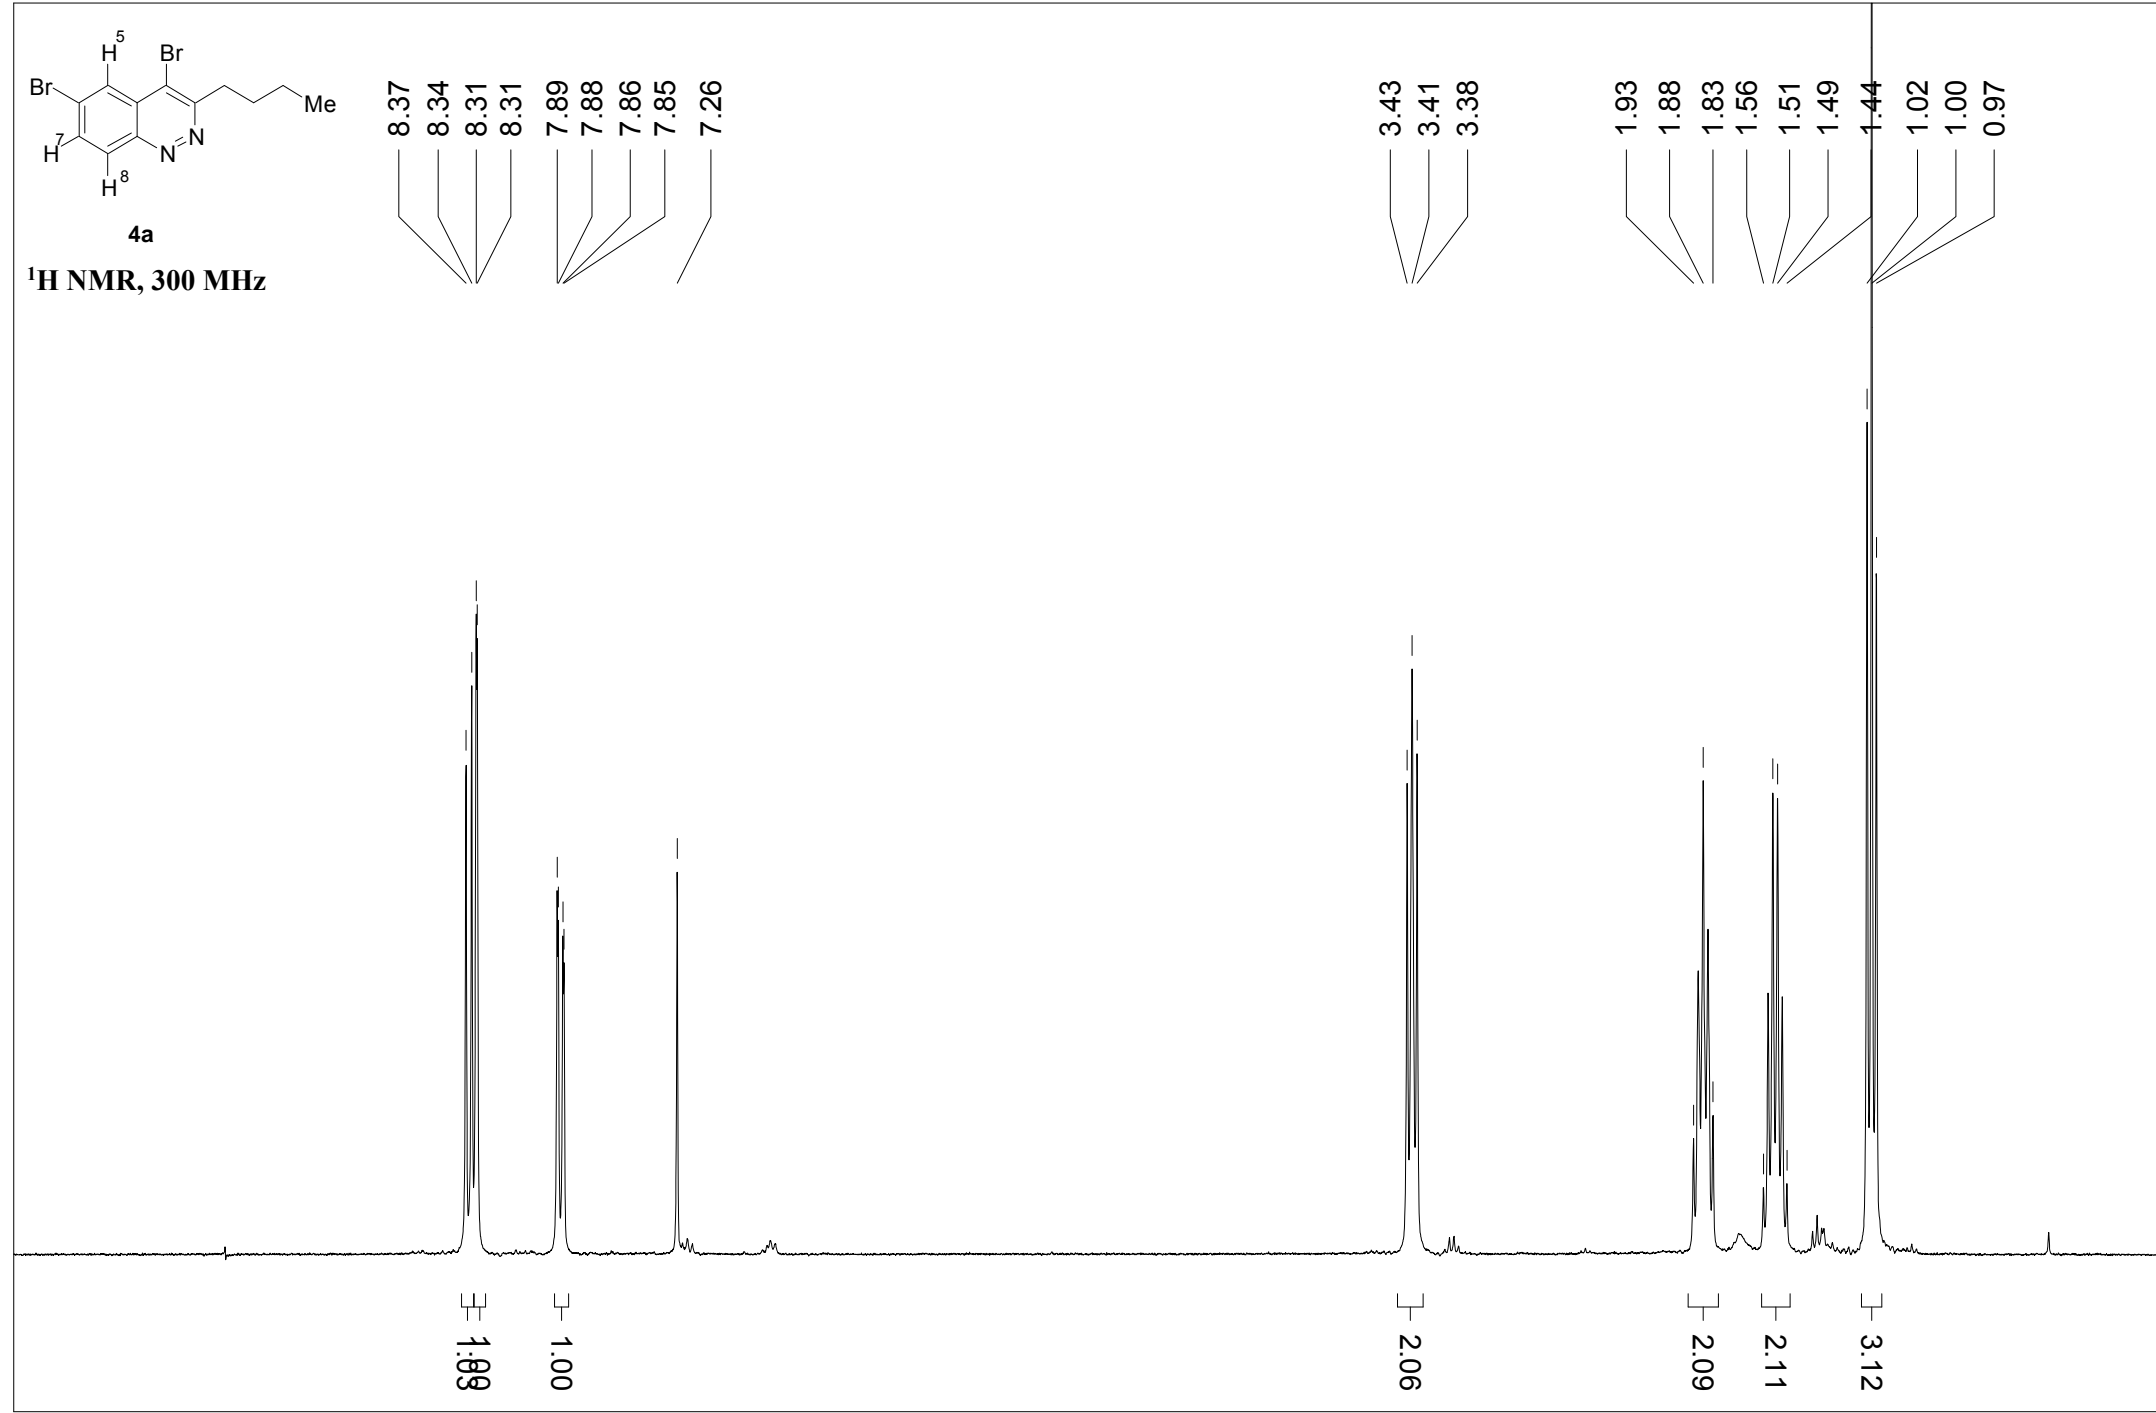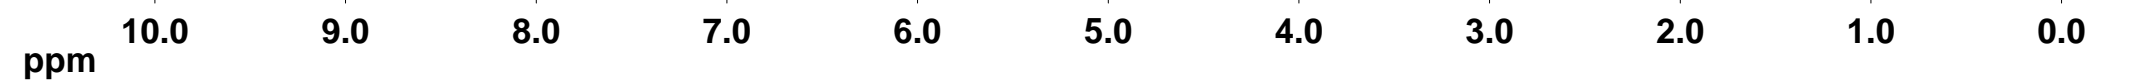

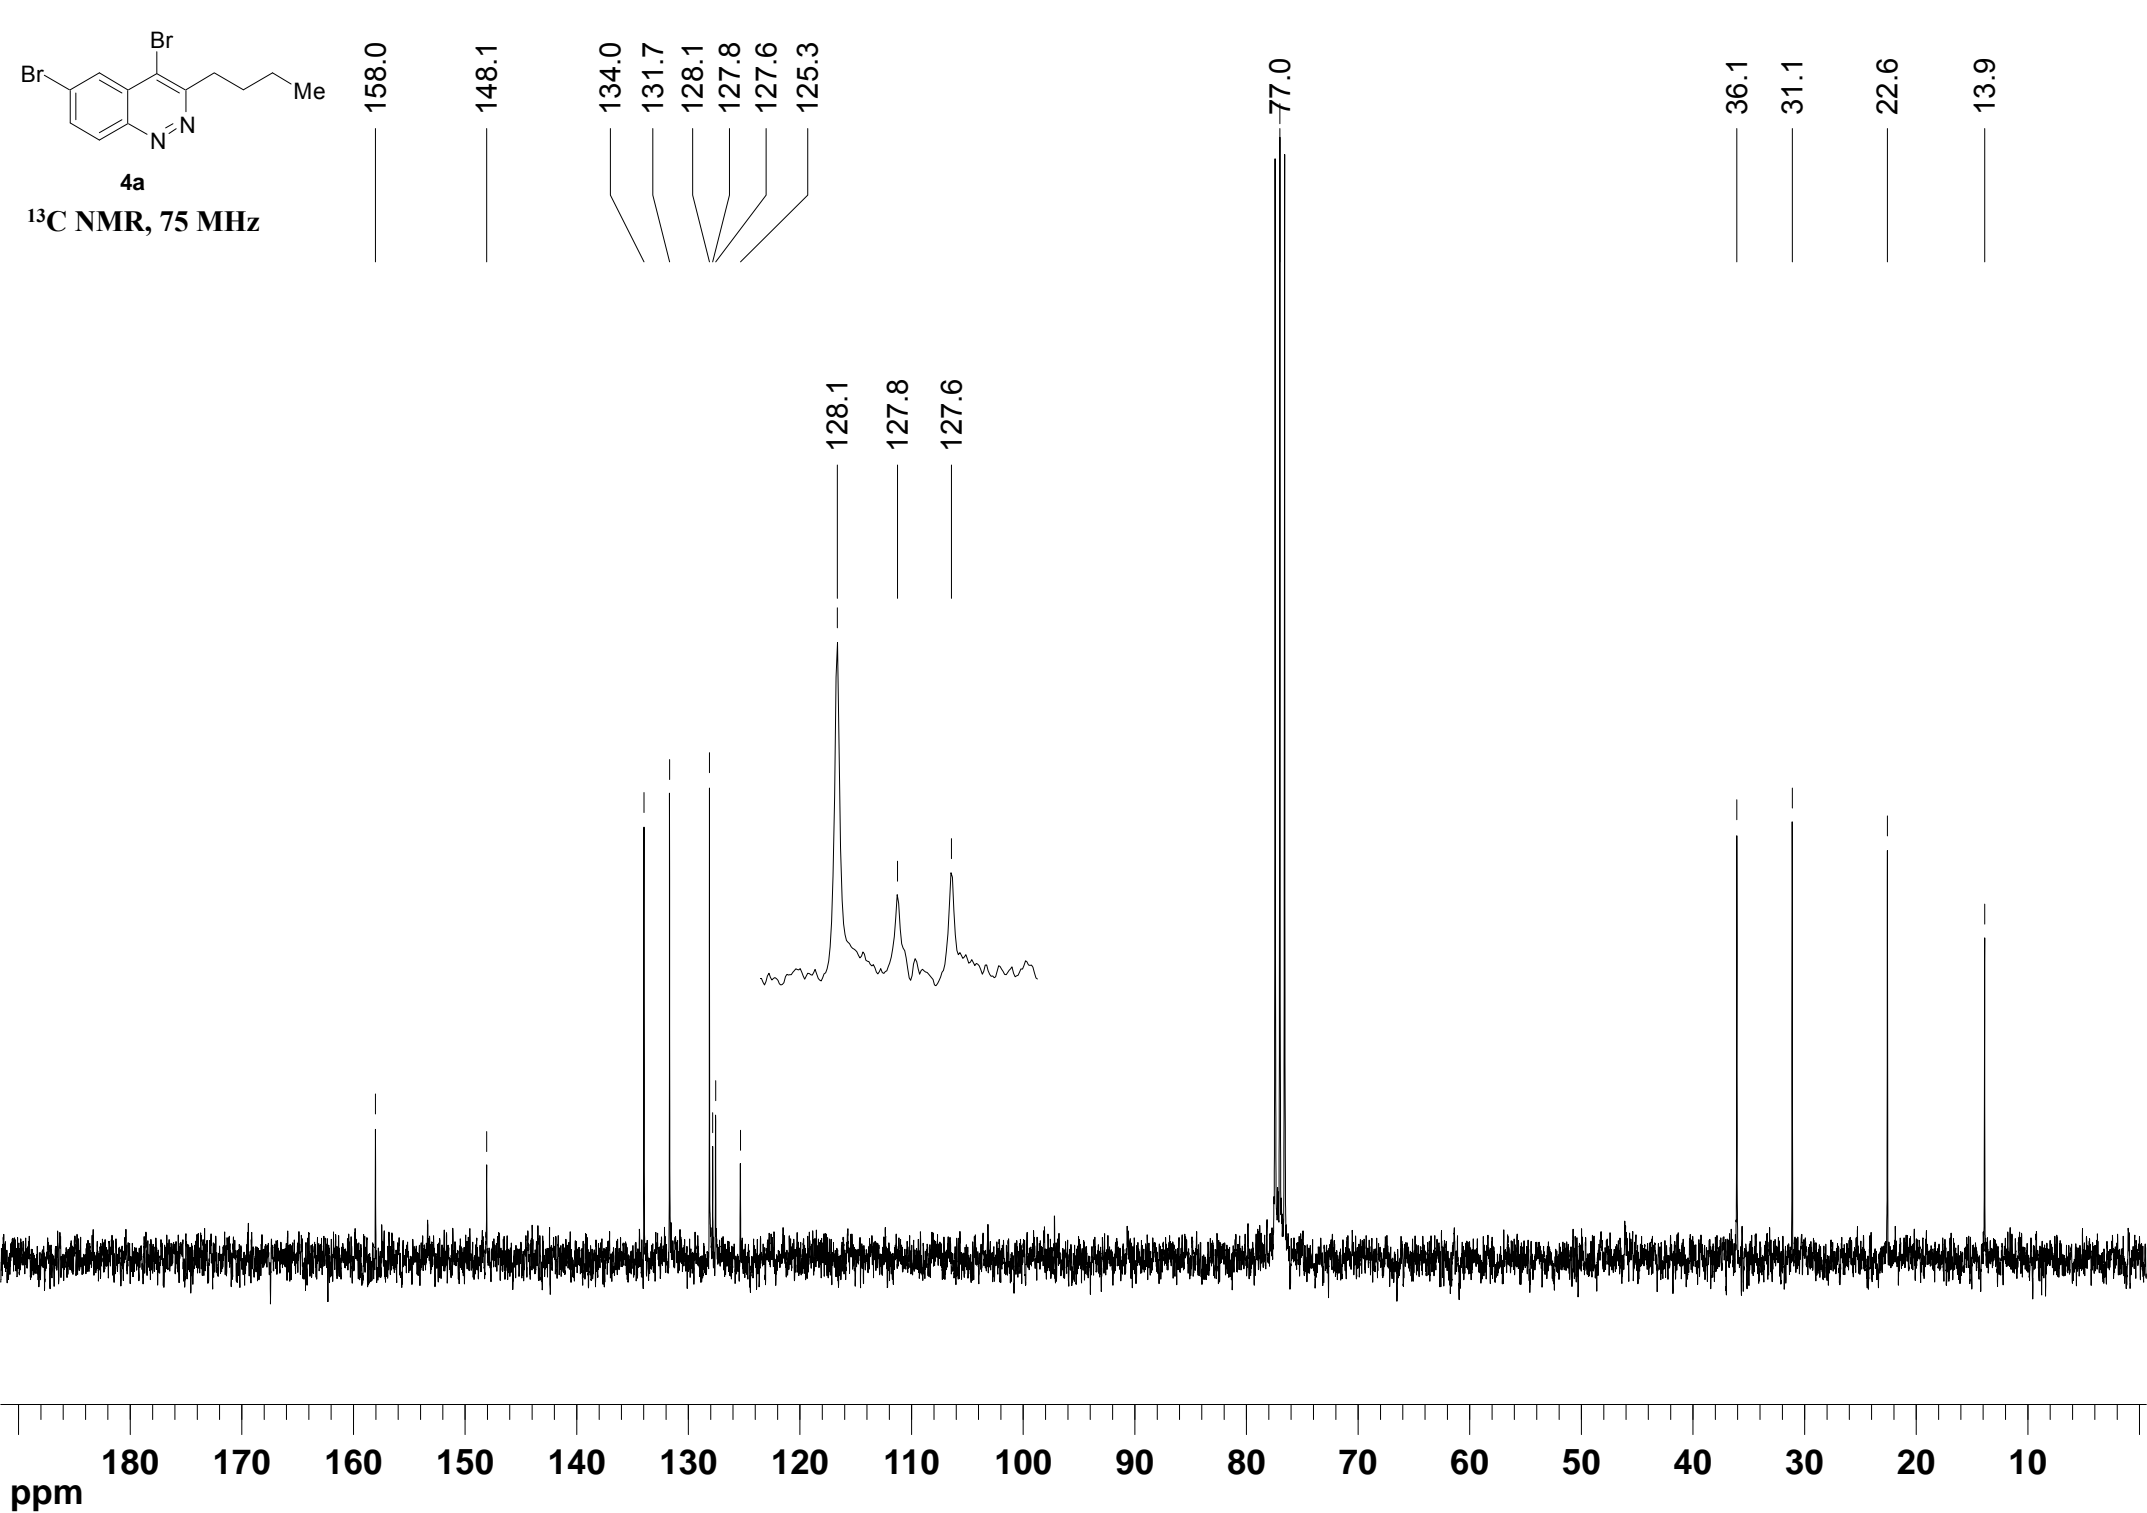



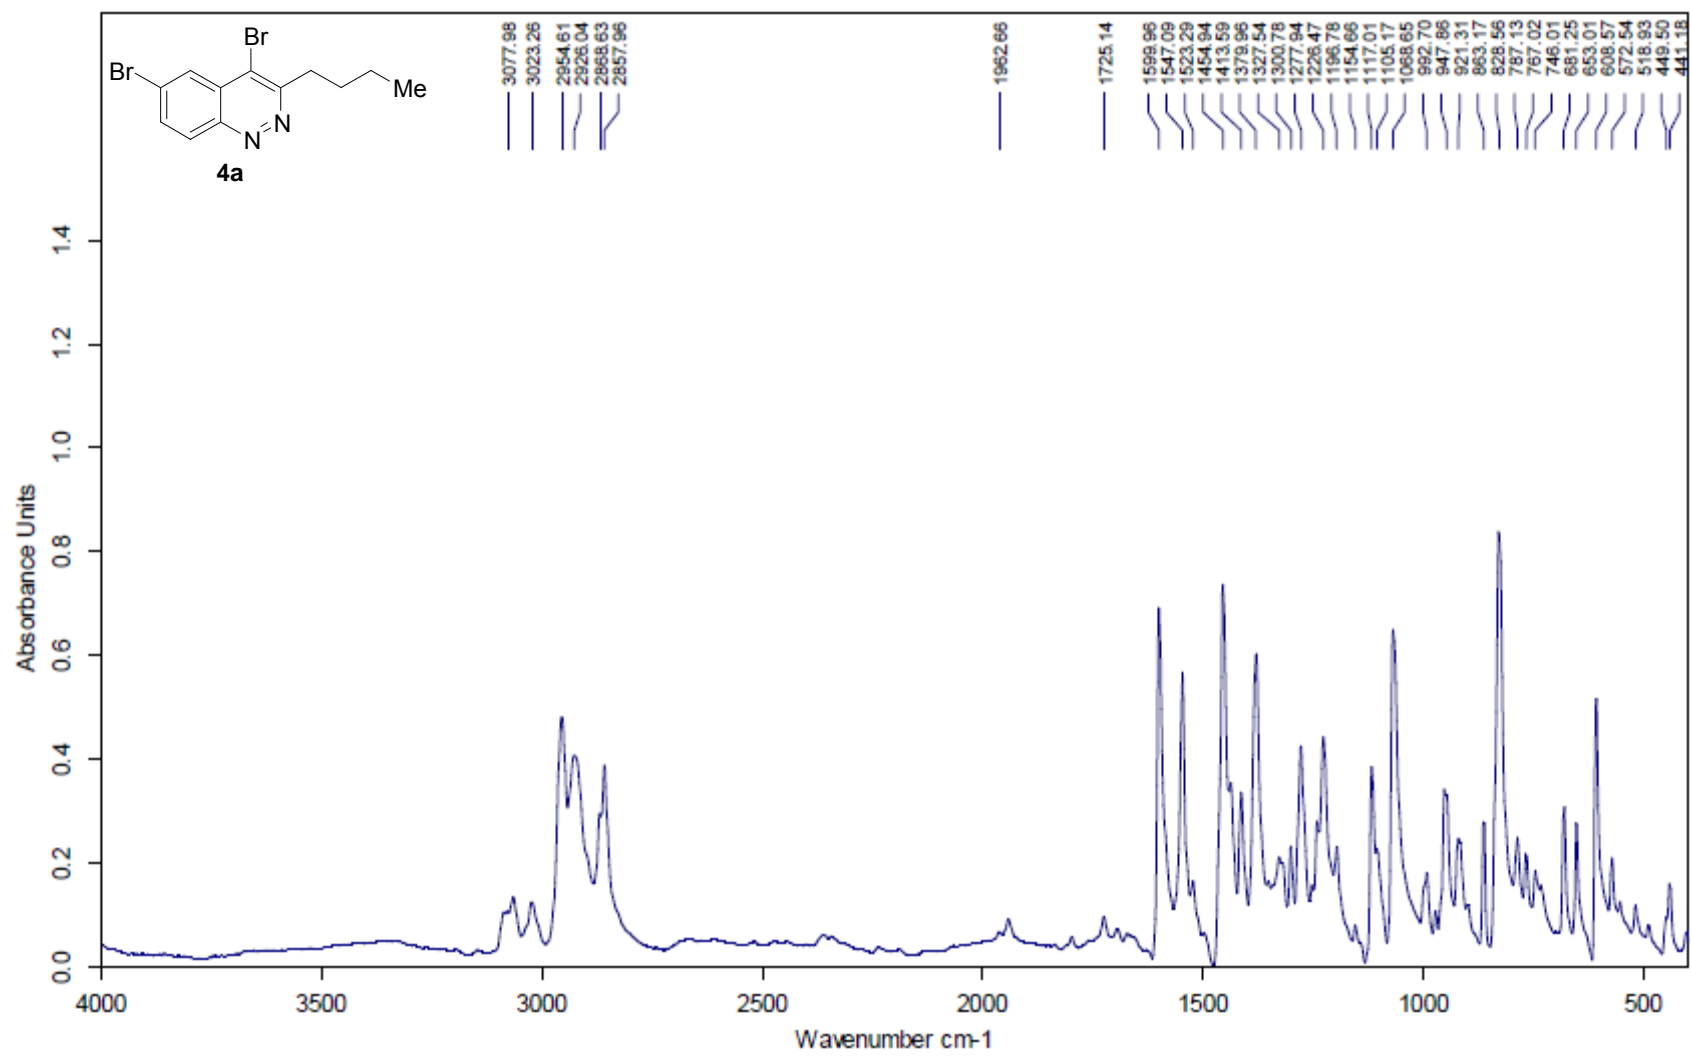

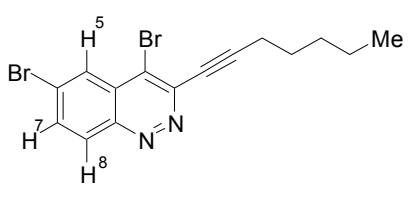

4b

<sup>1</sup>H NMR, 300 MHz

8.41  
8.38  
8.31  
8.30  
7.93  
7.92  
7.90  
7.89  
7.26

1.80  
1.75  
1.70  
1.59  
1.54  
1.49  
1.46  
1.41  
1.39  
1.34  
0.97  
0.94  
0.92

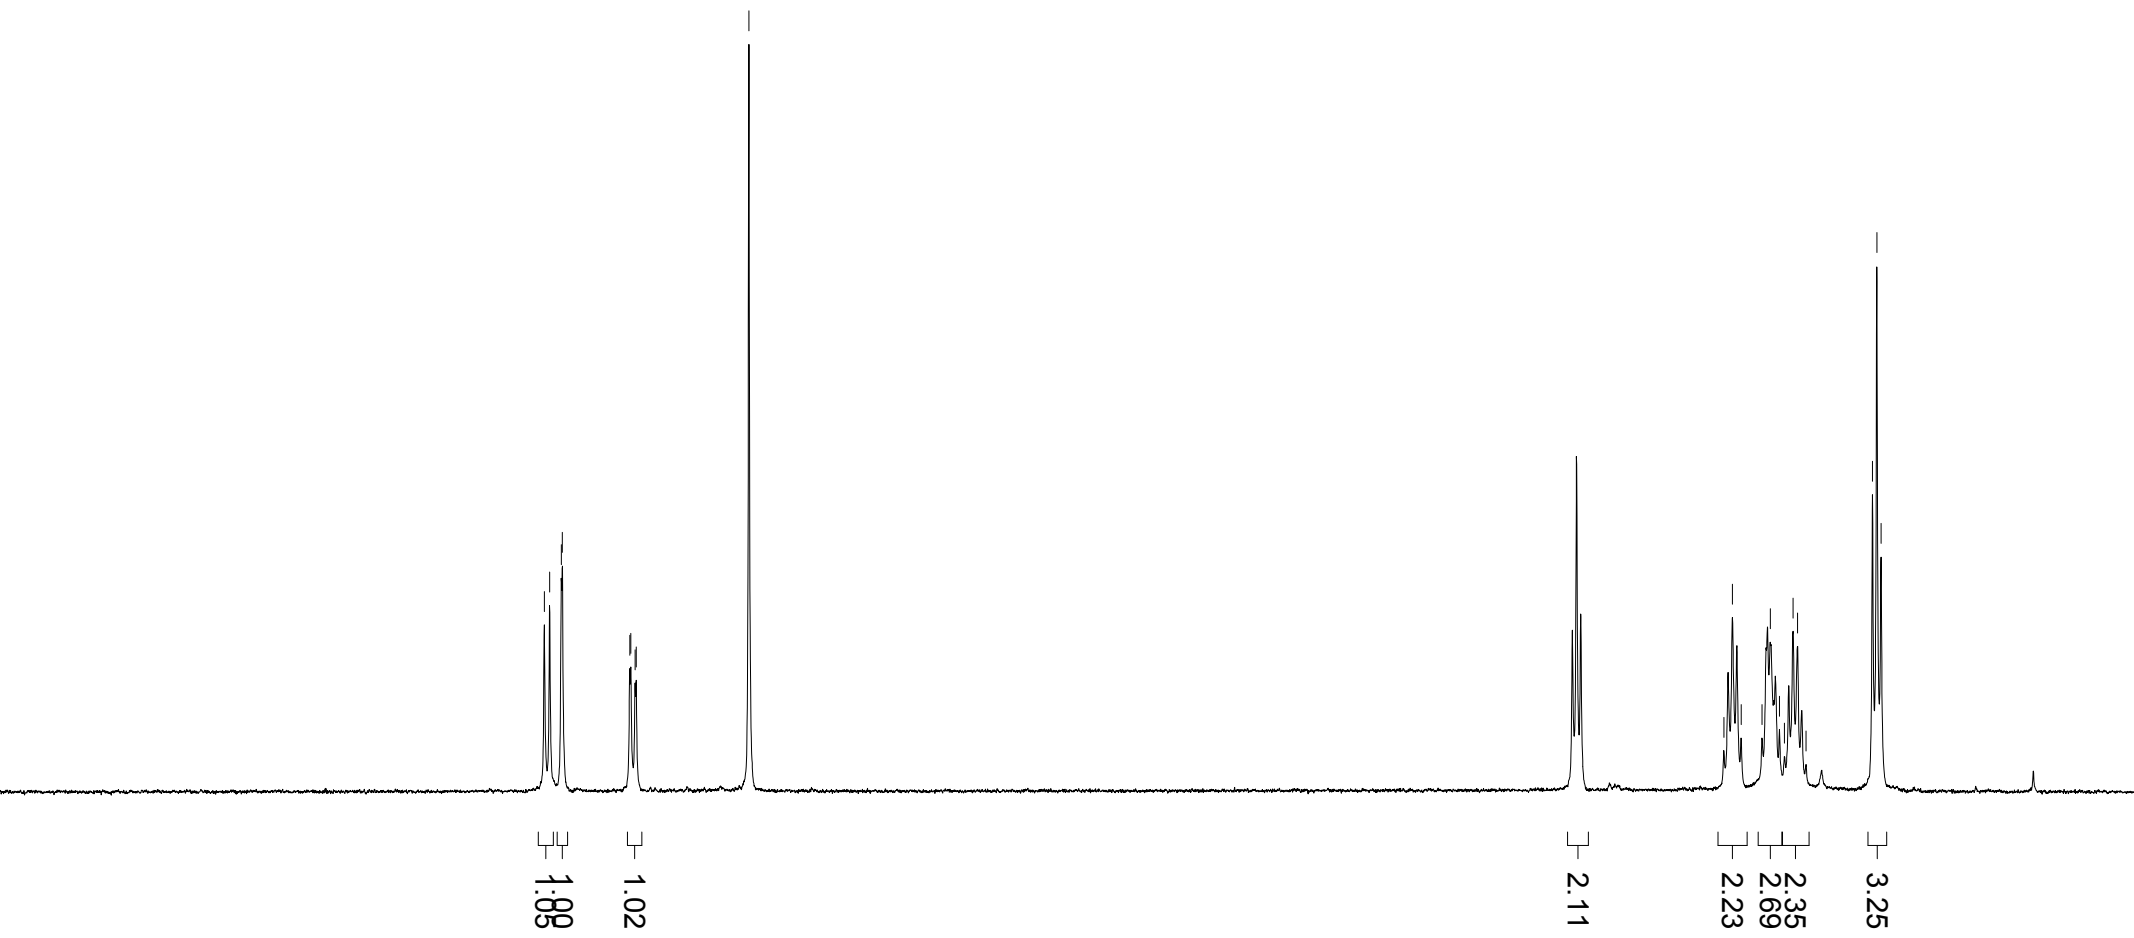

11.0 10.0 9.0 8.0 7.0 6.0 5.0 4.0 3.0 2.0 1.0 0.0  
ppm

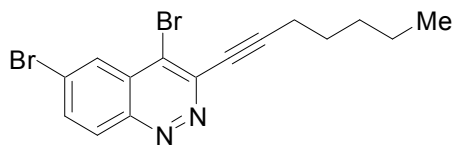

4b

<sup>13</sup>C NMR, 75 MHz

146.9  
143.6  
134.8  
131.9  
128.3  
128.2  
127.4  
127.1

101.0

77.8  
77.0

31.1  
27.8  
22.2  
19.8  
14.0

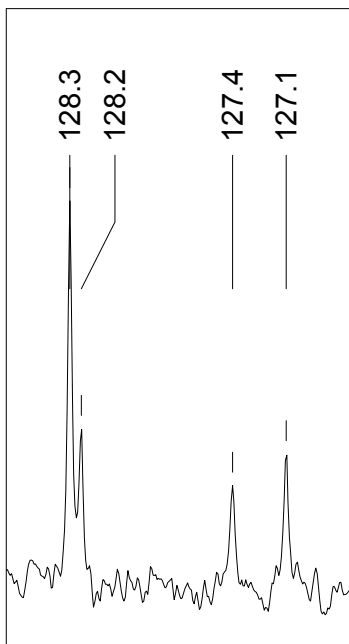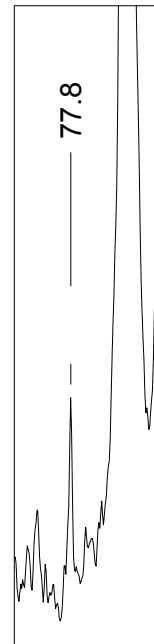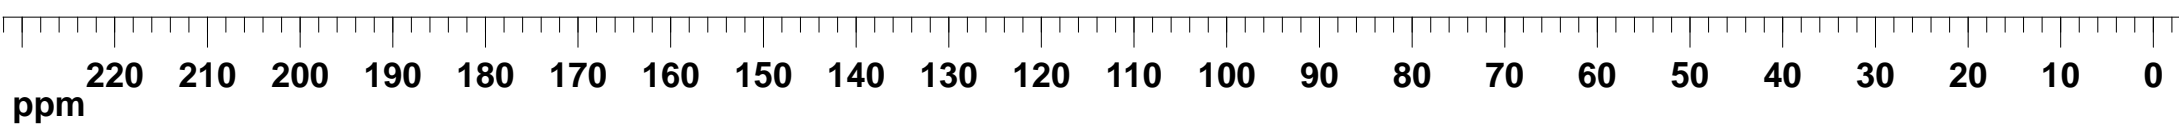

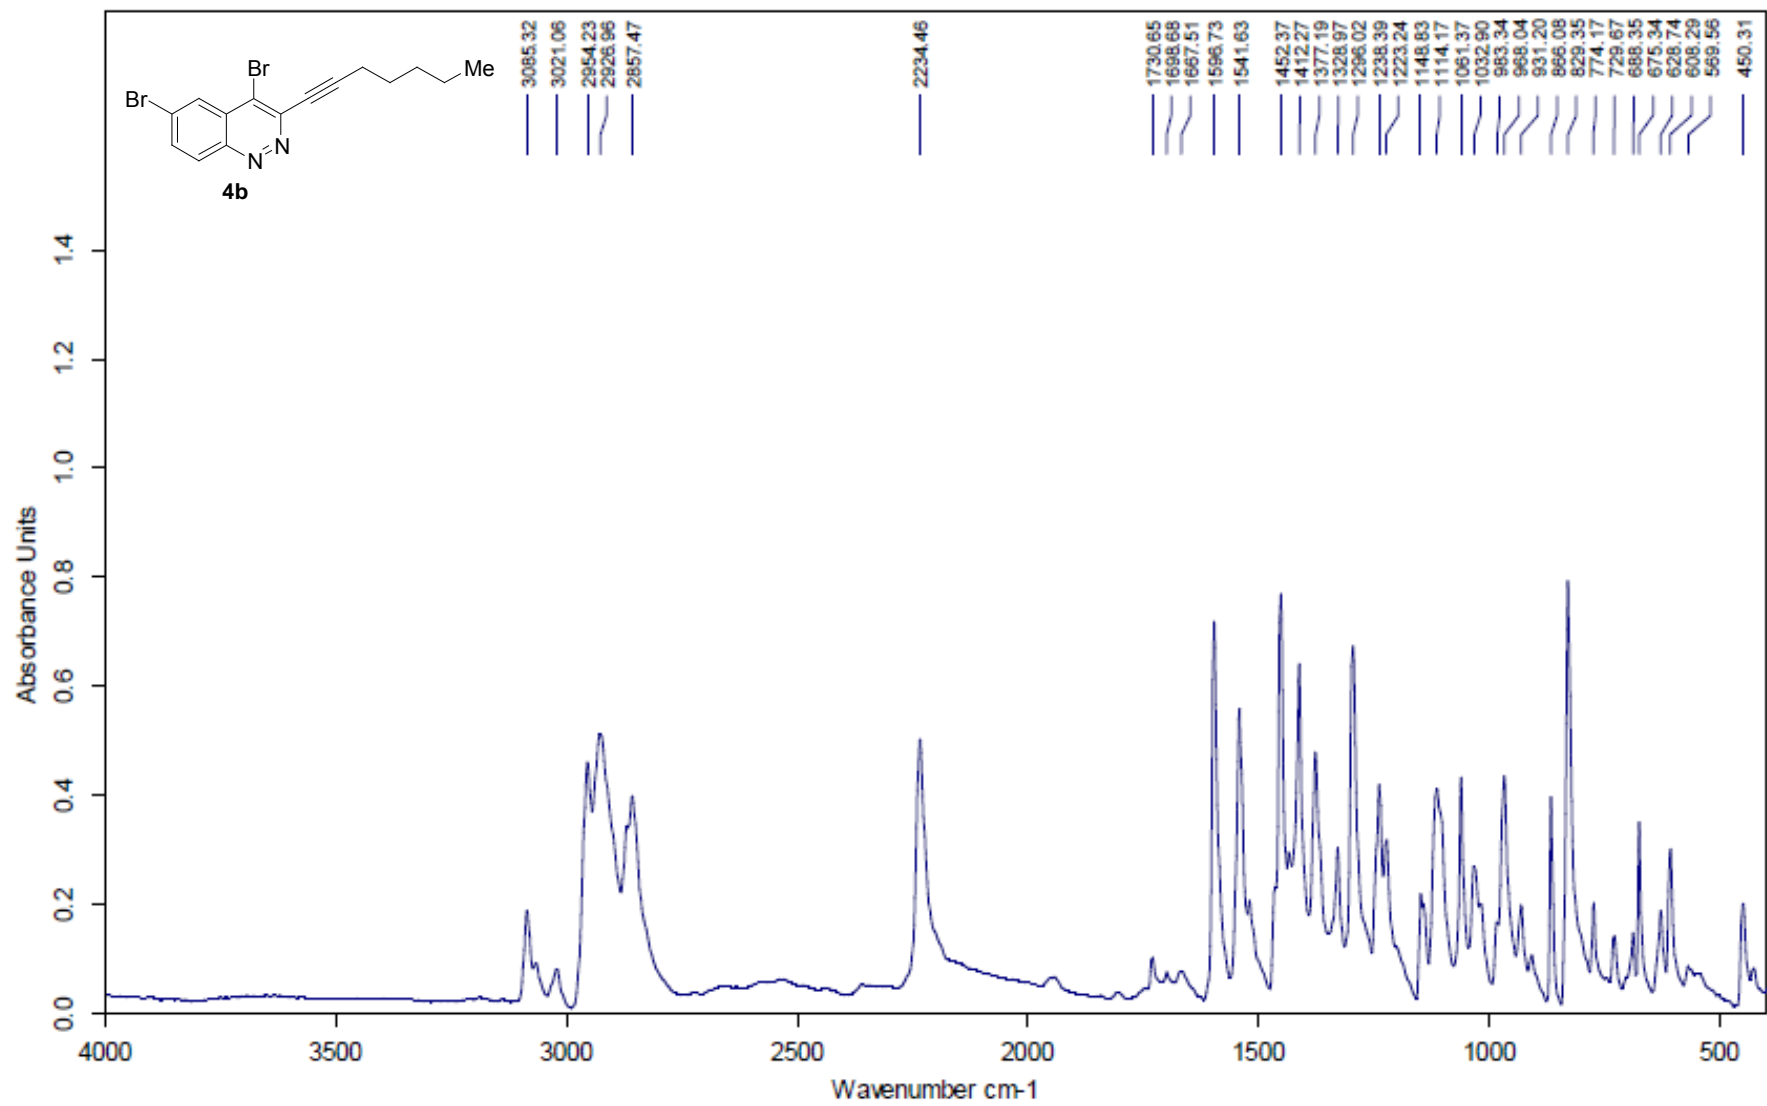

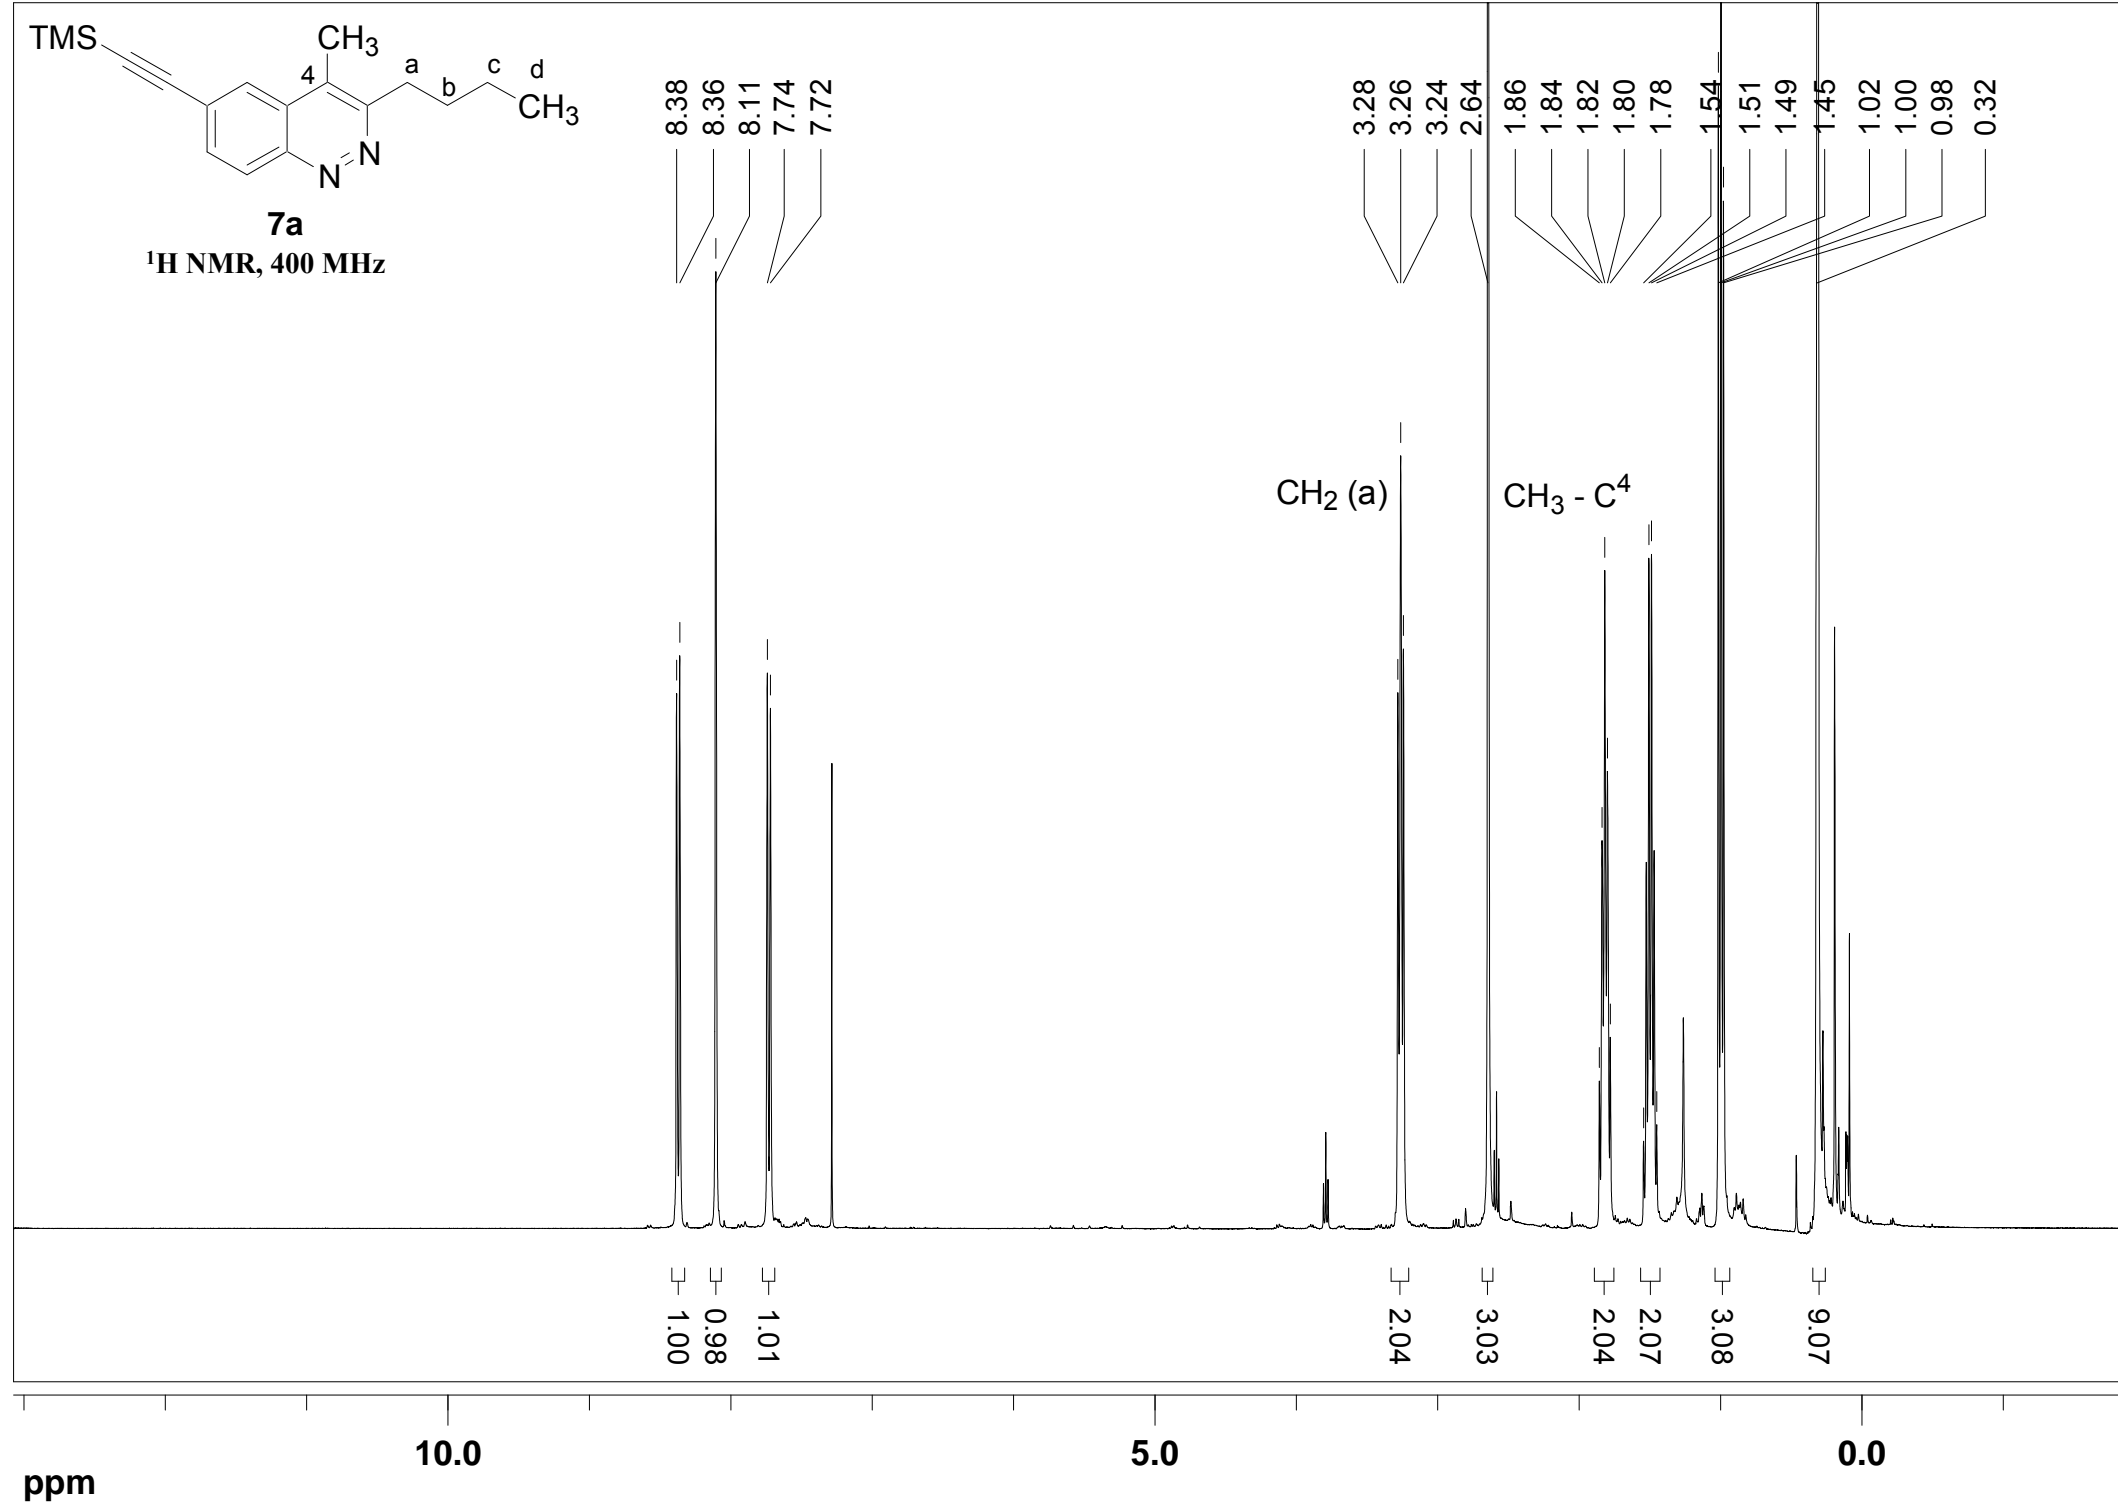

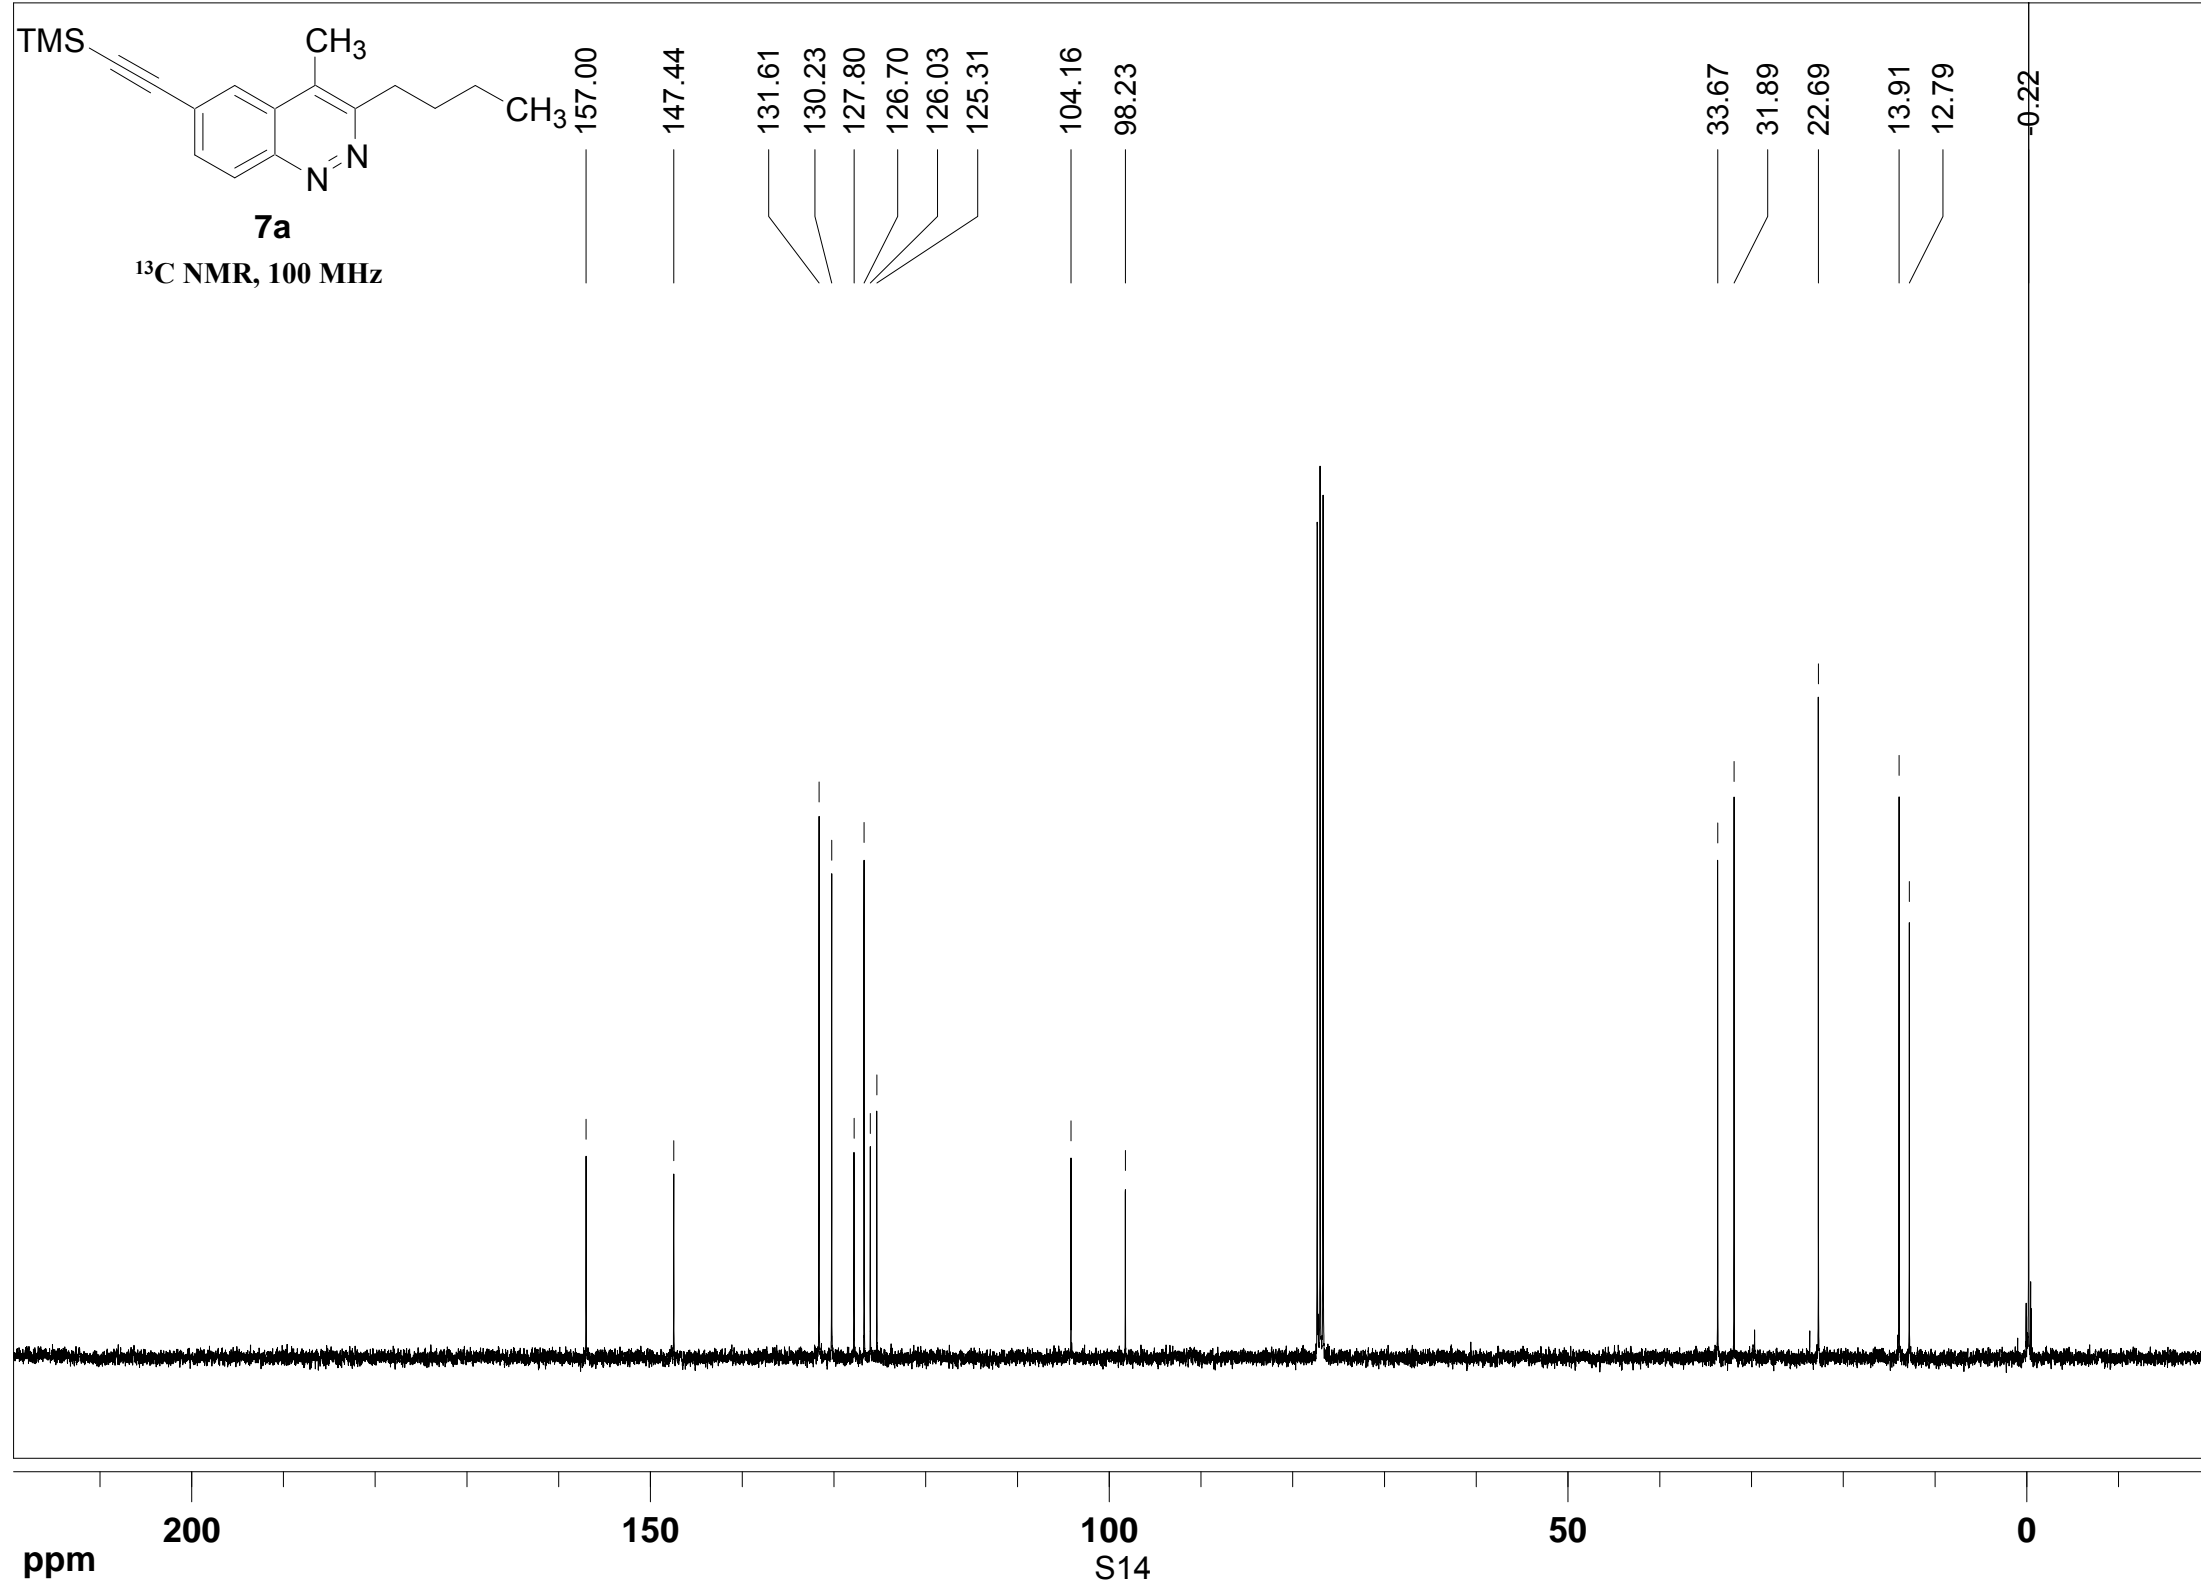

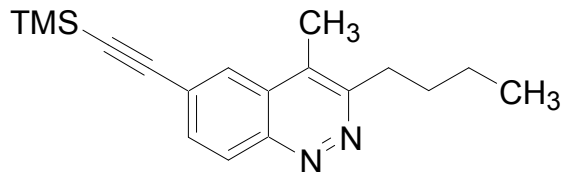

7a

DEPT 135 NMR

131.66  
130.28  
126.75

33.72  
31.94

22.74

13.95  
12.84

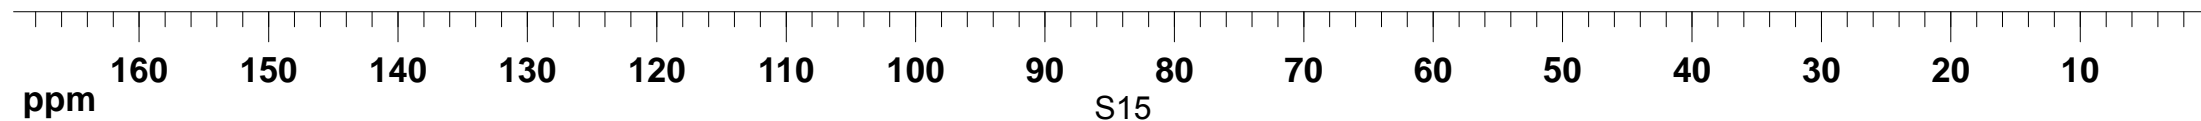

NOESY NMR

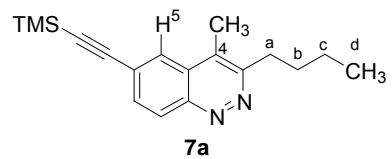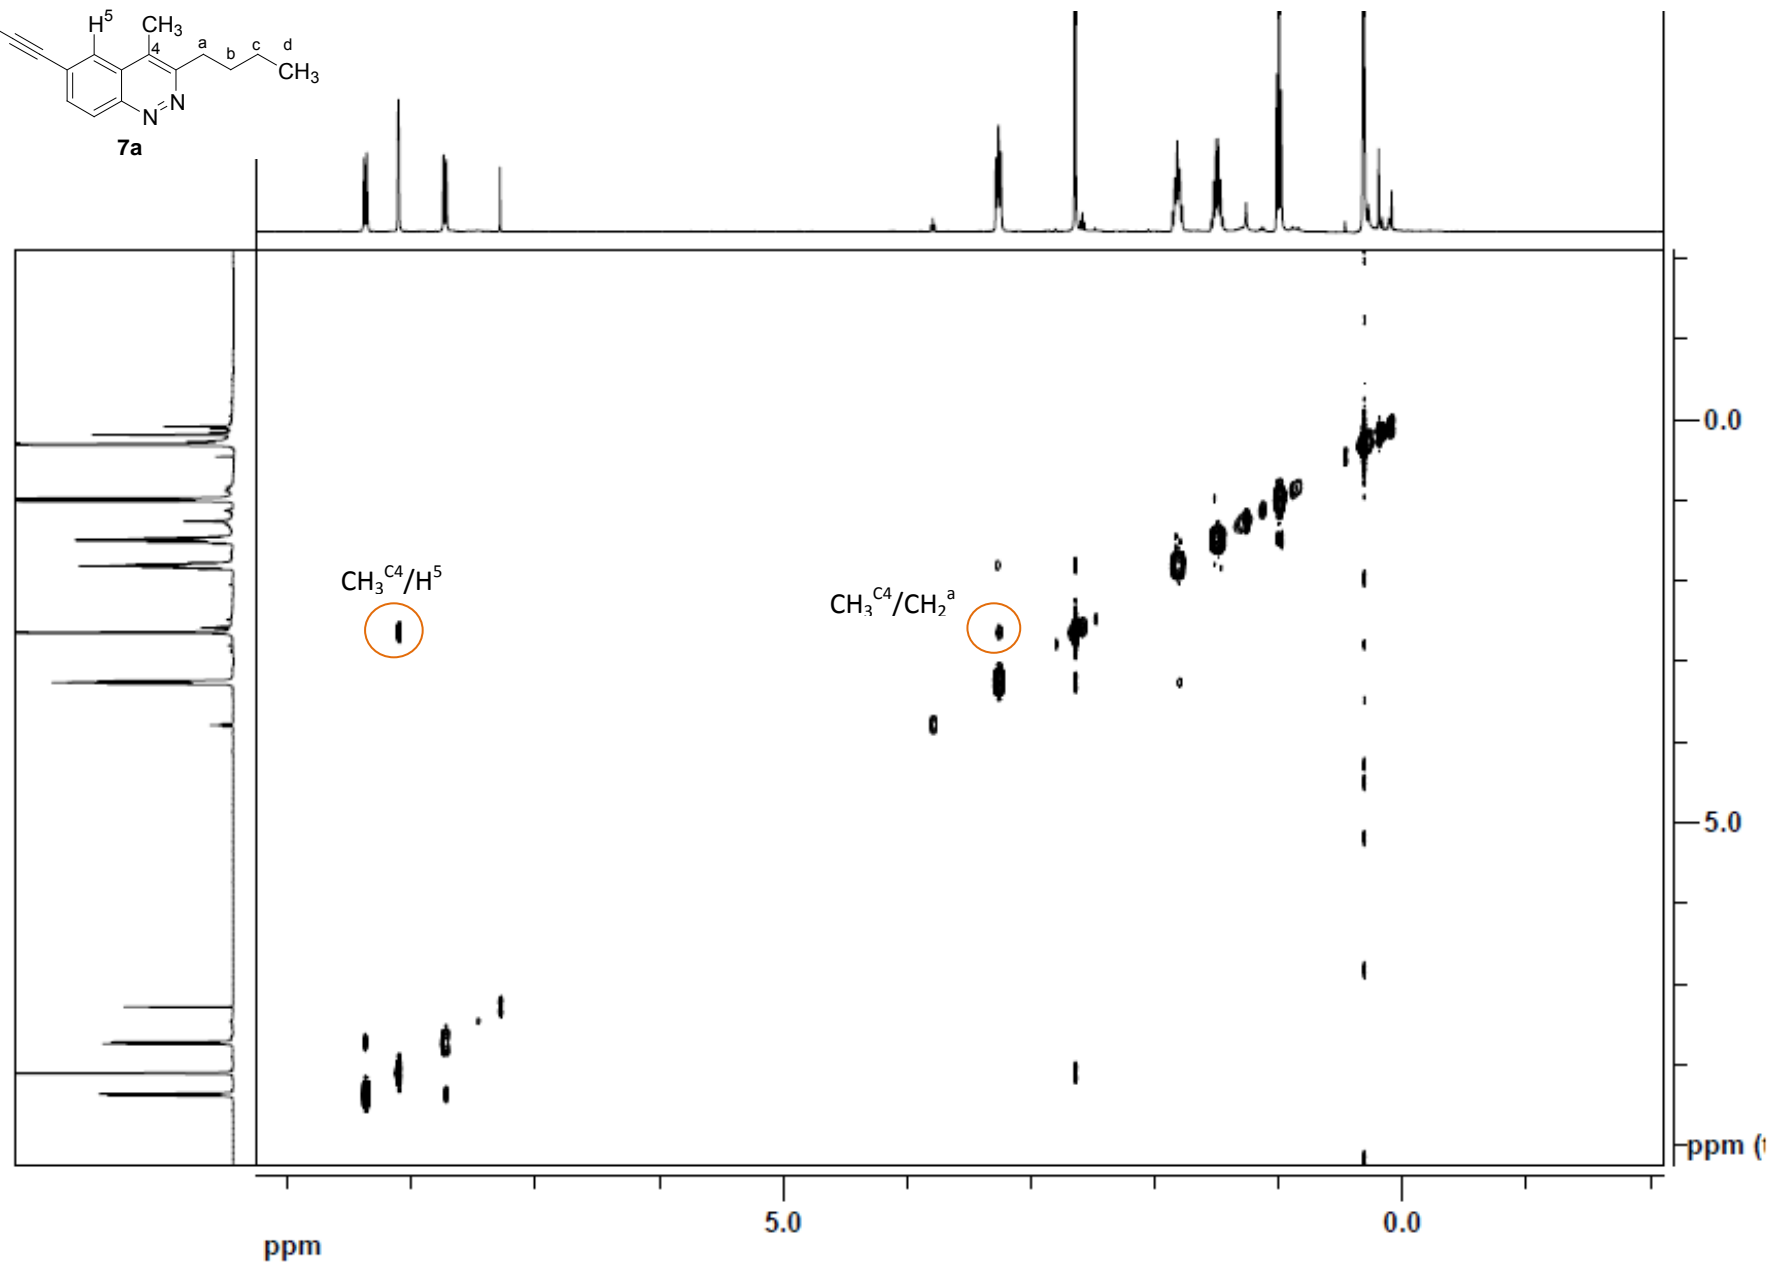



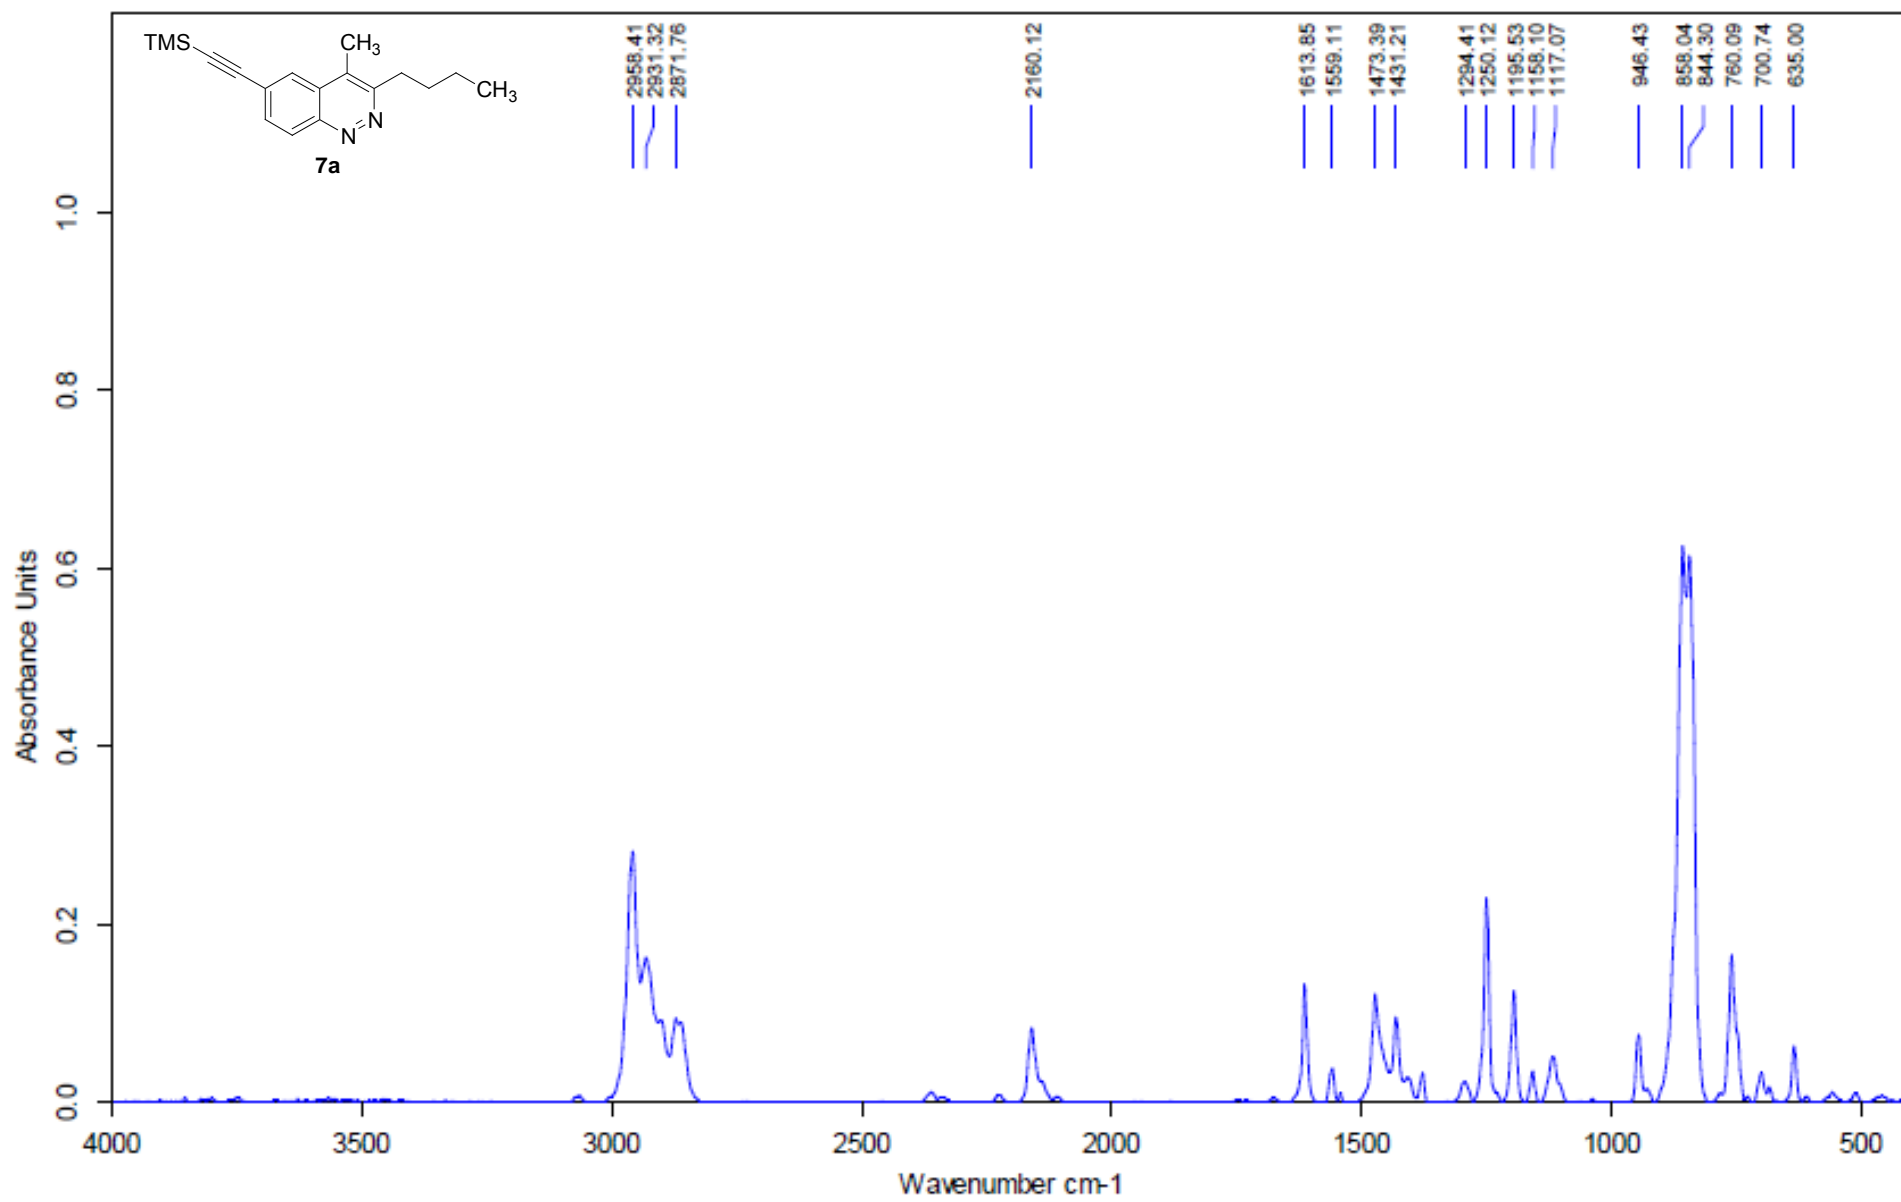

<sup>1</sup>H NMR, 400 MHz

8.41  
8.39  
8.39  
8.36  
8.26  
8.25  
8.21  
8.20  
7.78  
7.77  
7.76  
7.75  
7.75  
7.74  
7.73

3.96  
3.38  
3.36

1.93  
1.85  
1.52  
1.43  
1.00  
0.99  
0.96  
0.37  
0.30  
0.30

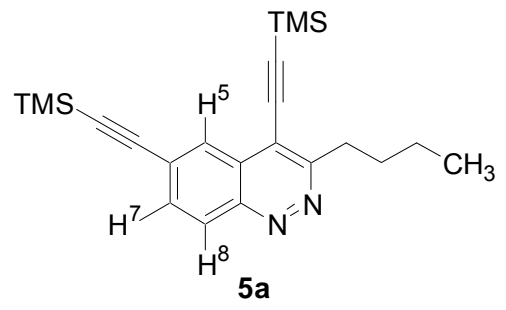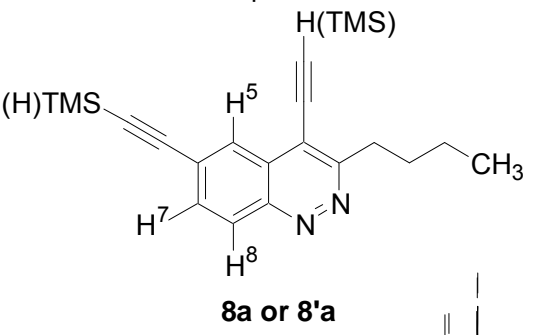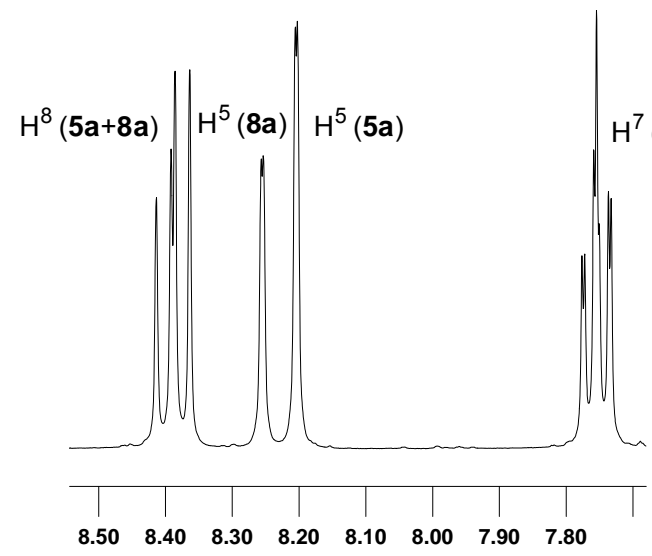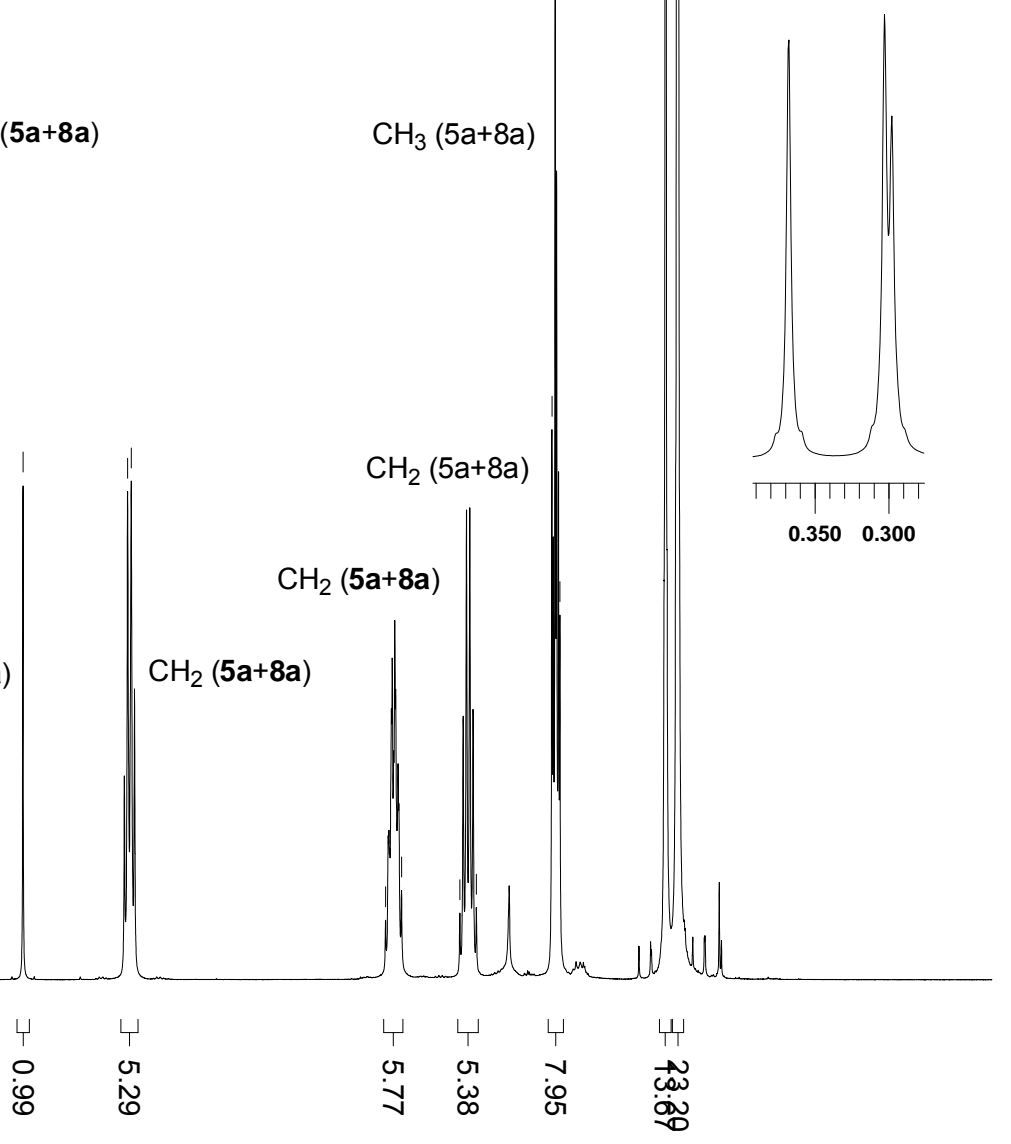

10.0  
ppm

5.0  
S18

0.0

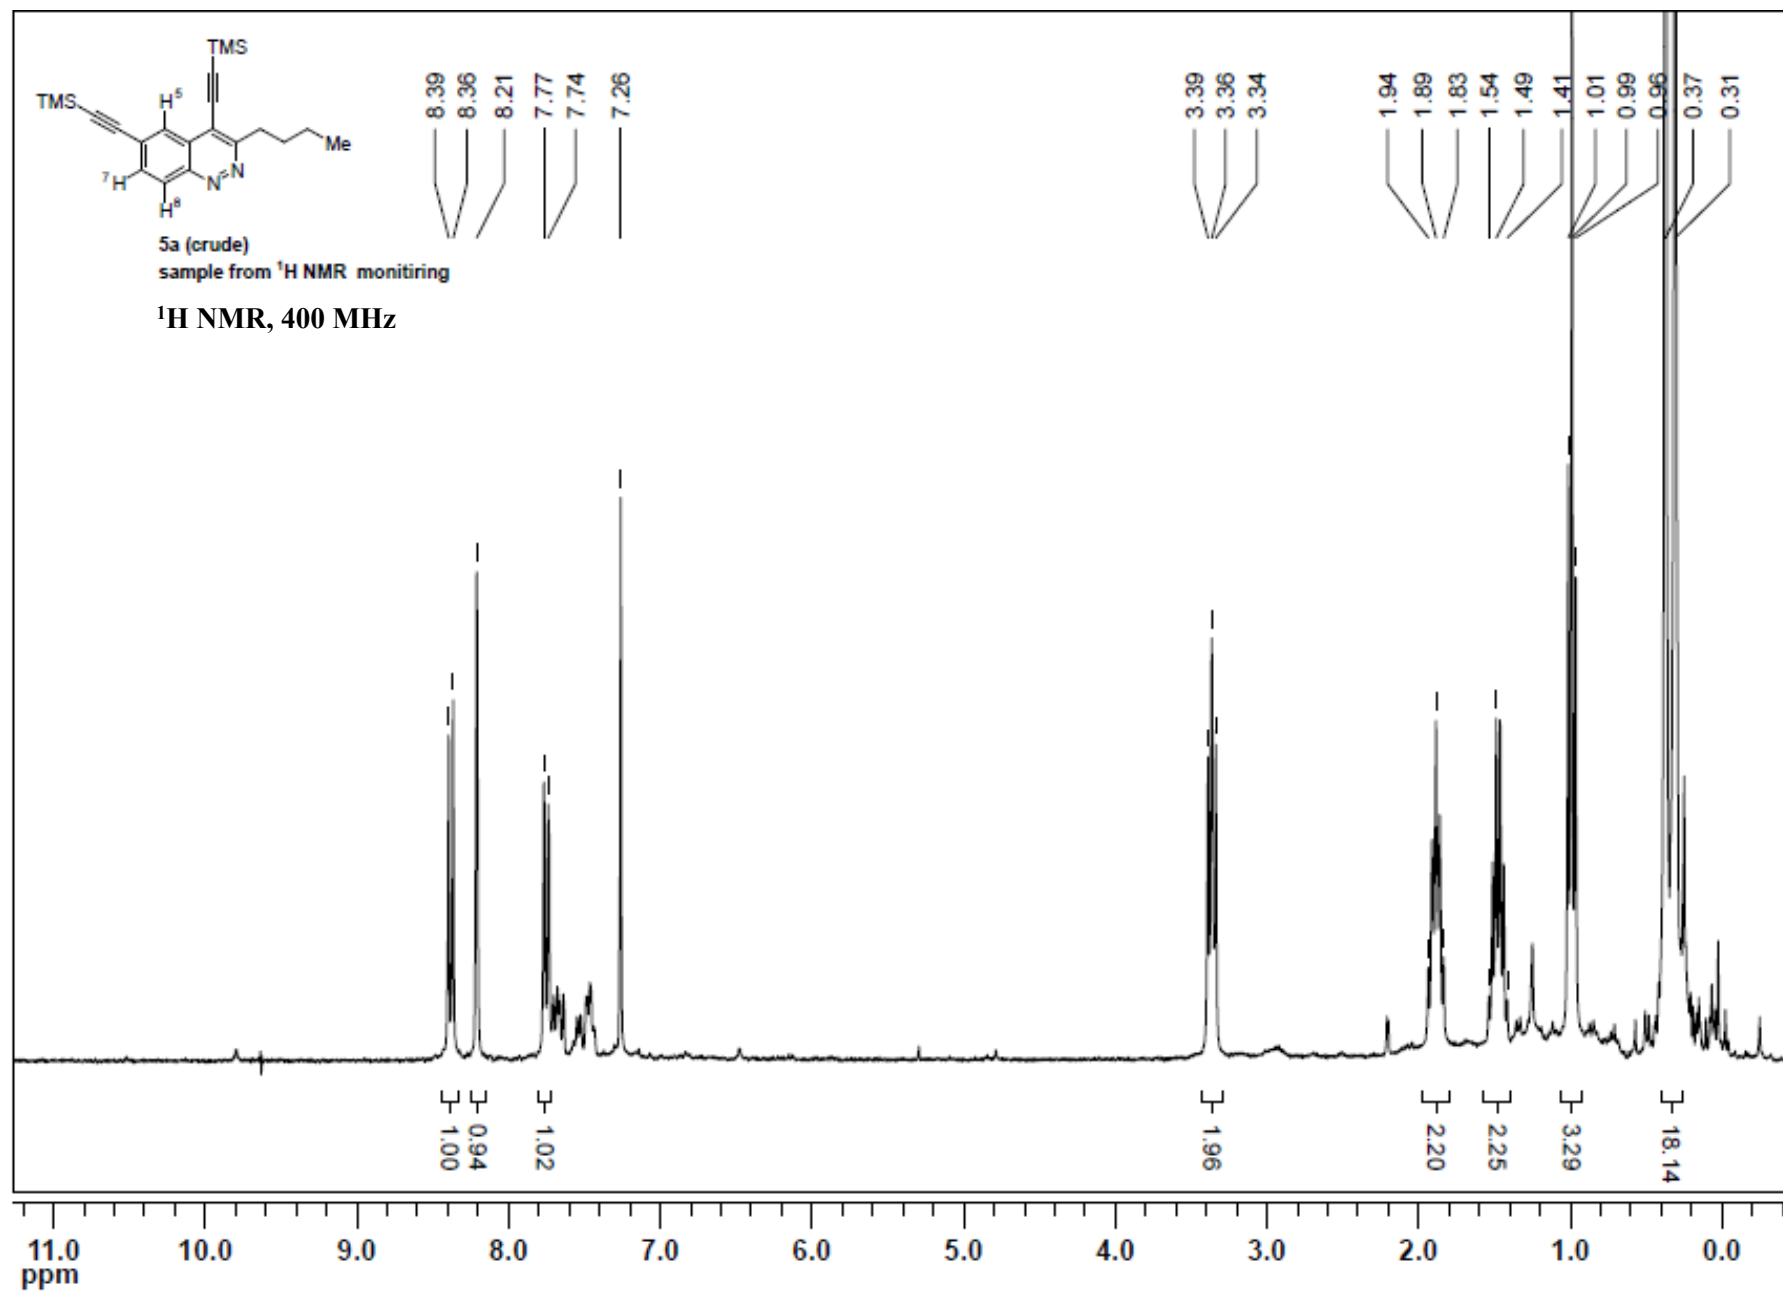

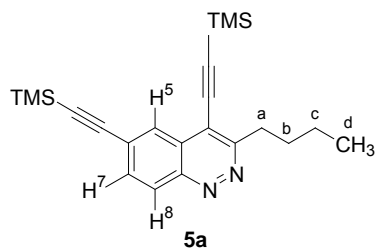

$^1\text{H NMR}$ , 400 MHz

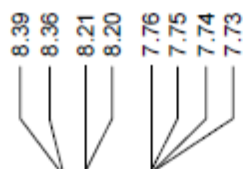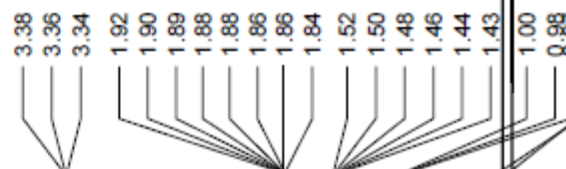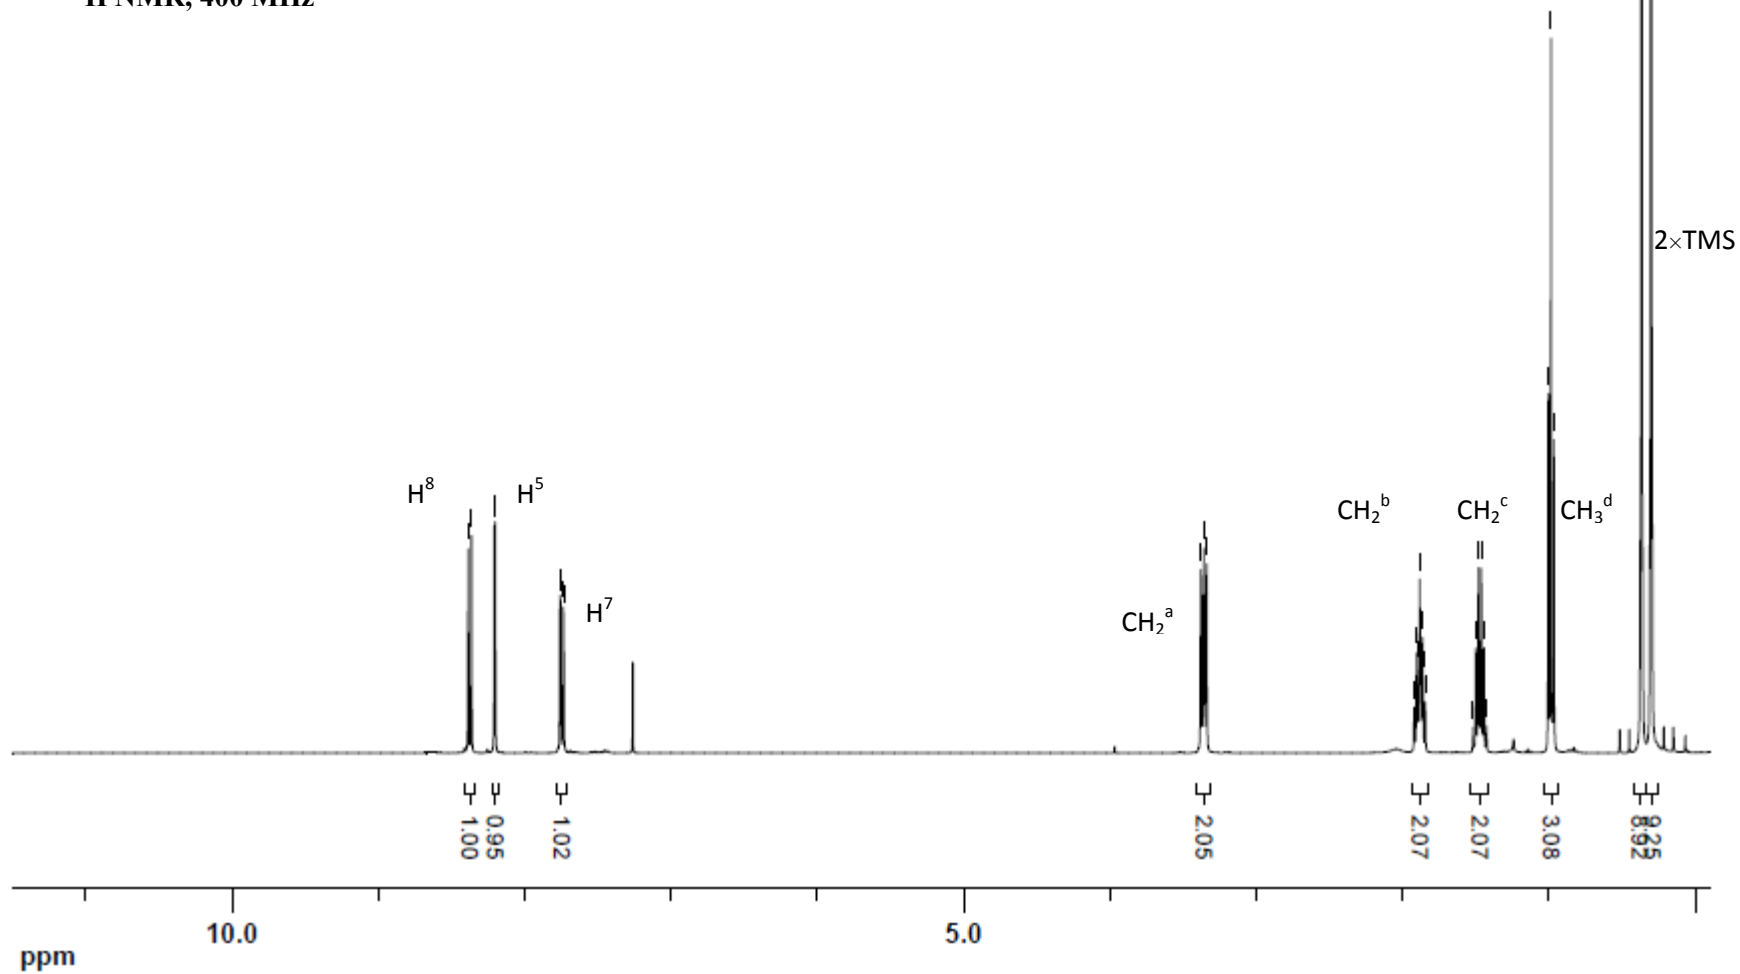

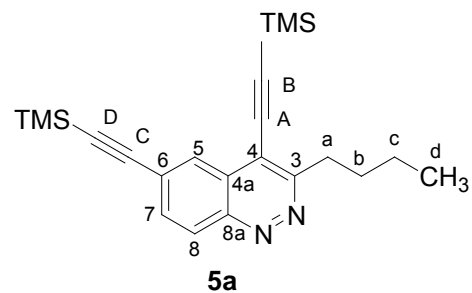

$^{13}\text{C}$  NMR, 100 MHz

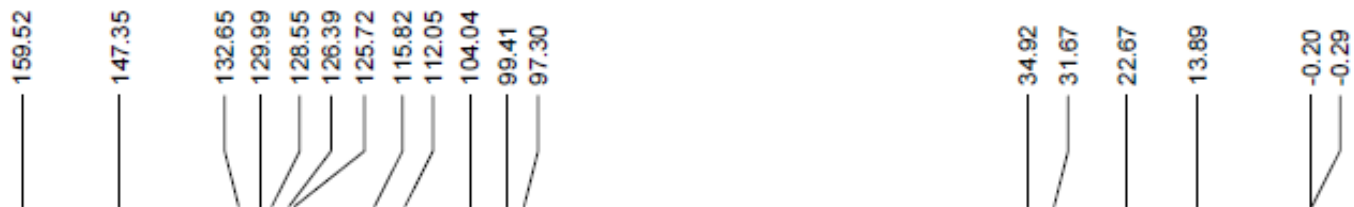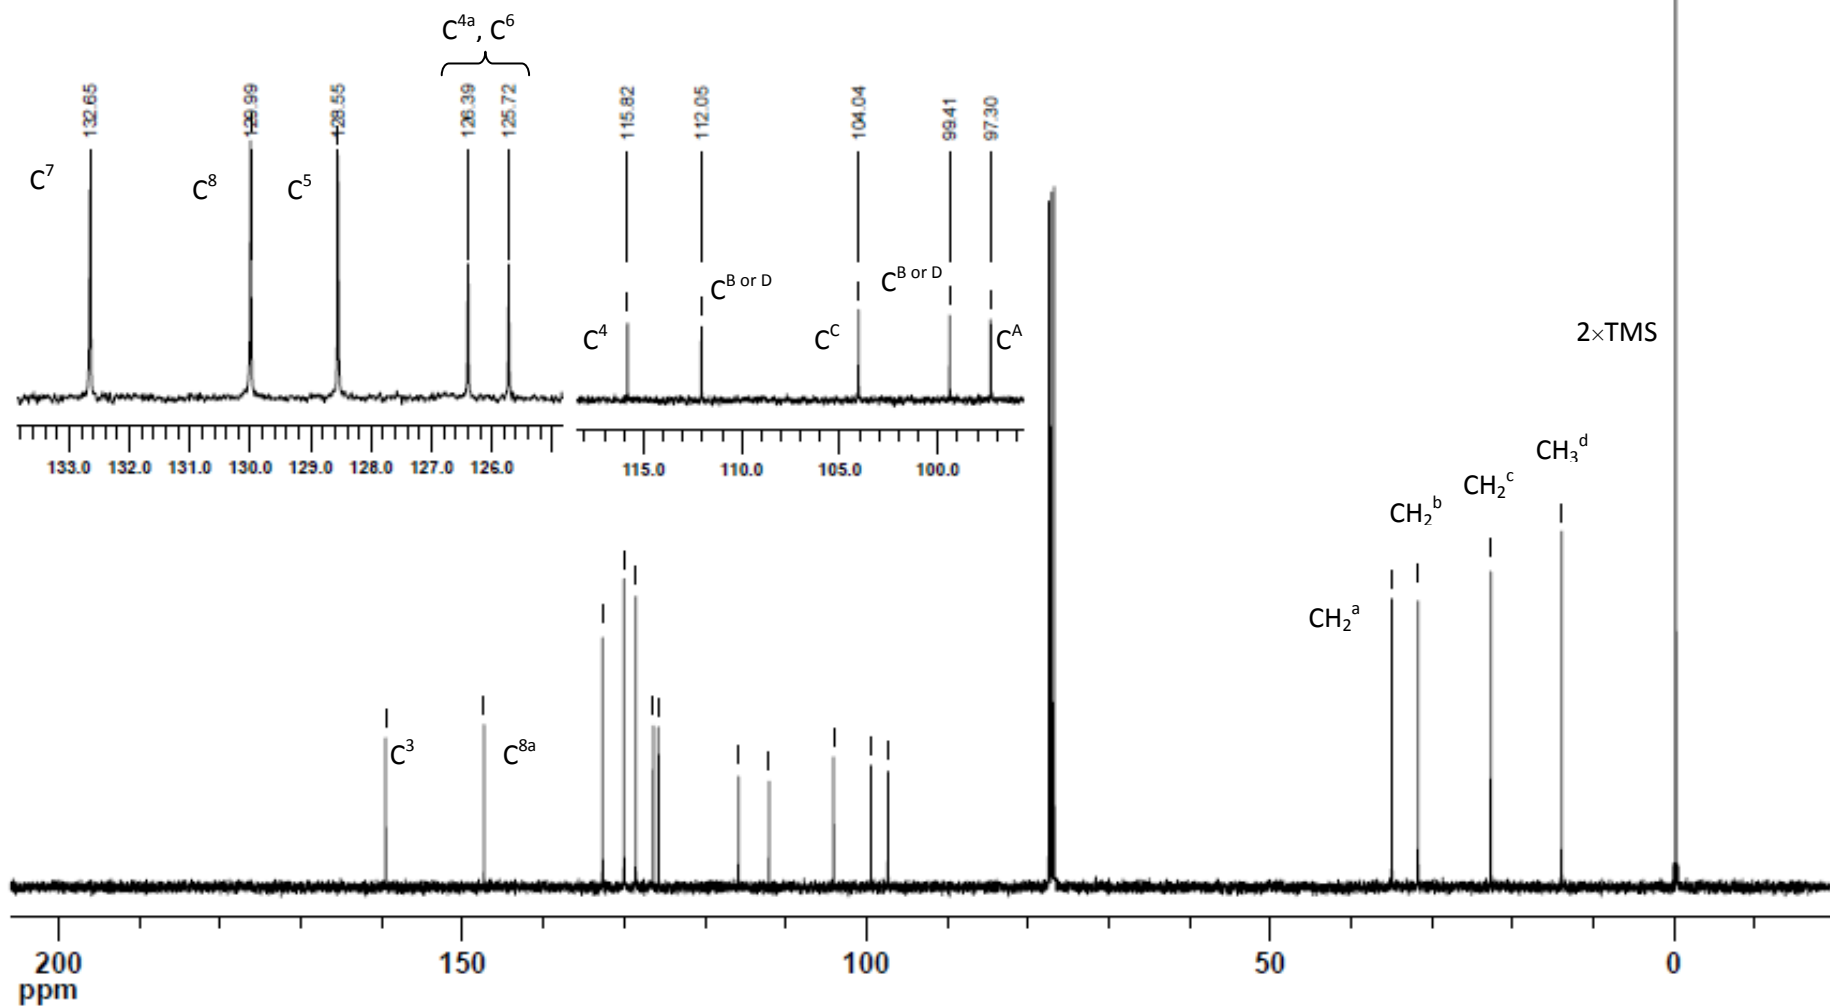

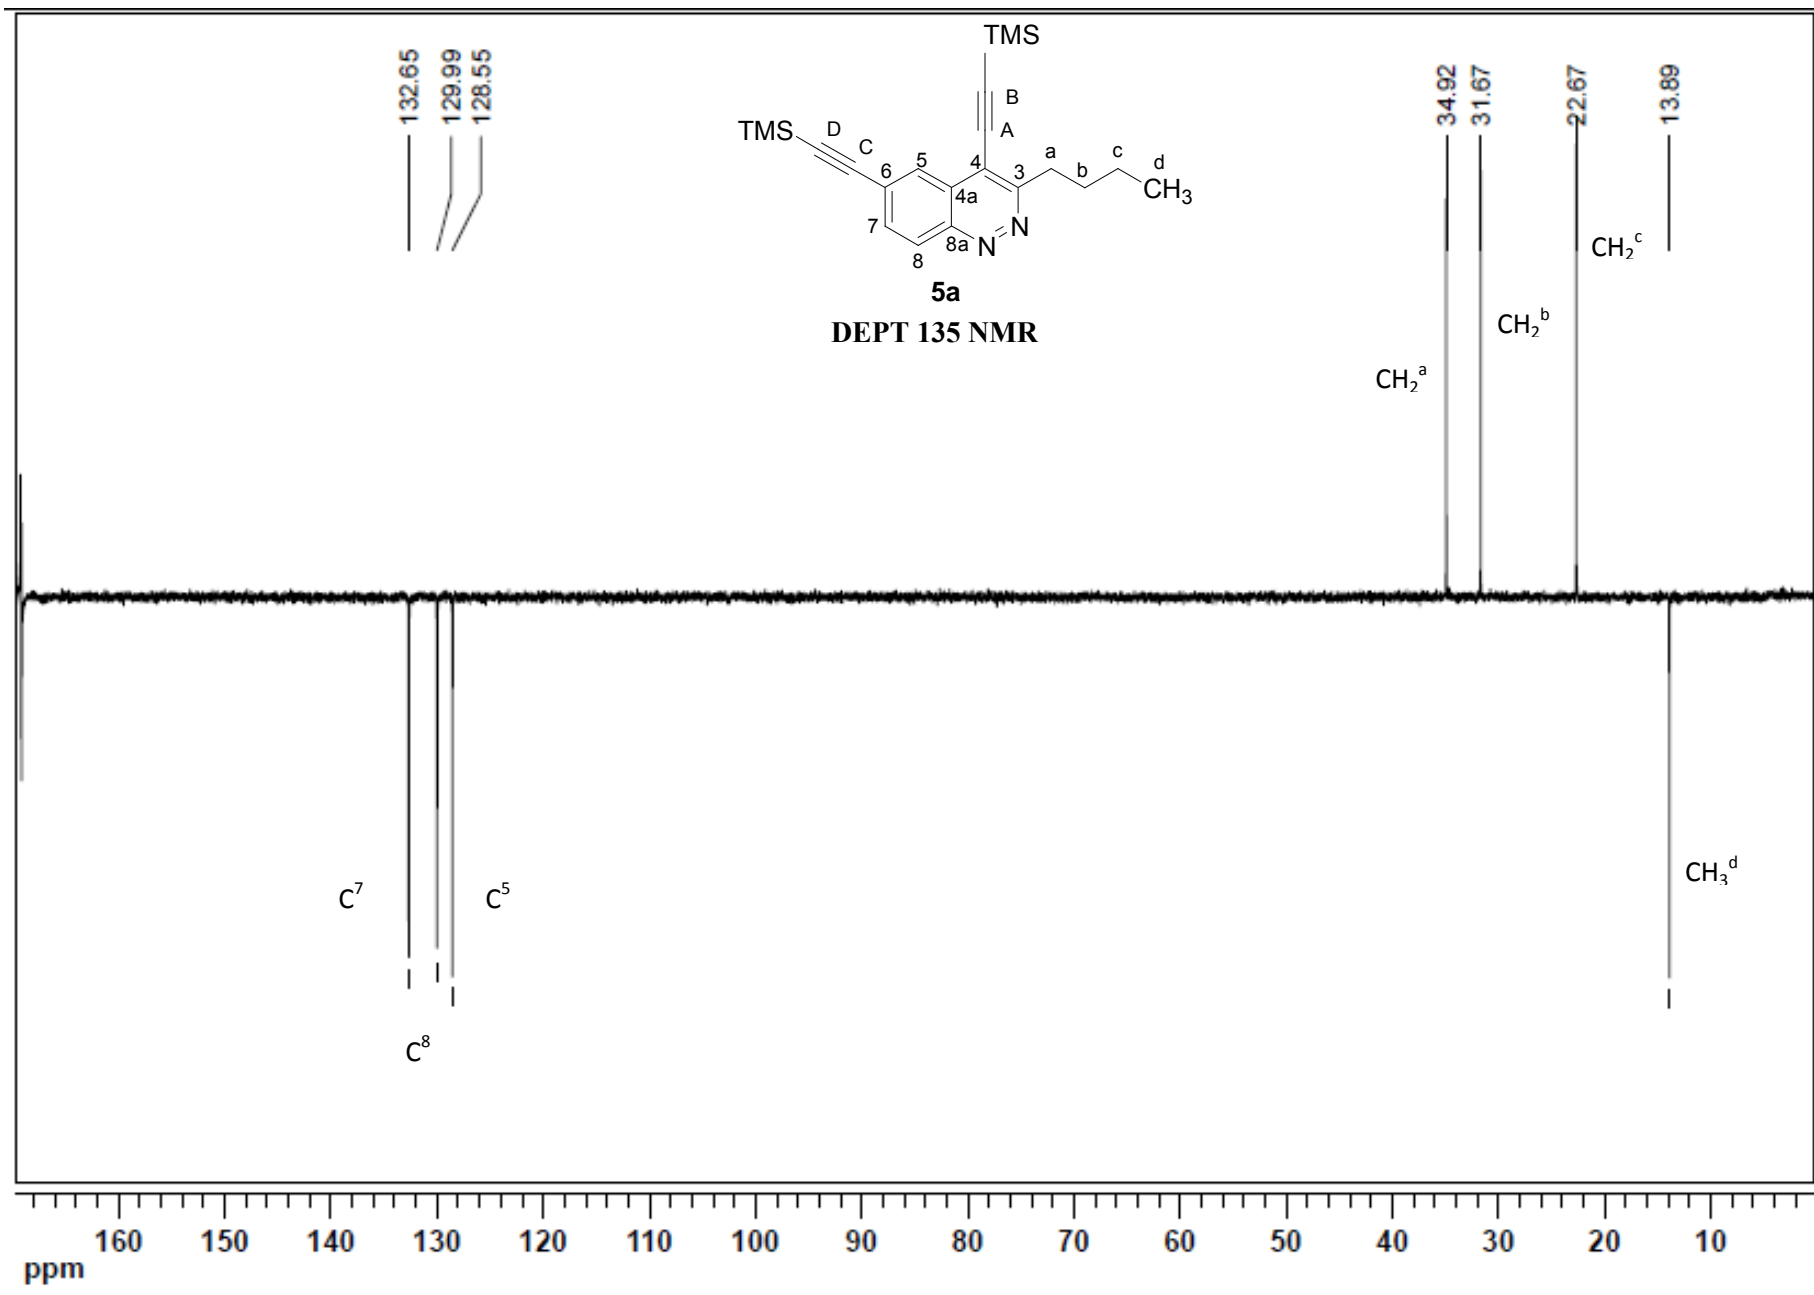

HSQC NMR

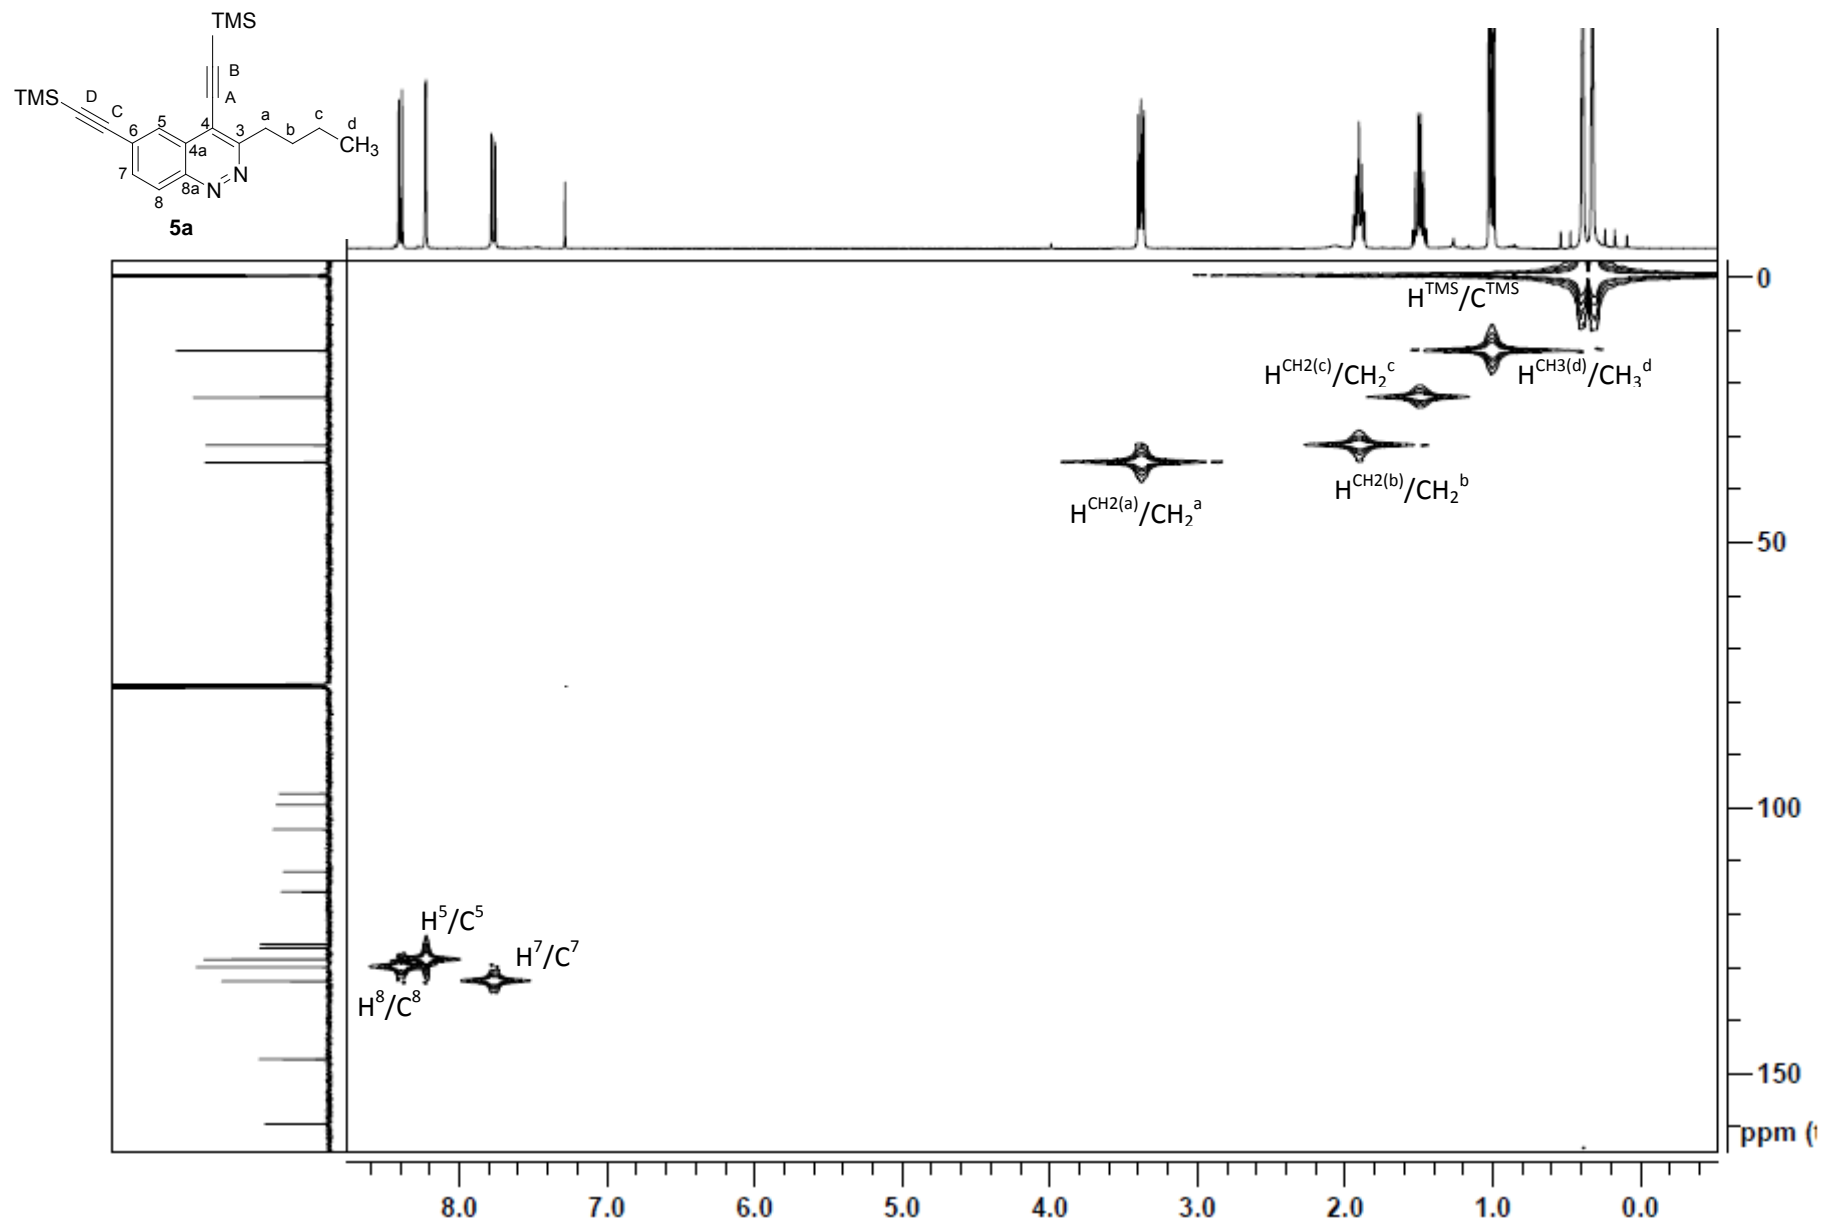

HMBC NMR

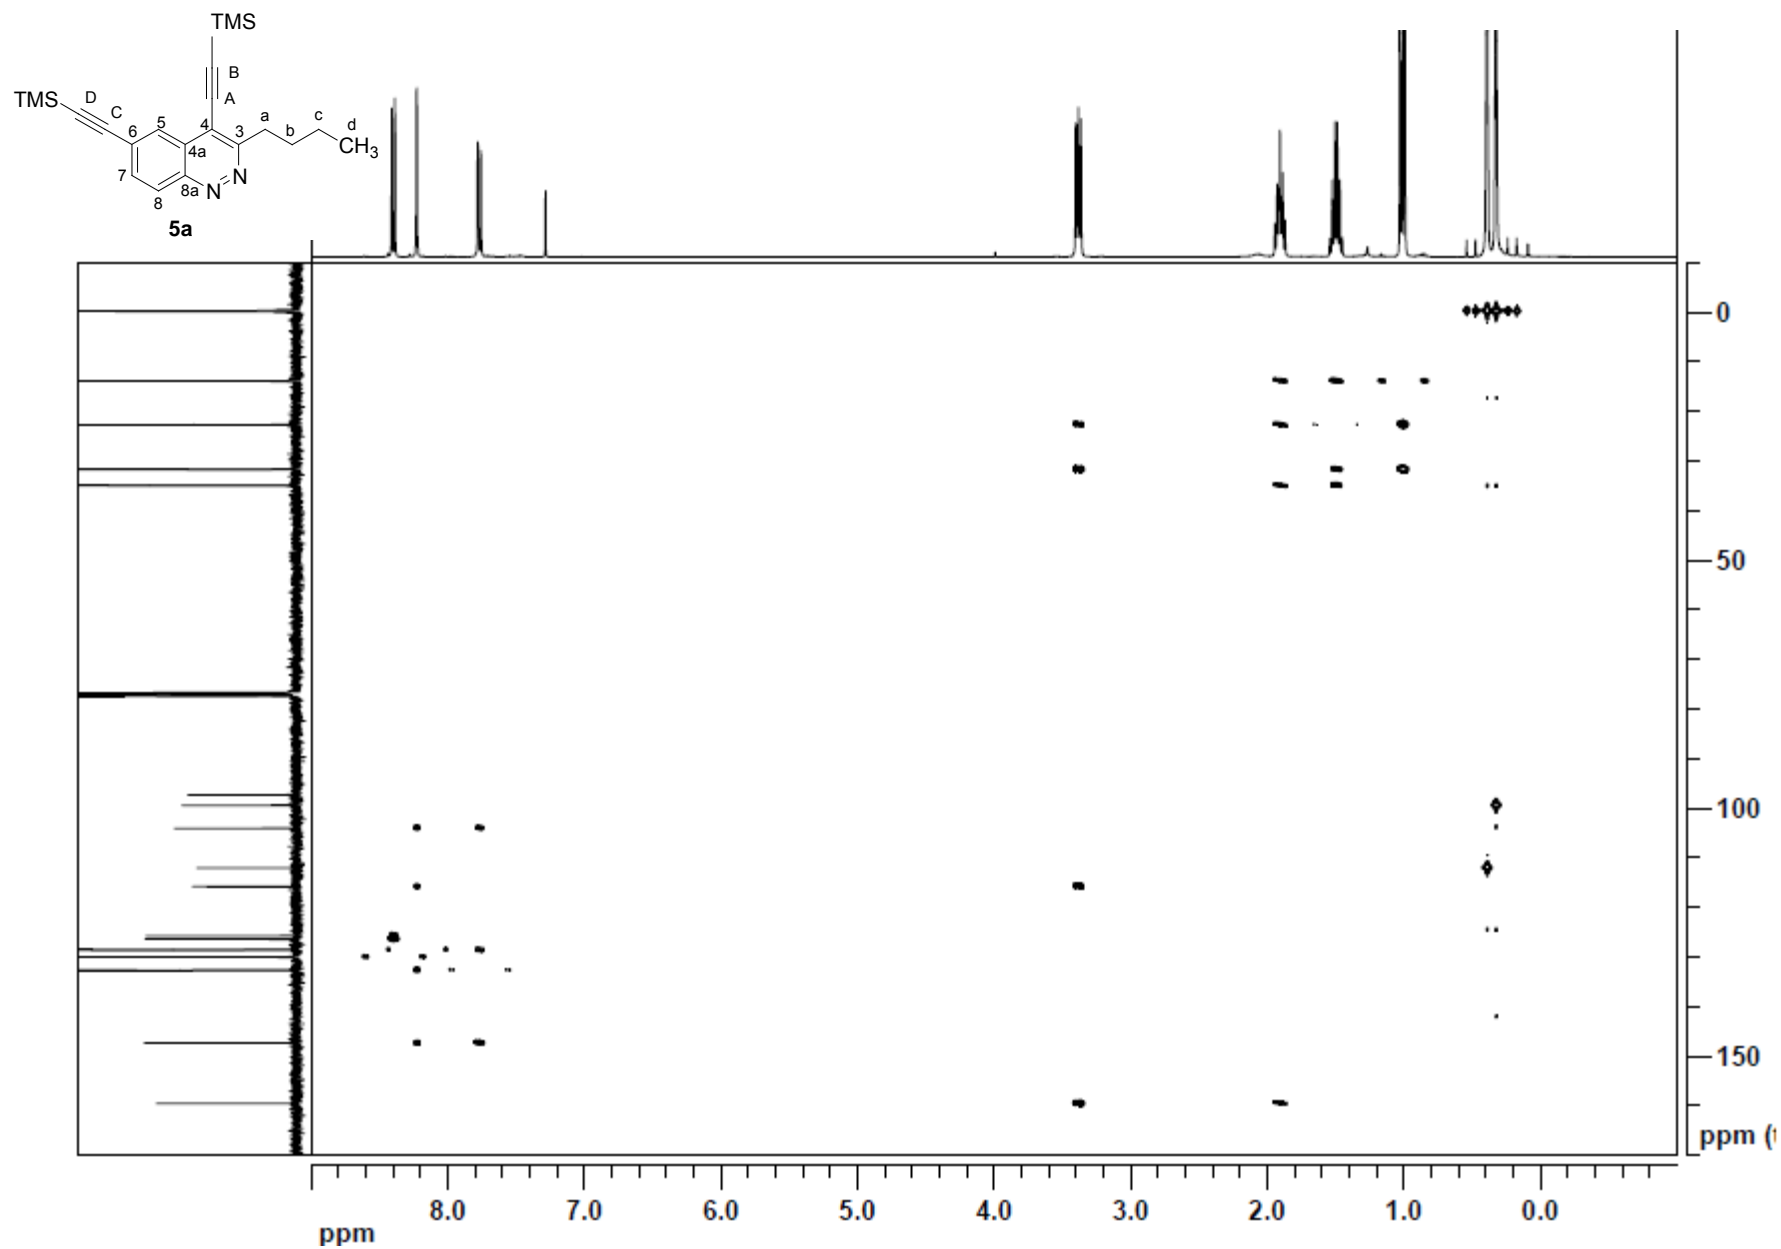



HMBC NMR (Zoom 1)

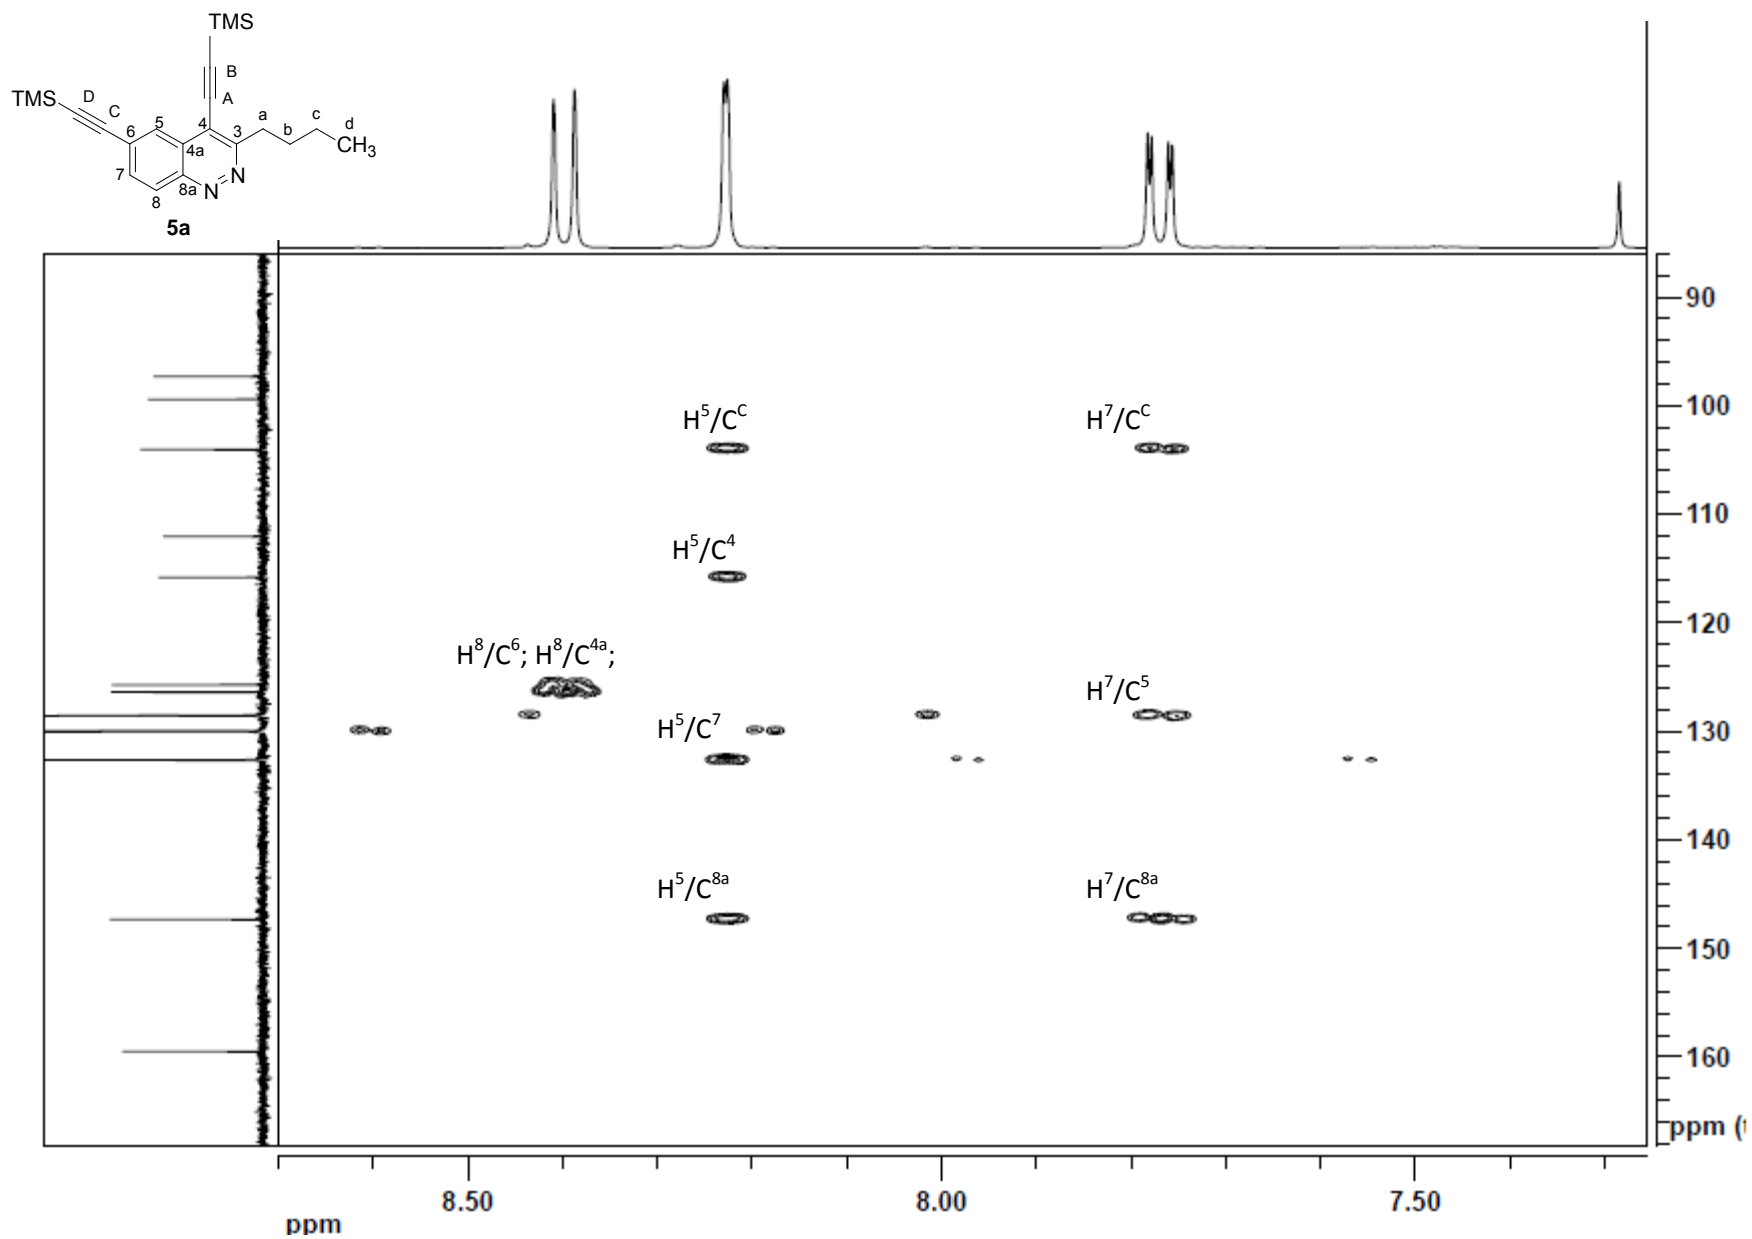

HMBC NMR (Zoom\_1)

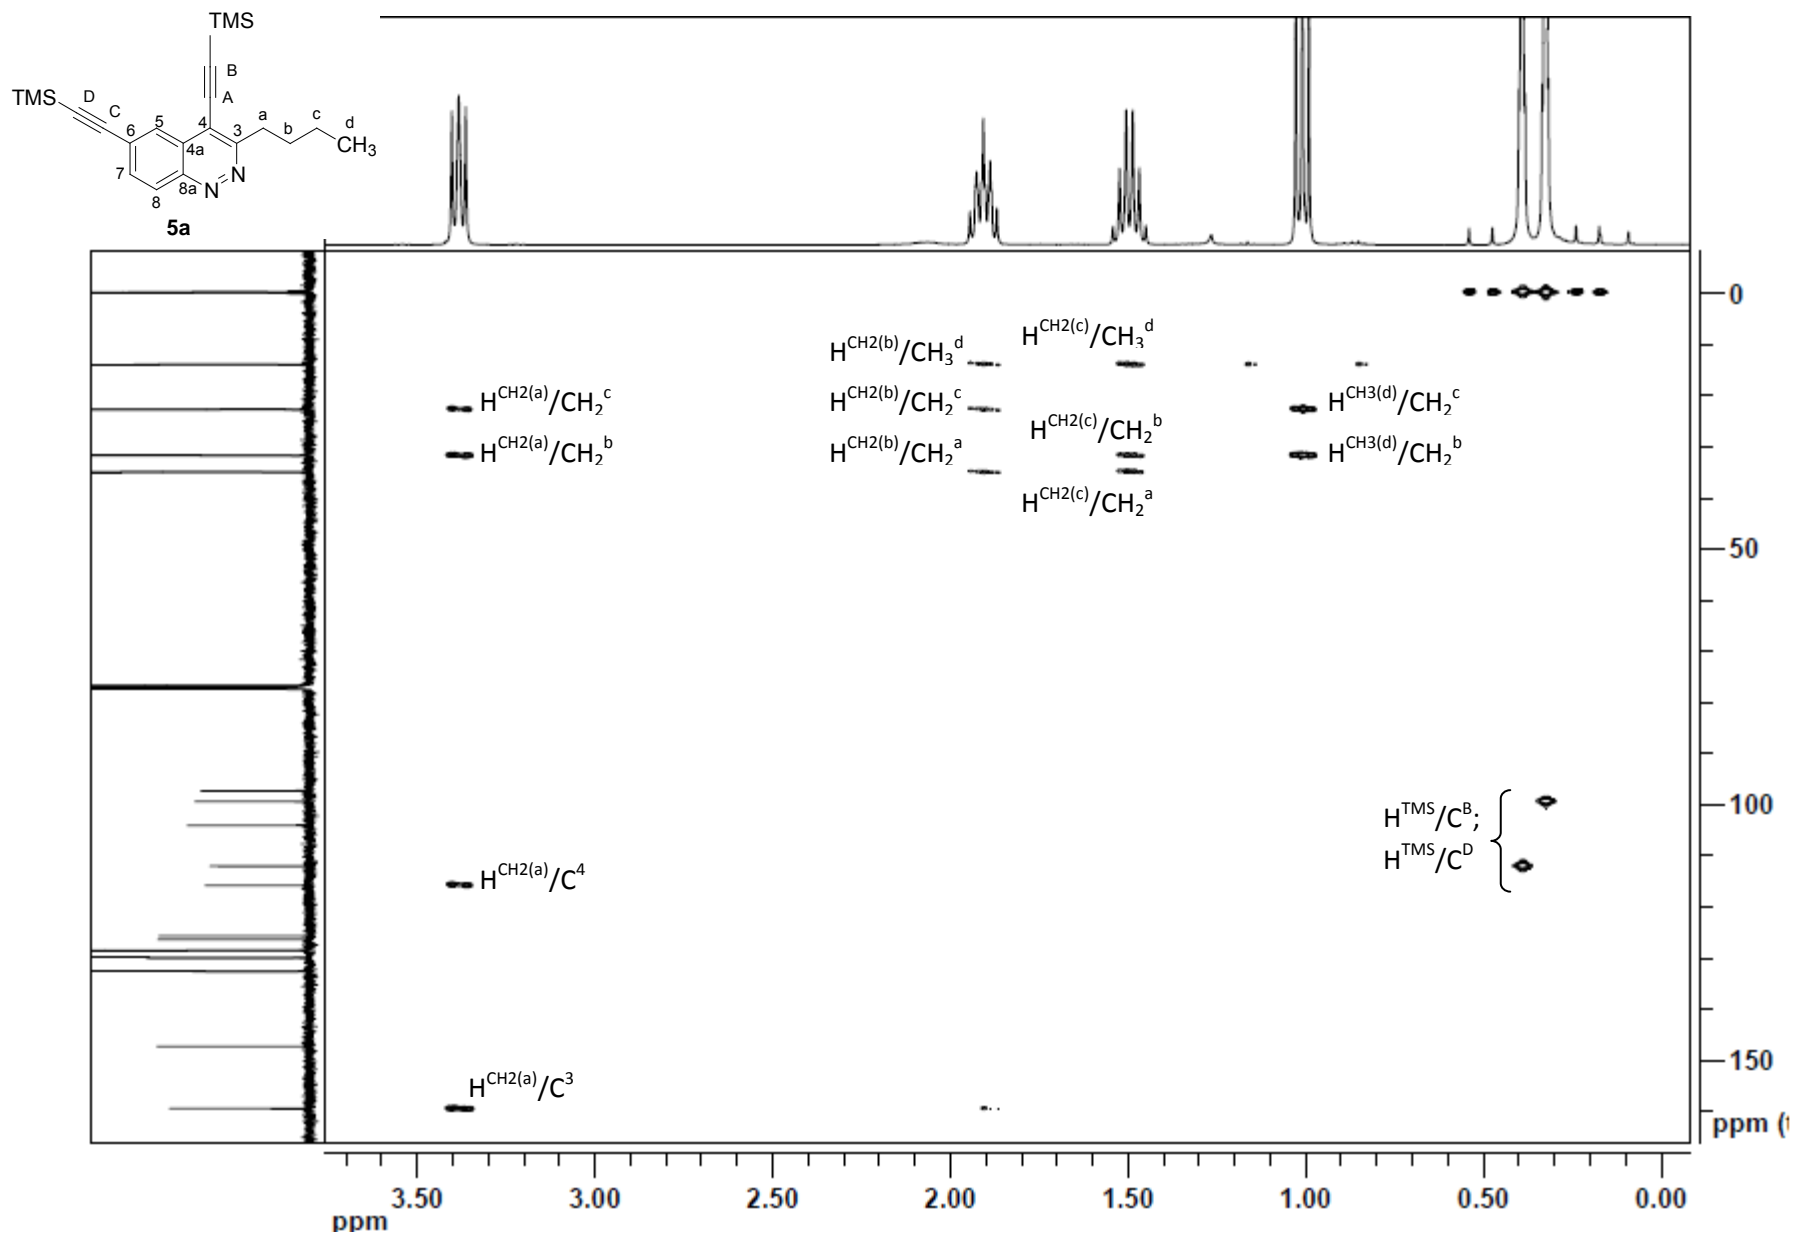

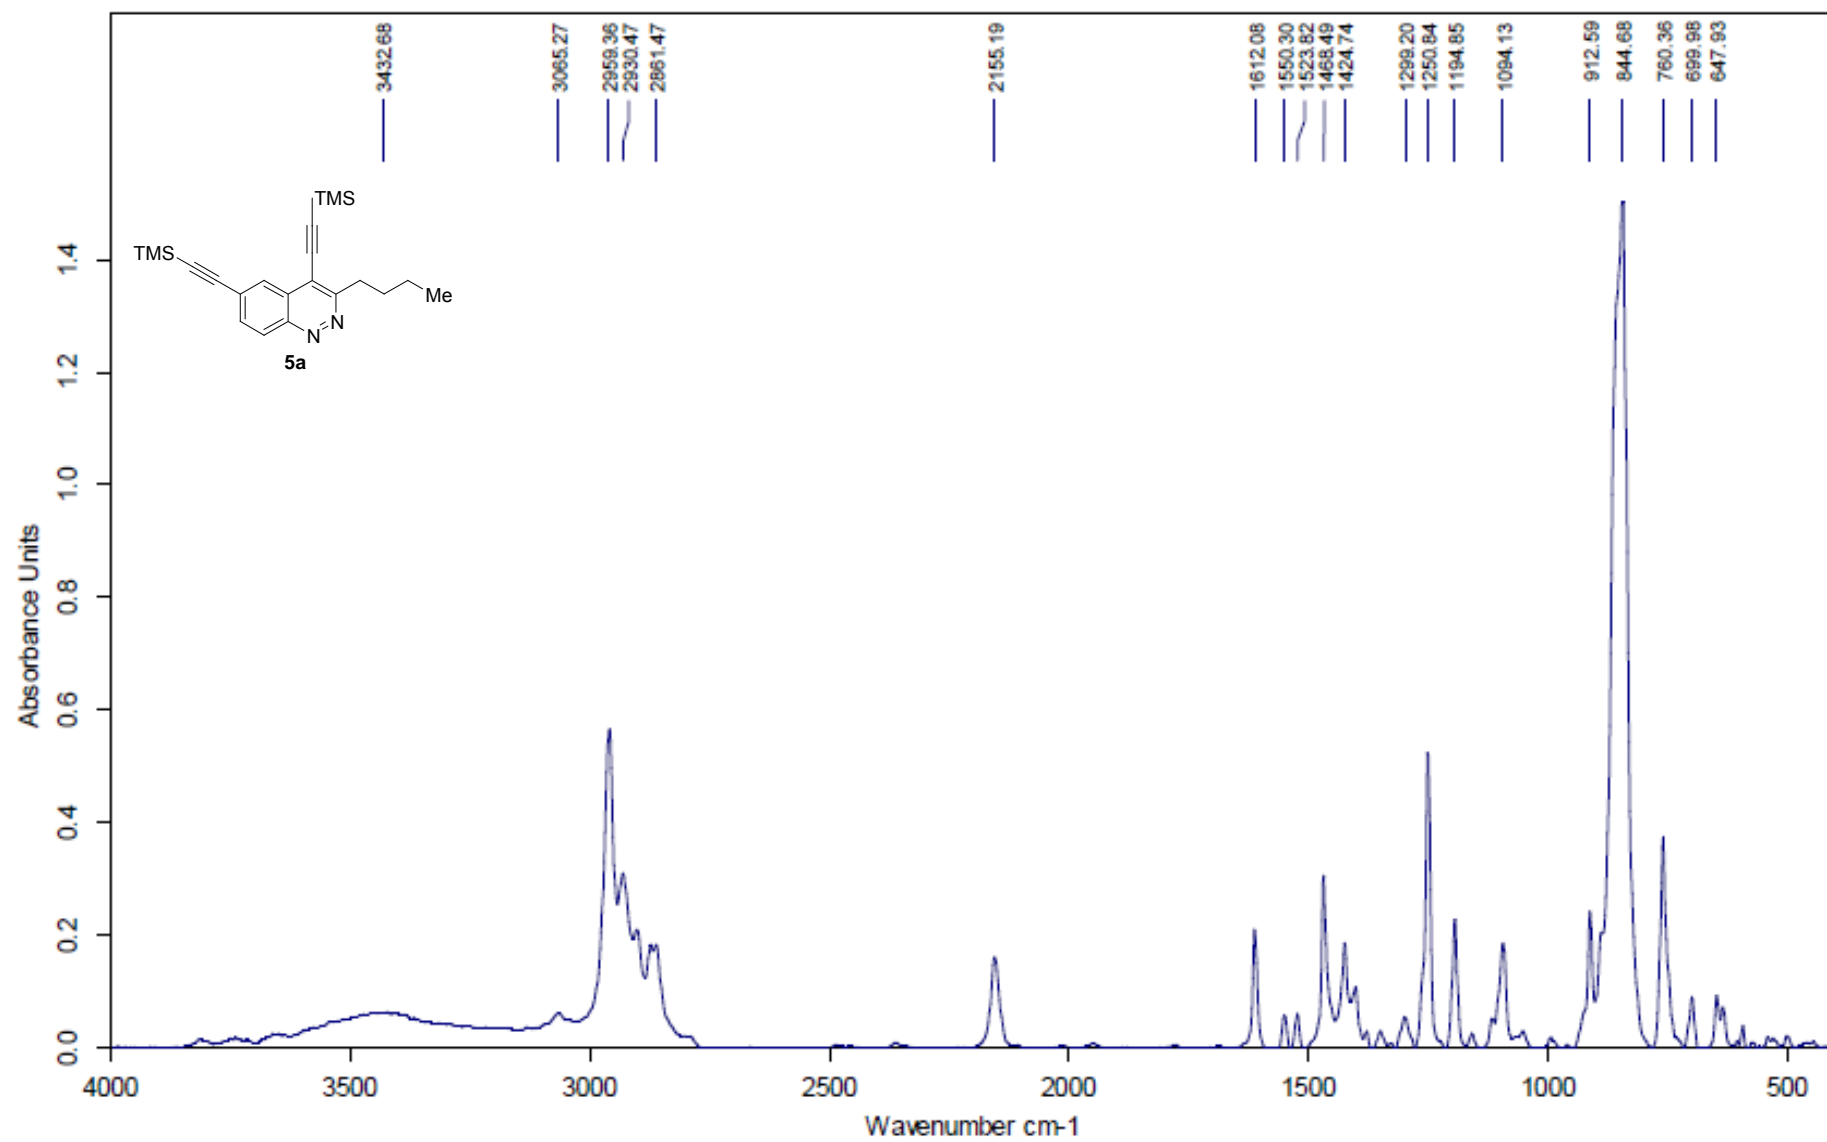

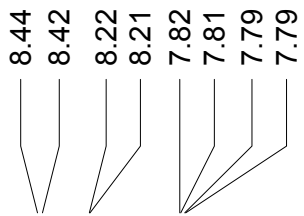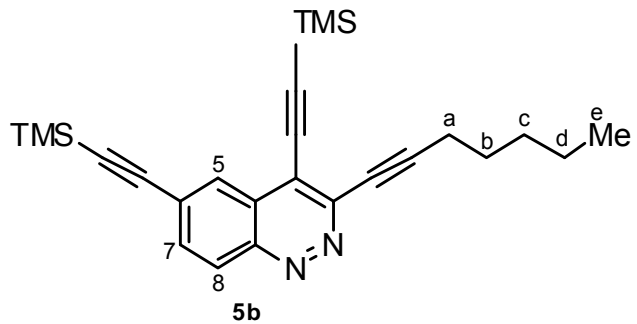

<sup>1</sup>H NMR, 400 MHz

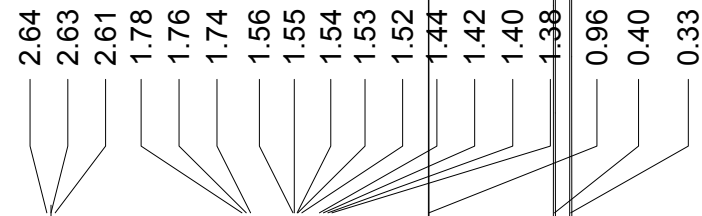

H<sup>8</sup>

H<sup>6</sup>

H<sup>7</sup>

a

b

c

d

e

1.00  
0.96  
1.01

2.04  
2.22  
2.10  
2.10  
3.07  
9.15

ppm

8.0 7.0 6.0 5.0 4.0 3.0 2.0 1.0 0.0

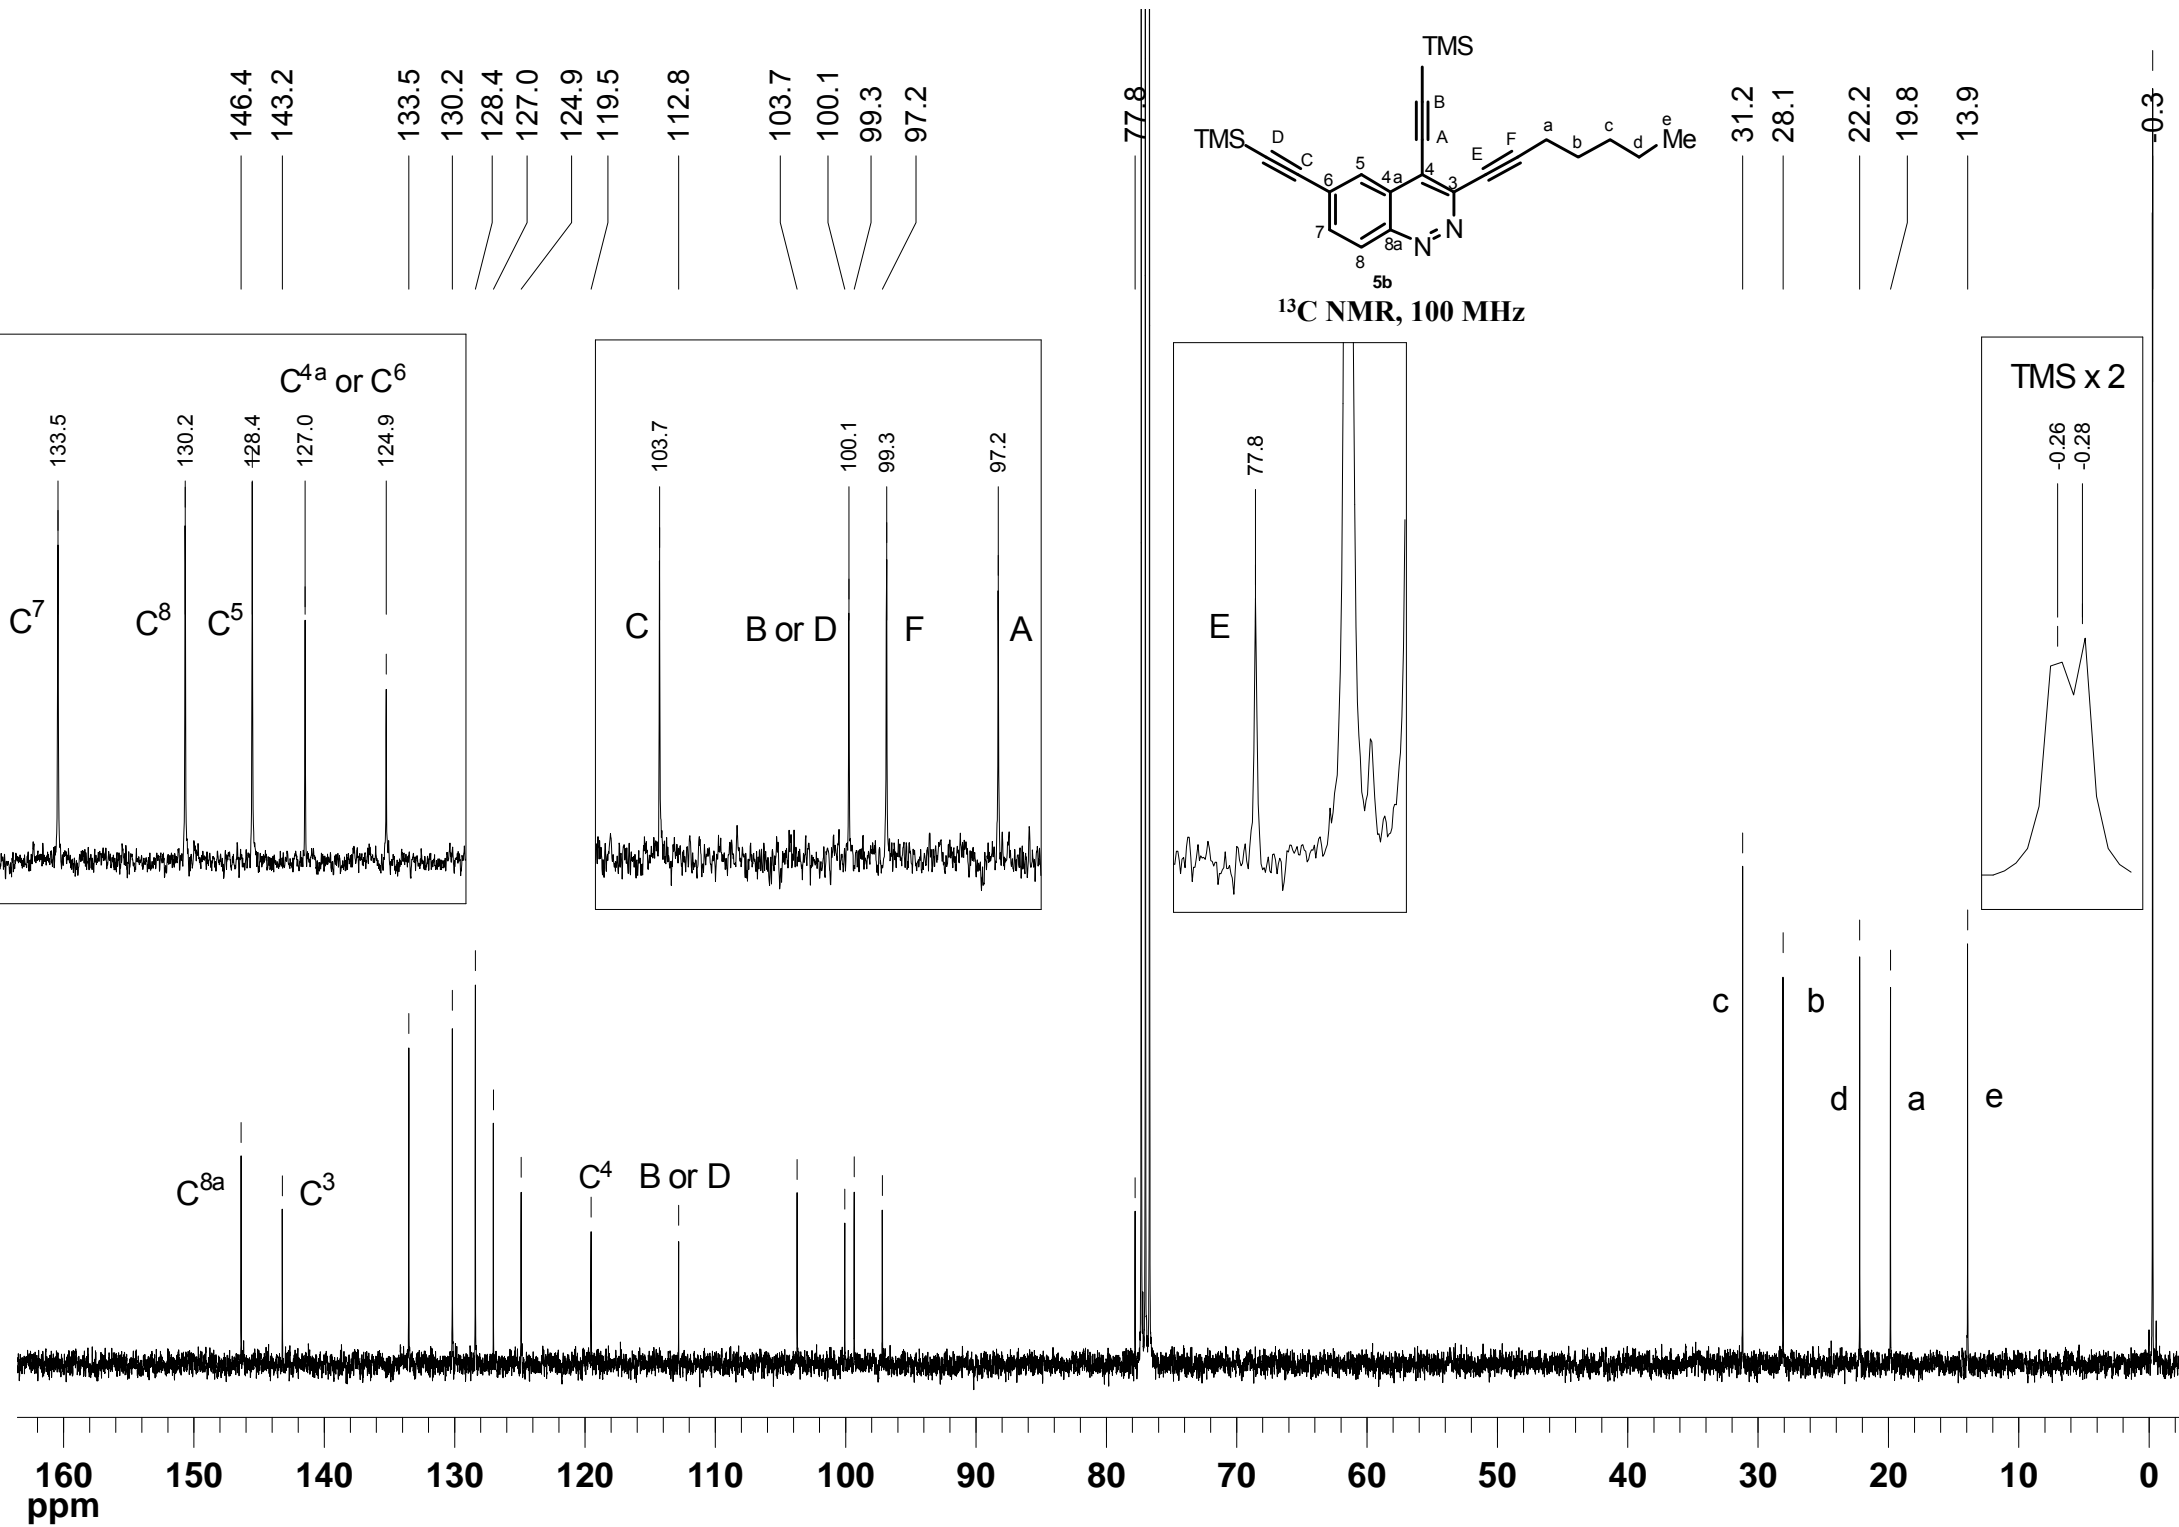

HMBC NMR

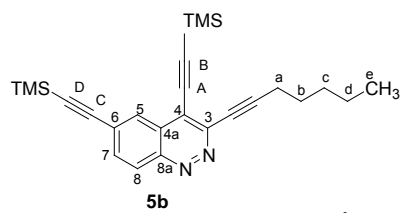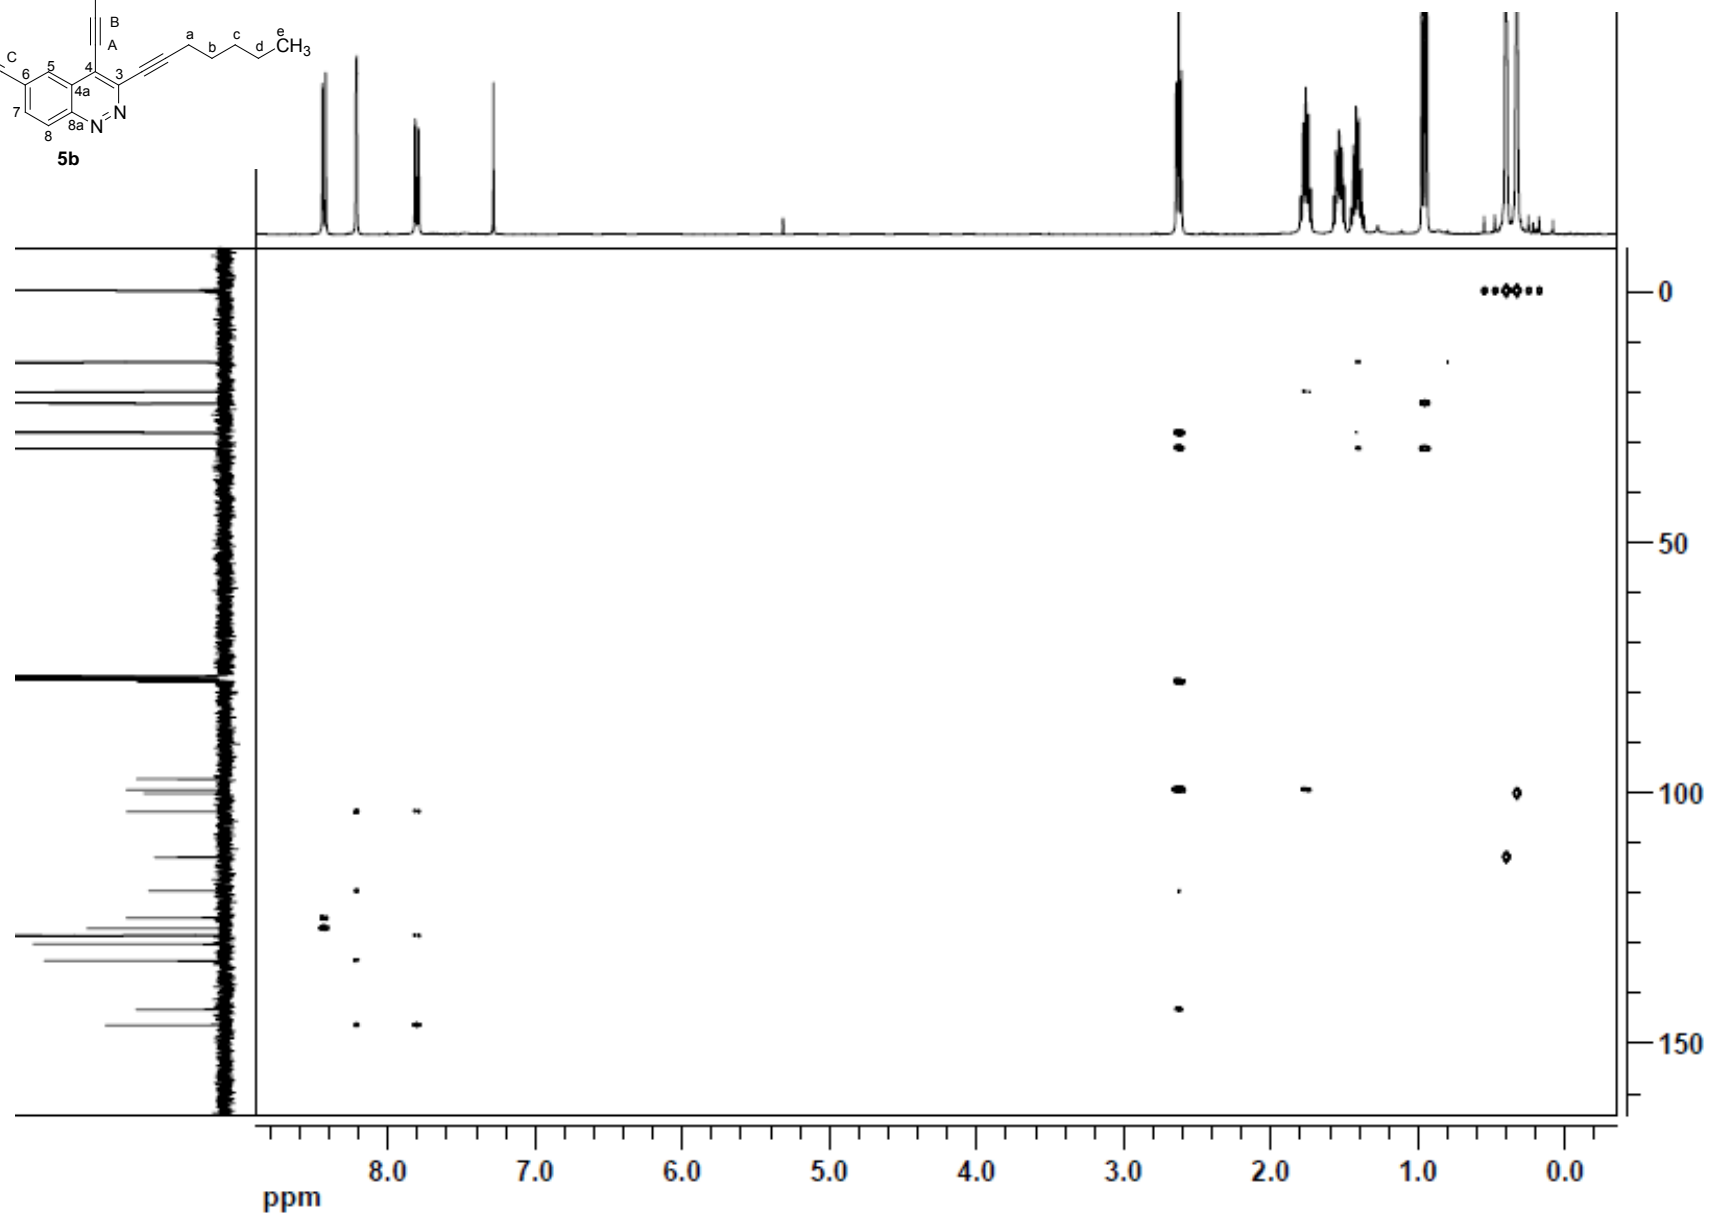

HMBC NMR (Zoom 1)

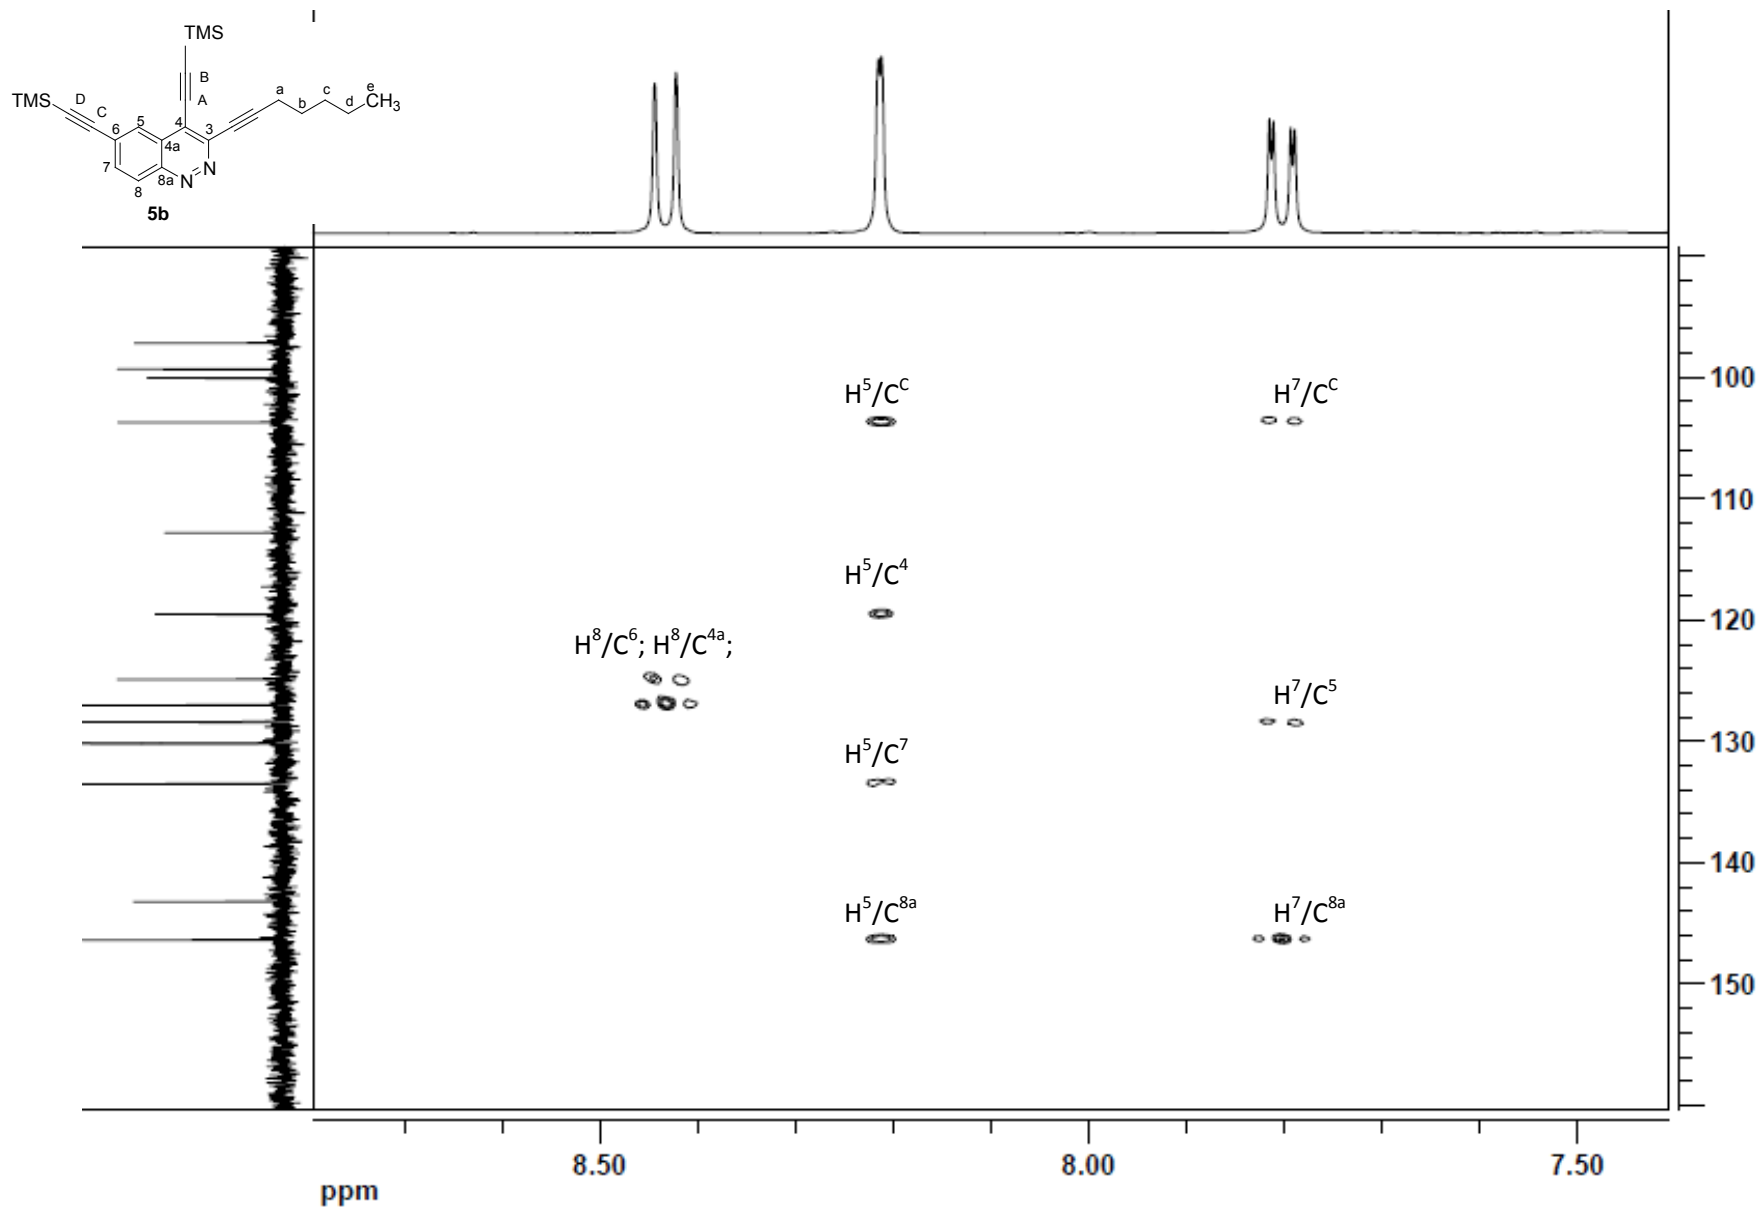

HMBC NMR (Zoom 2)

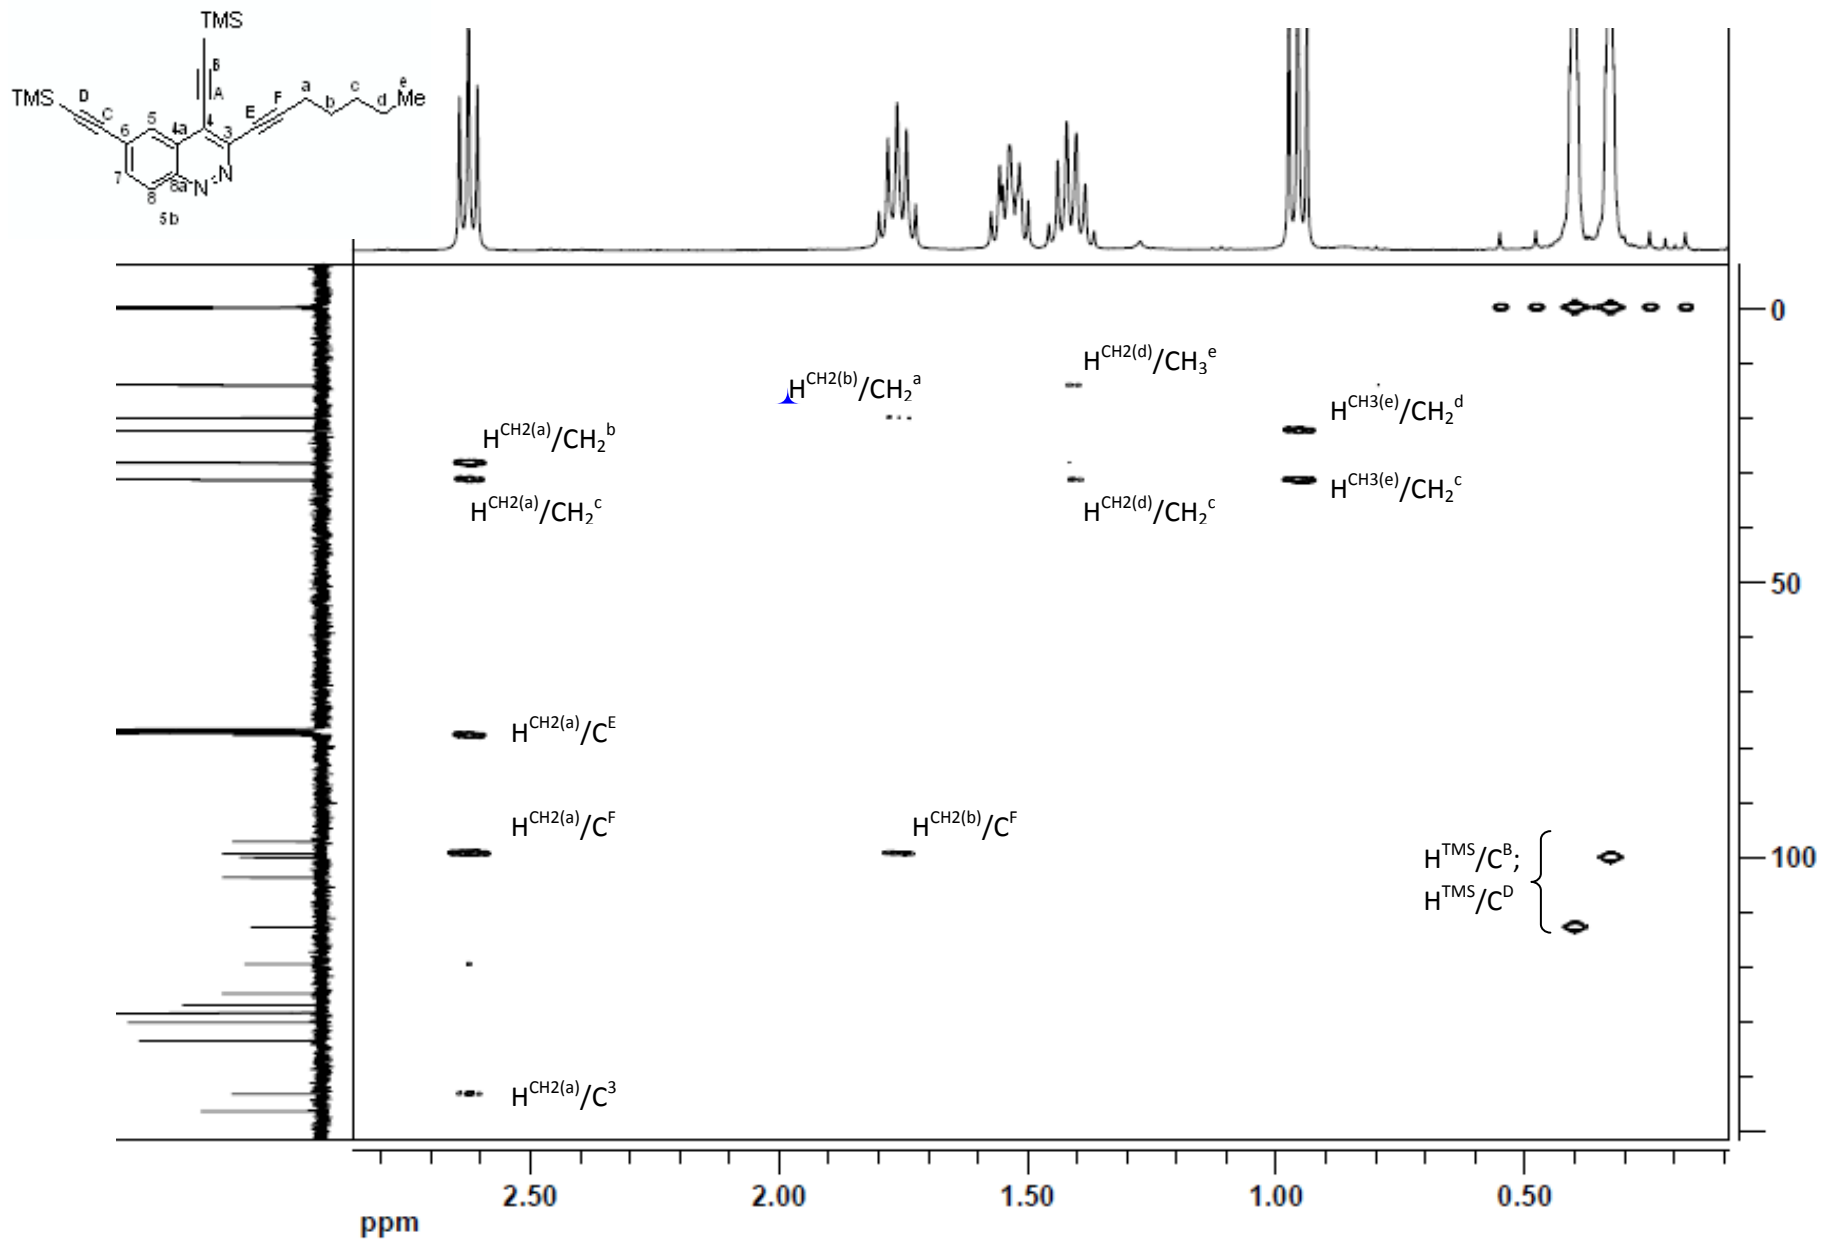



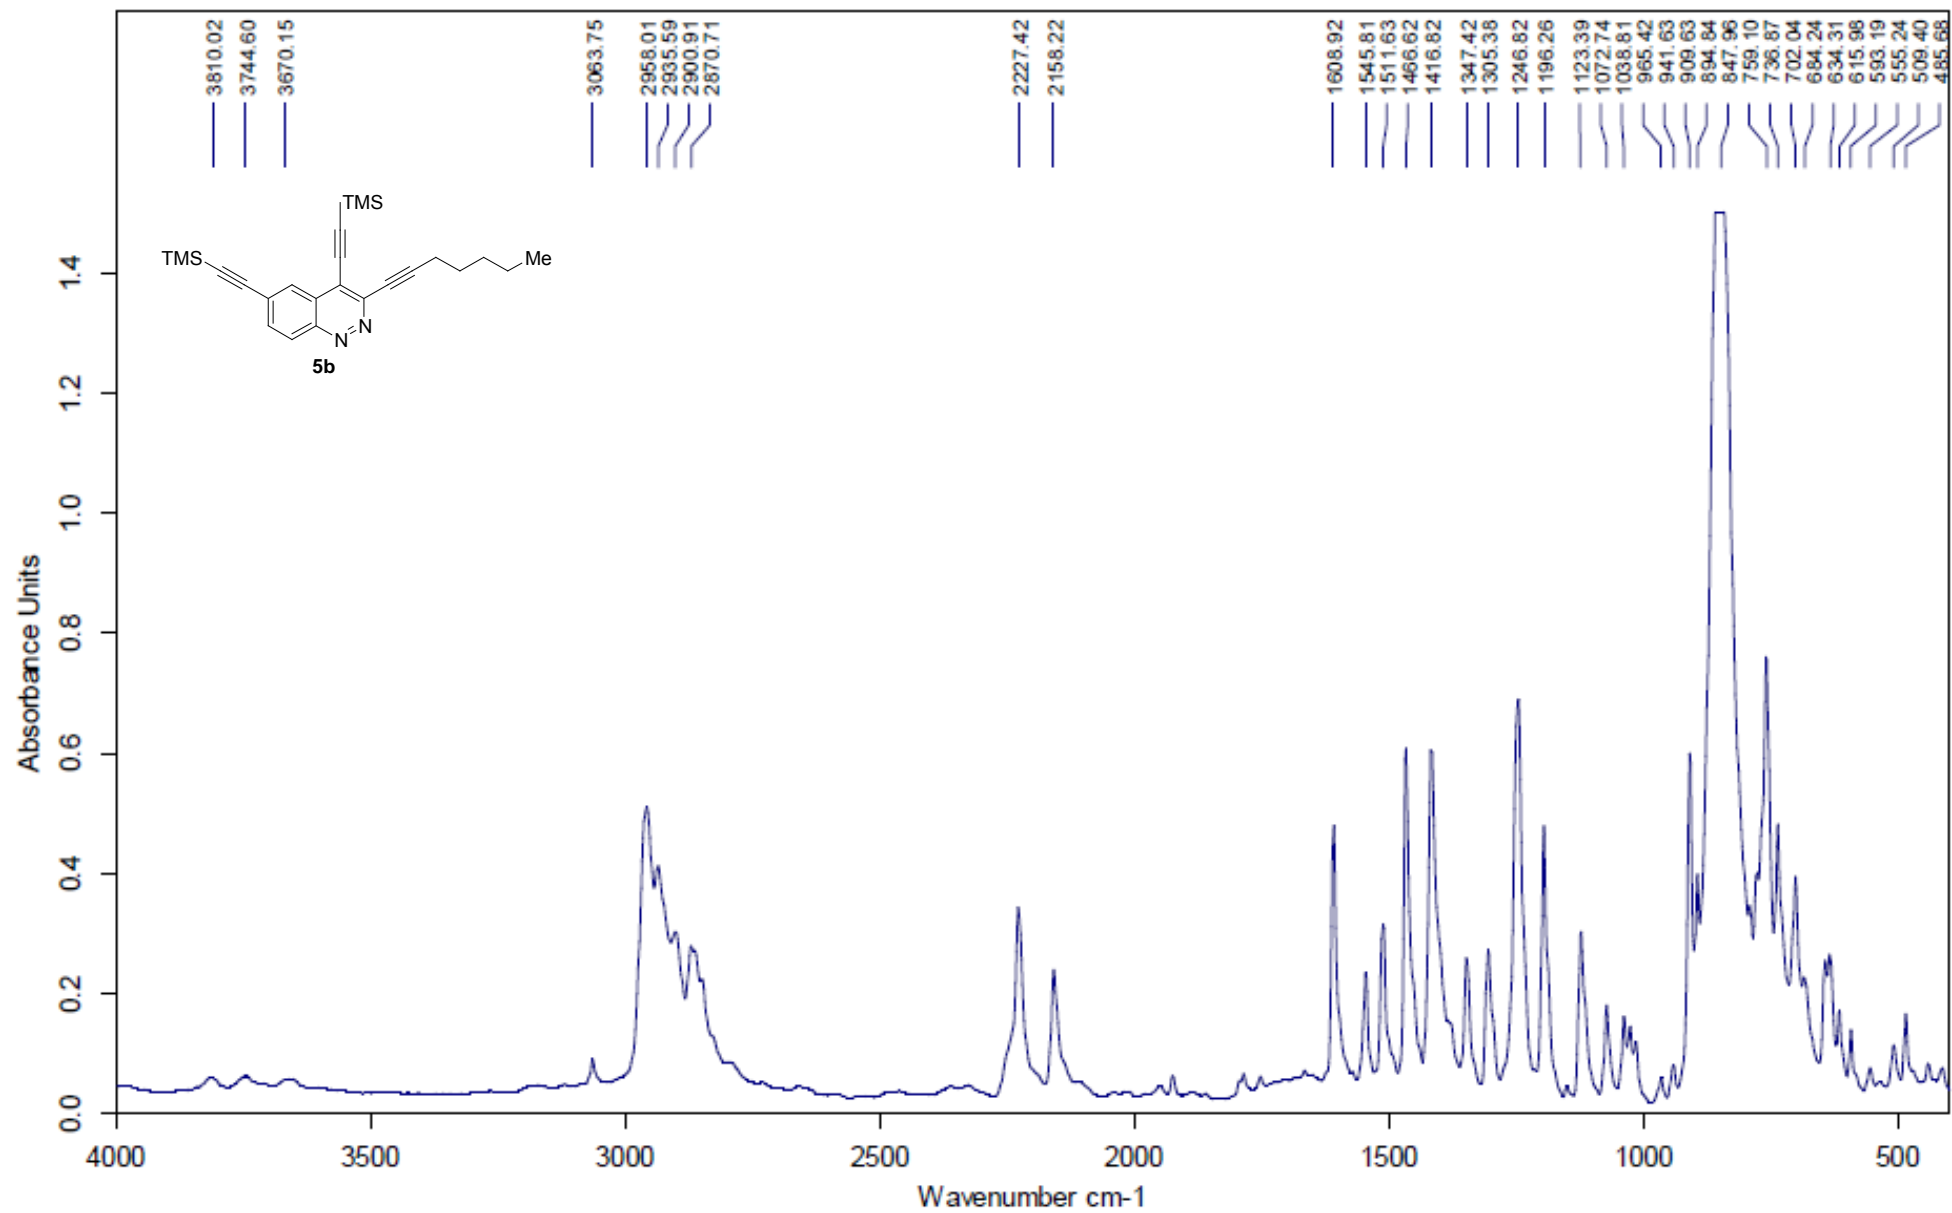

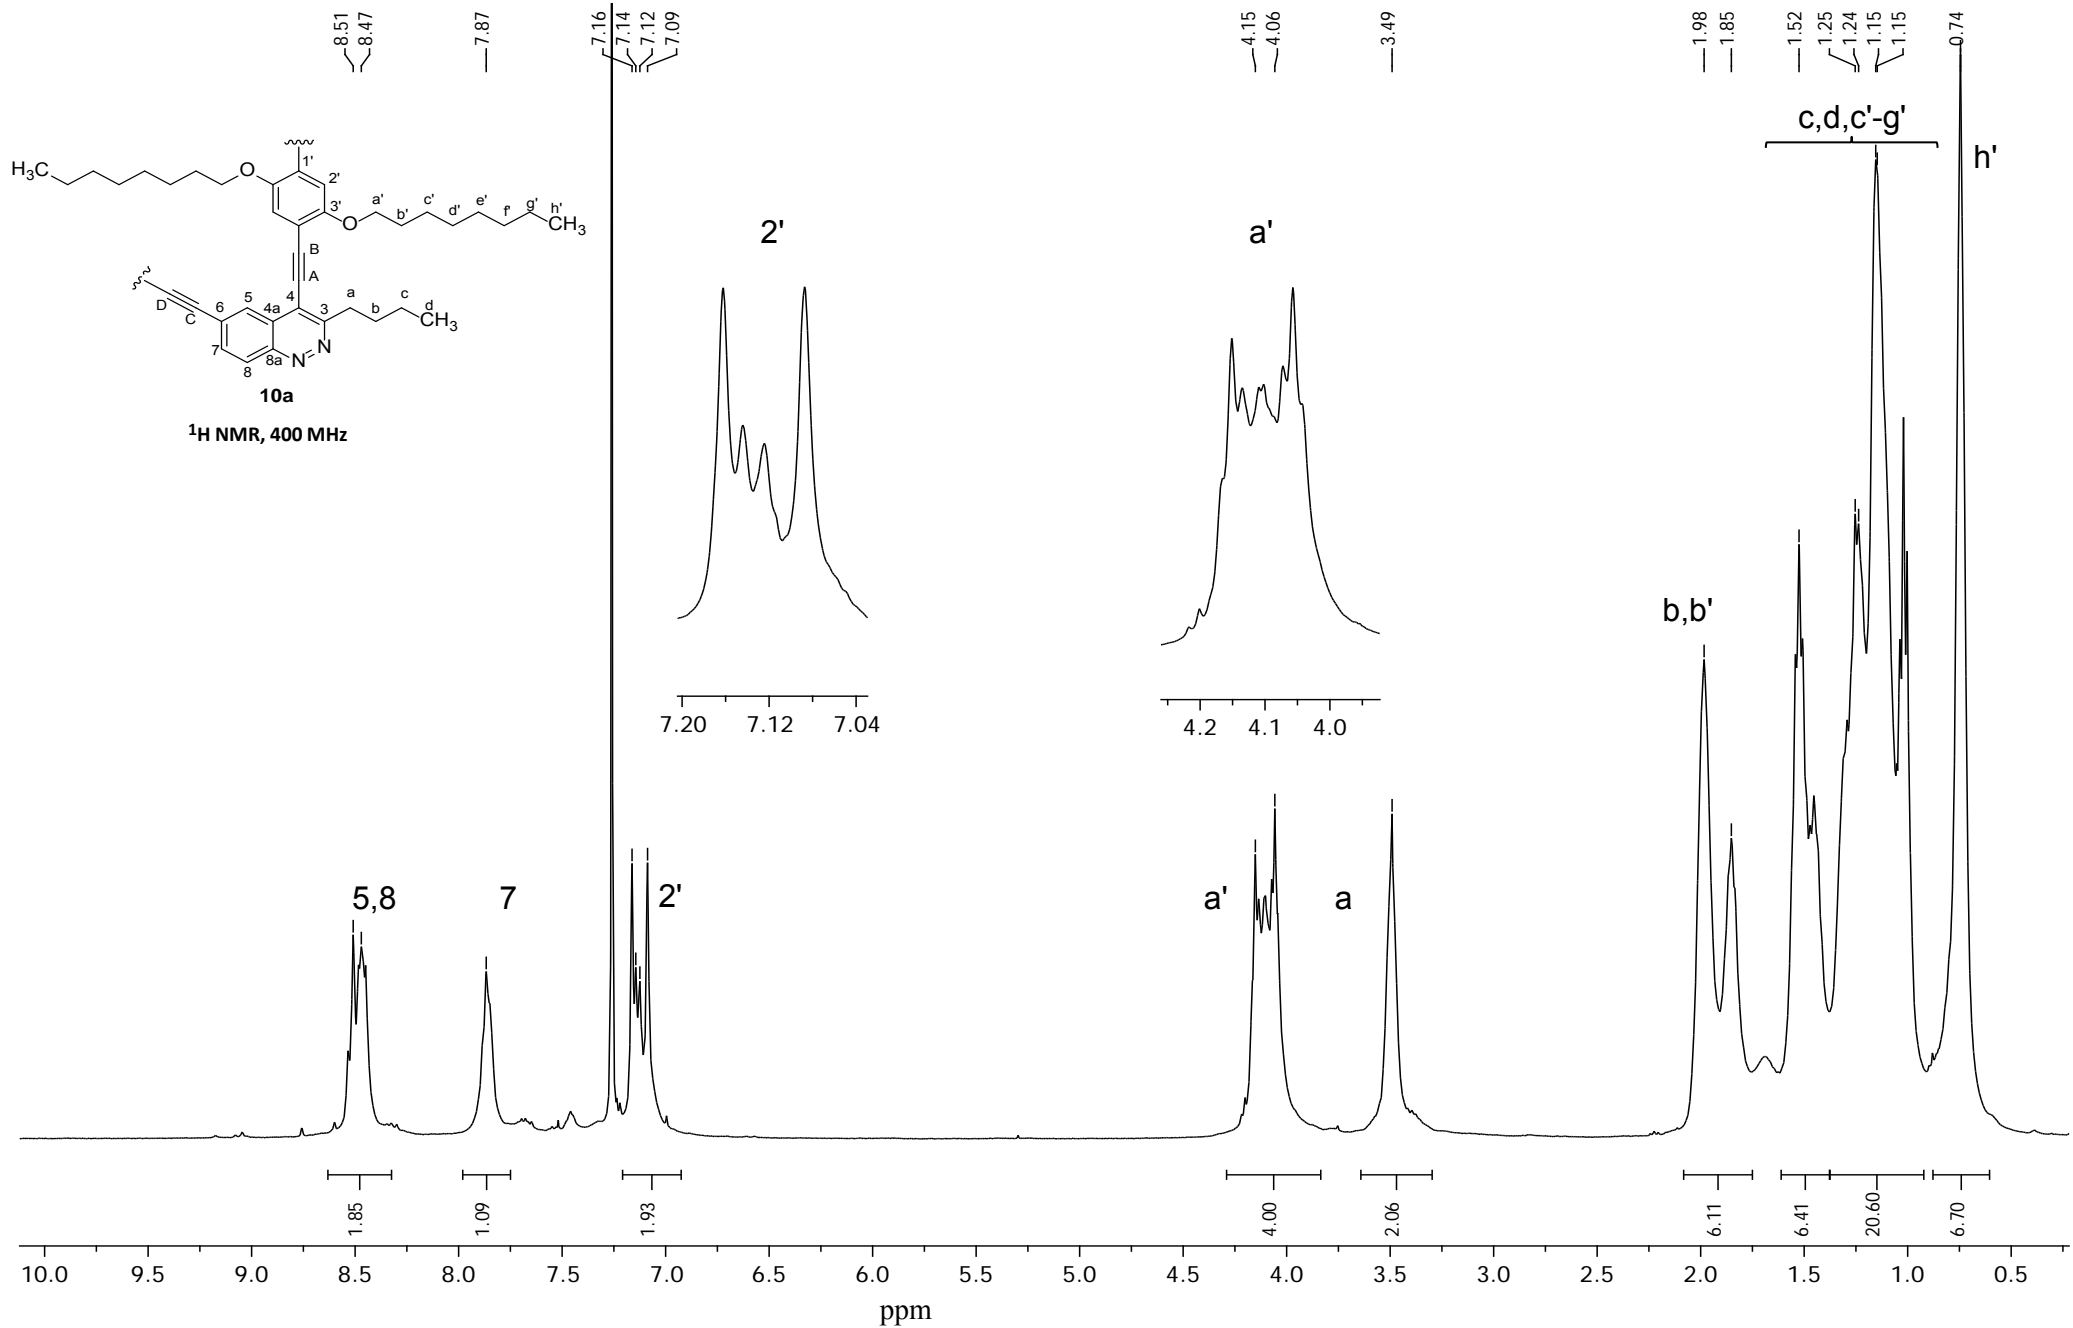

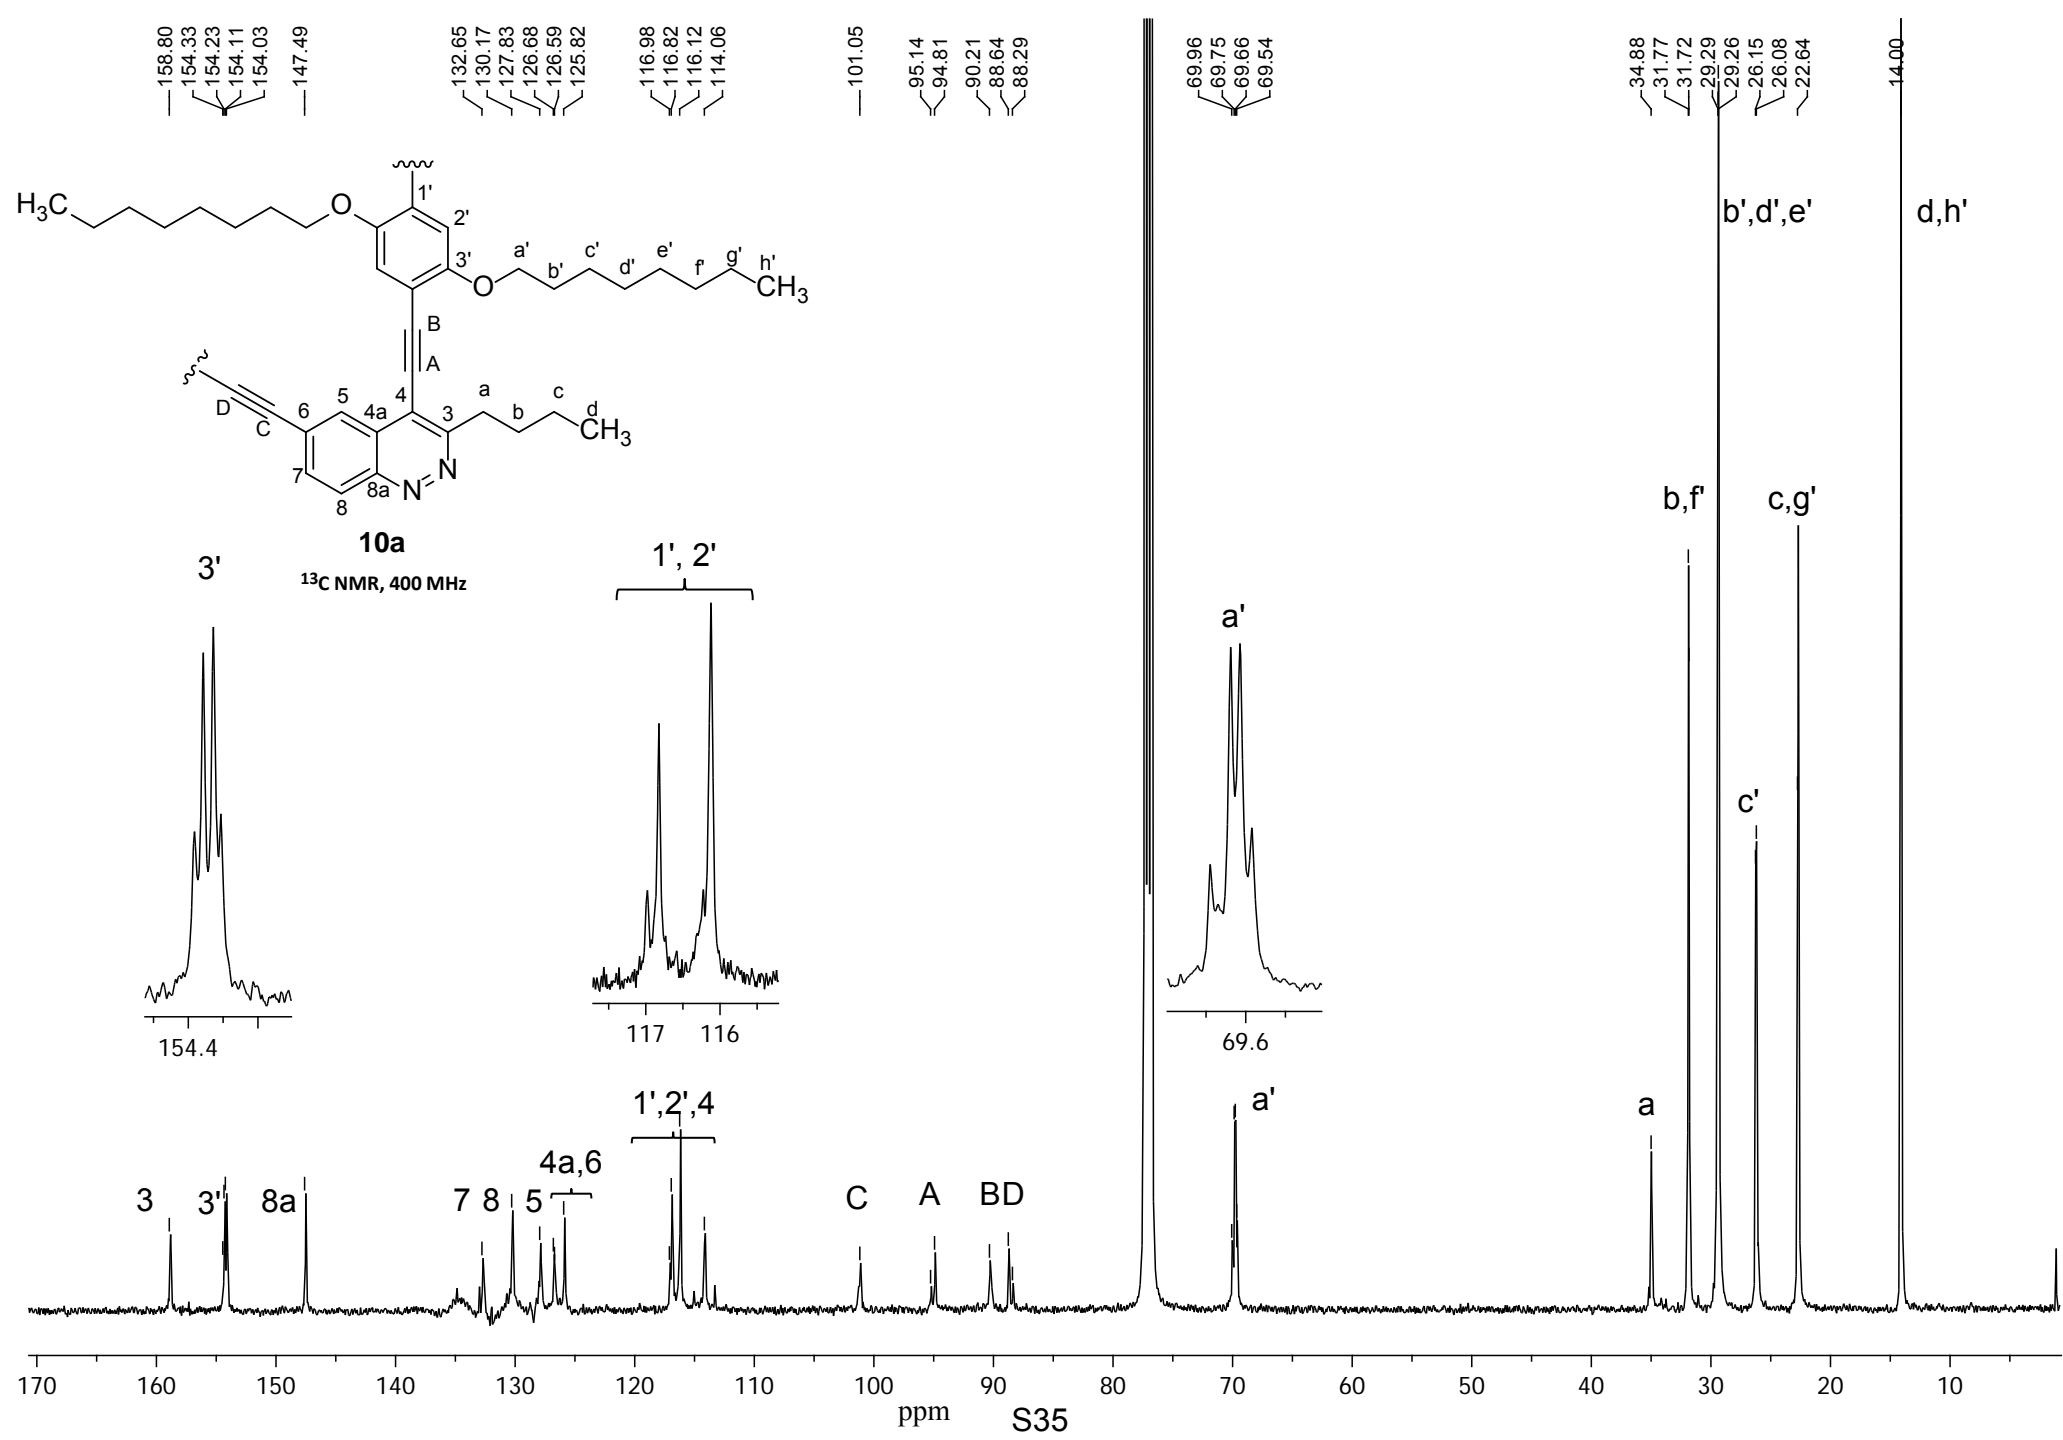

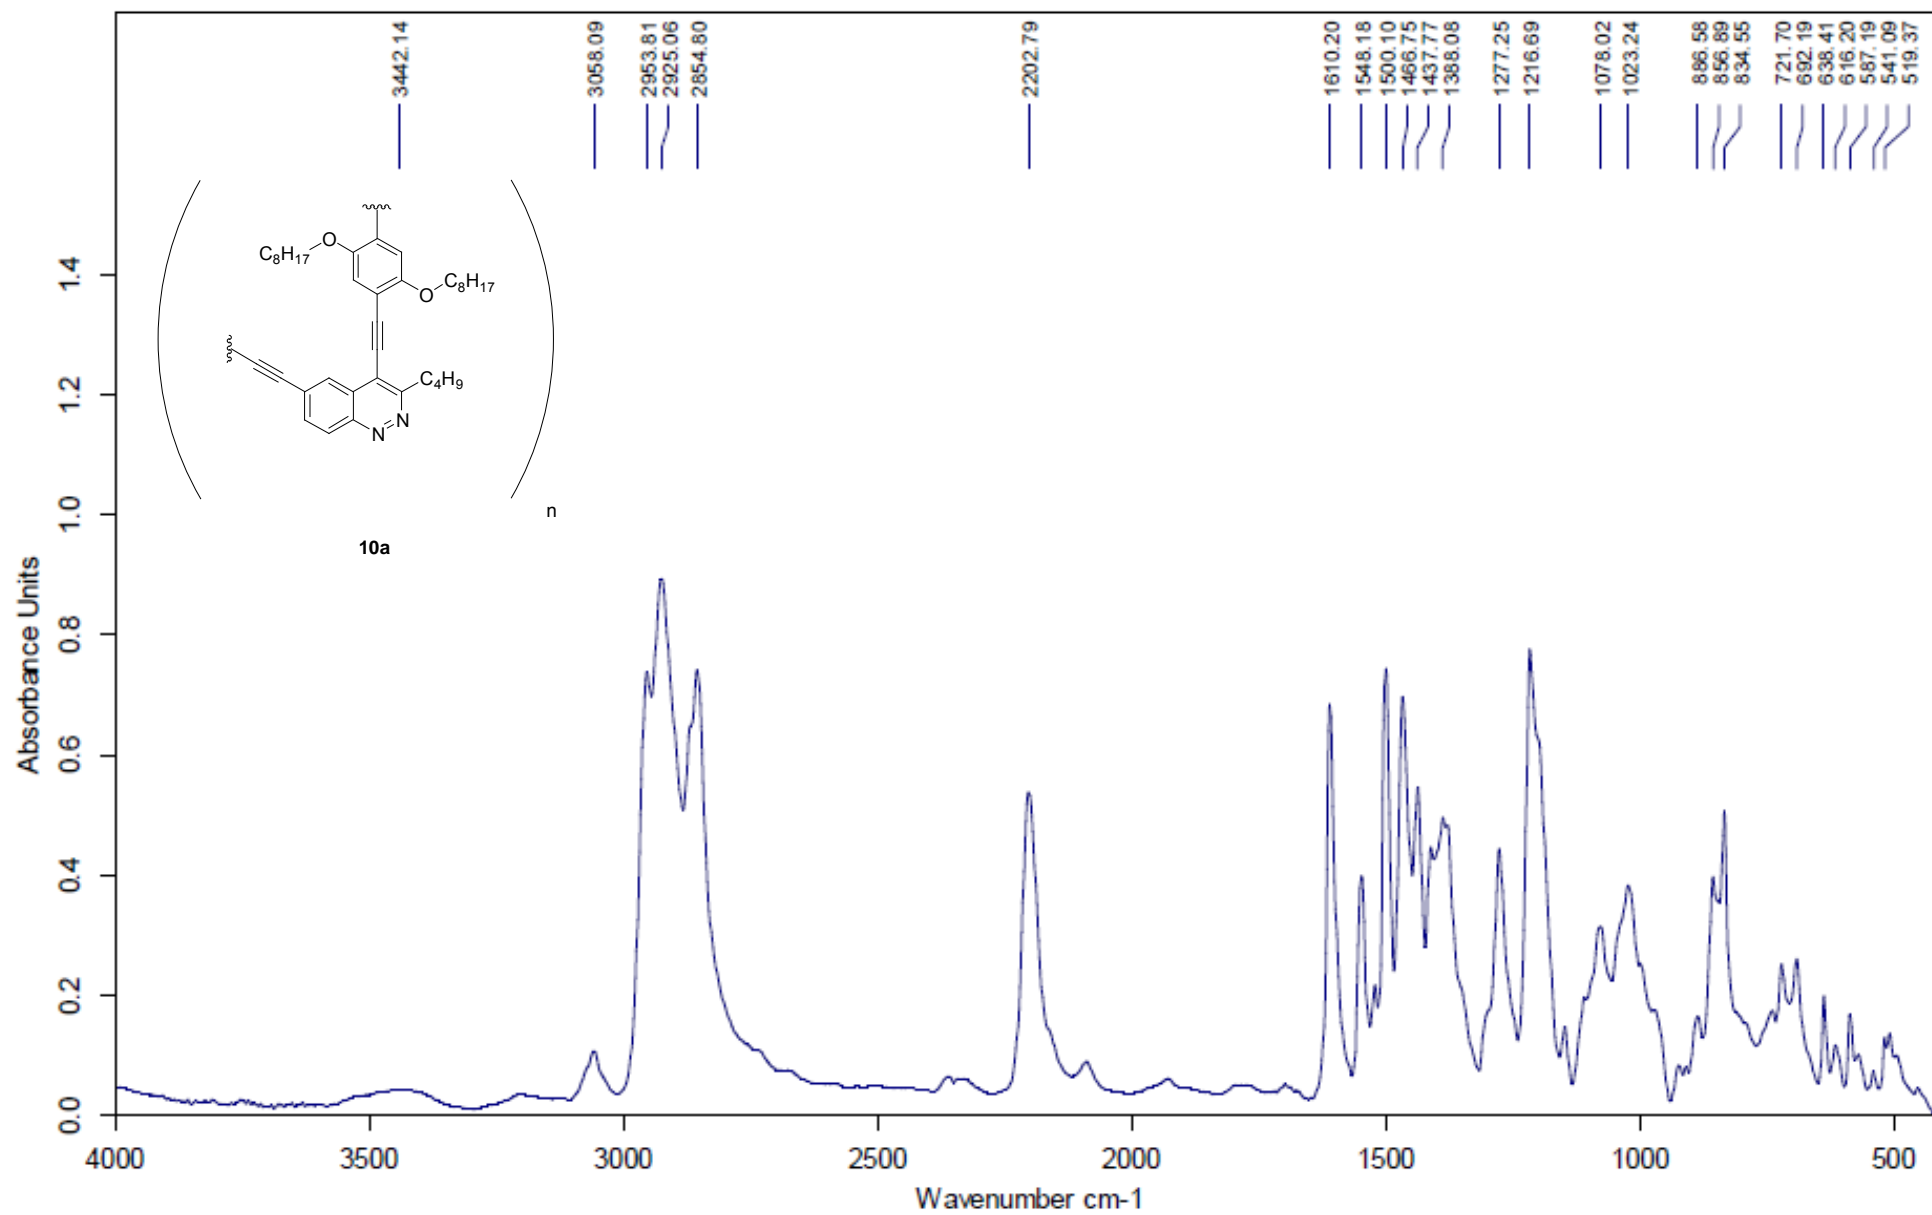

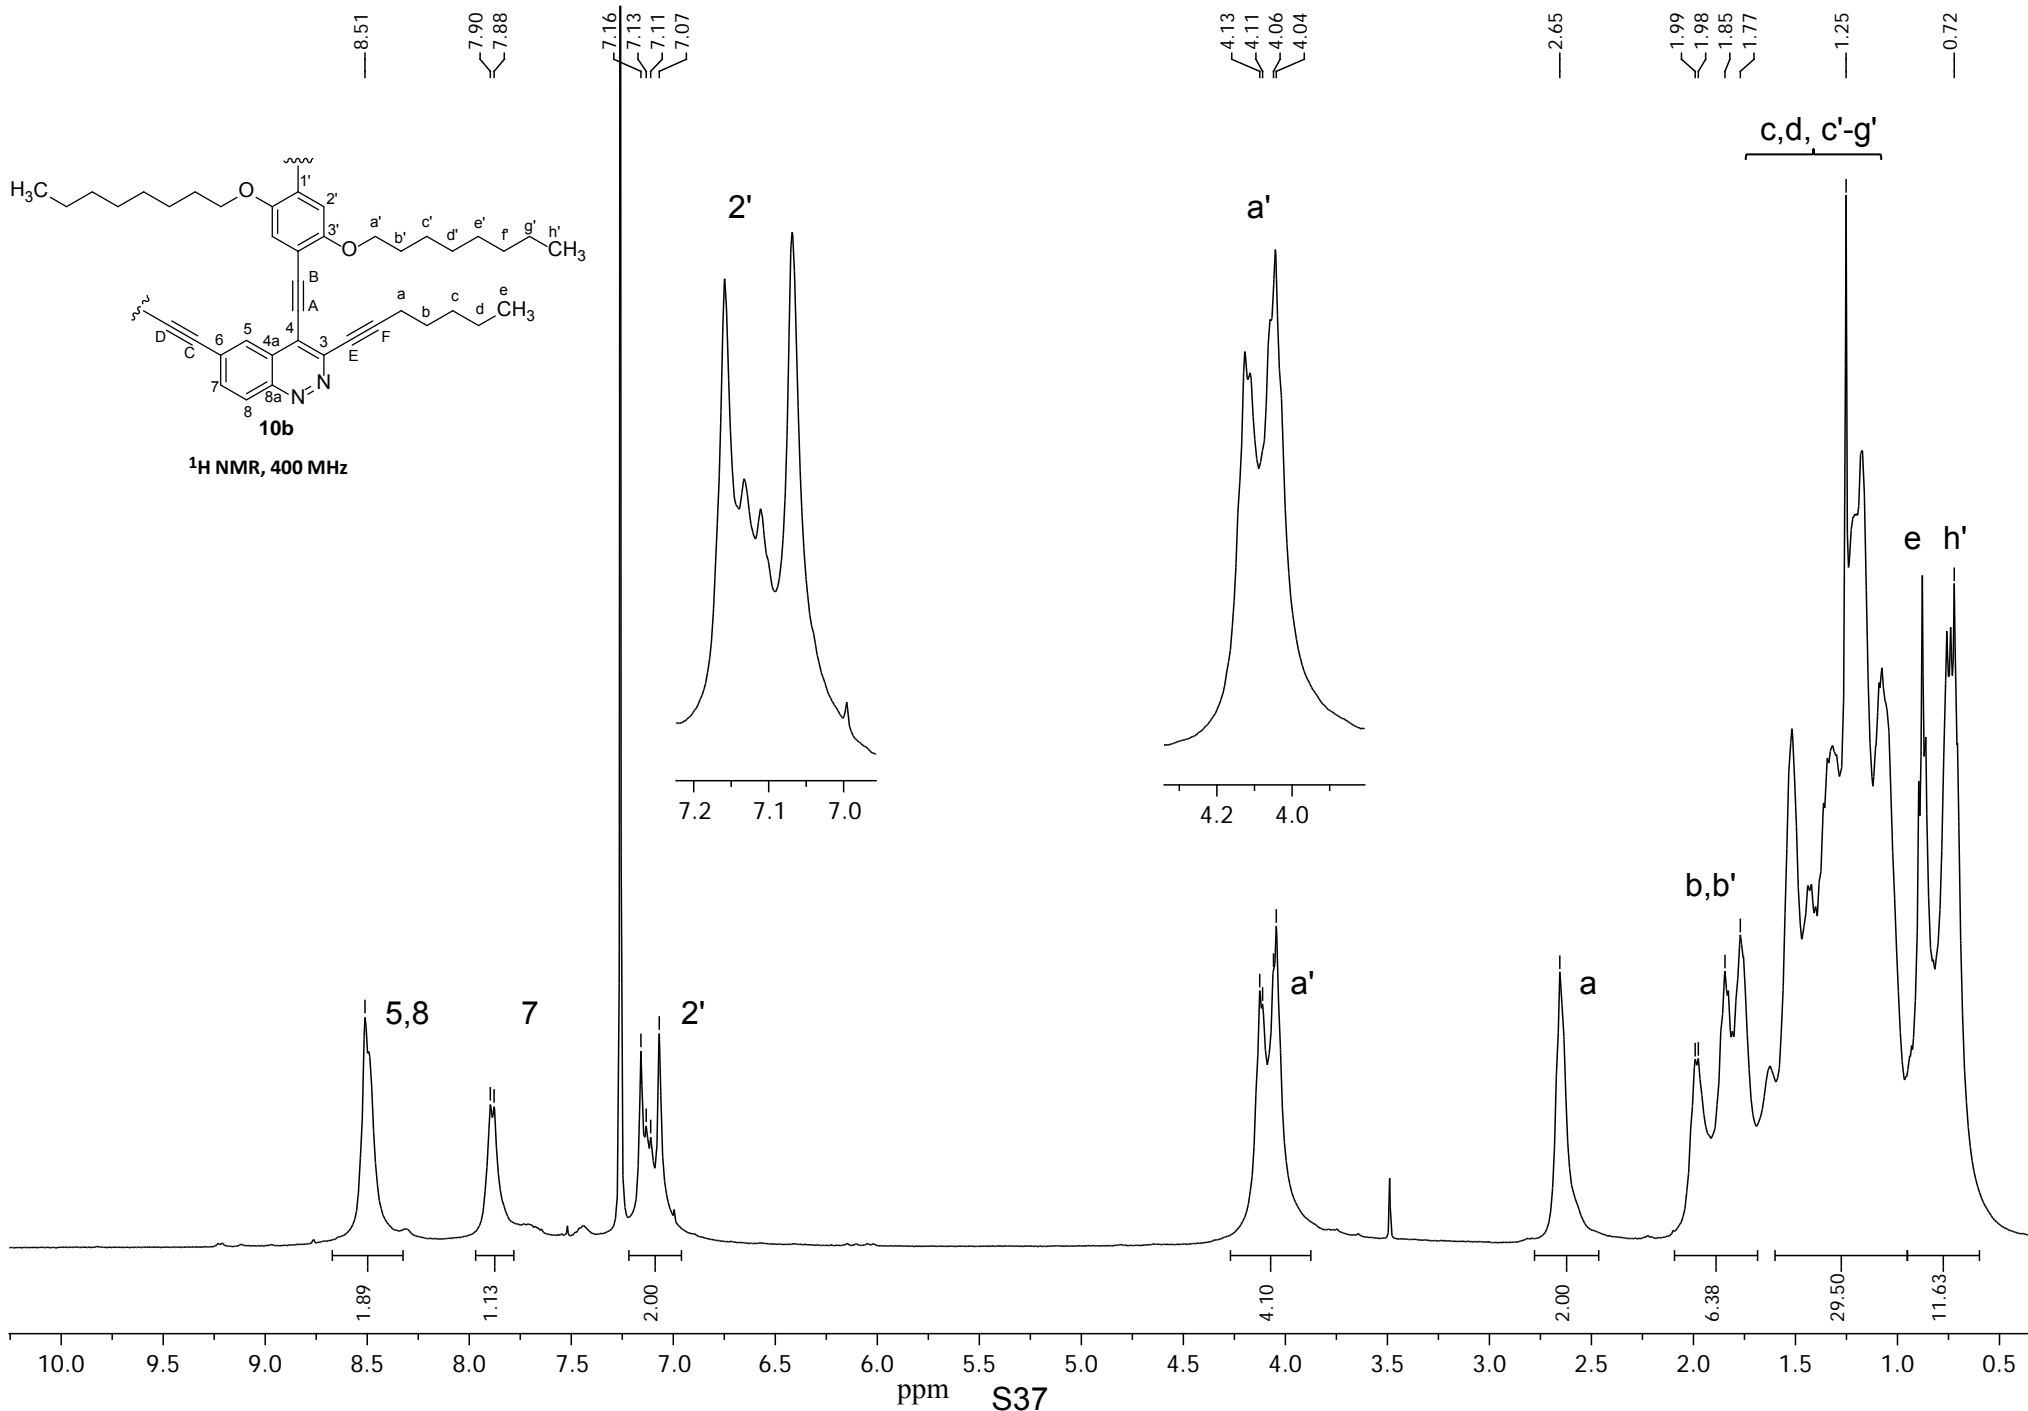

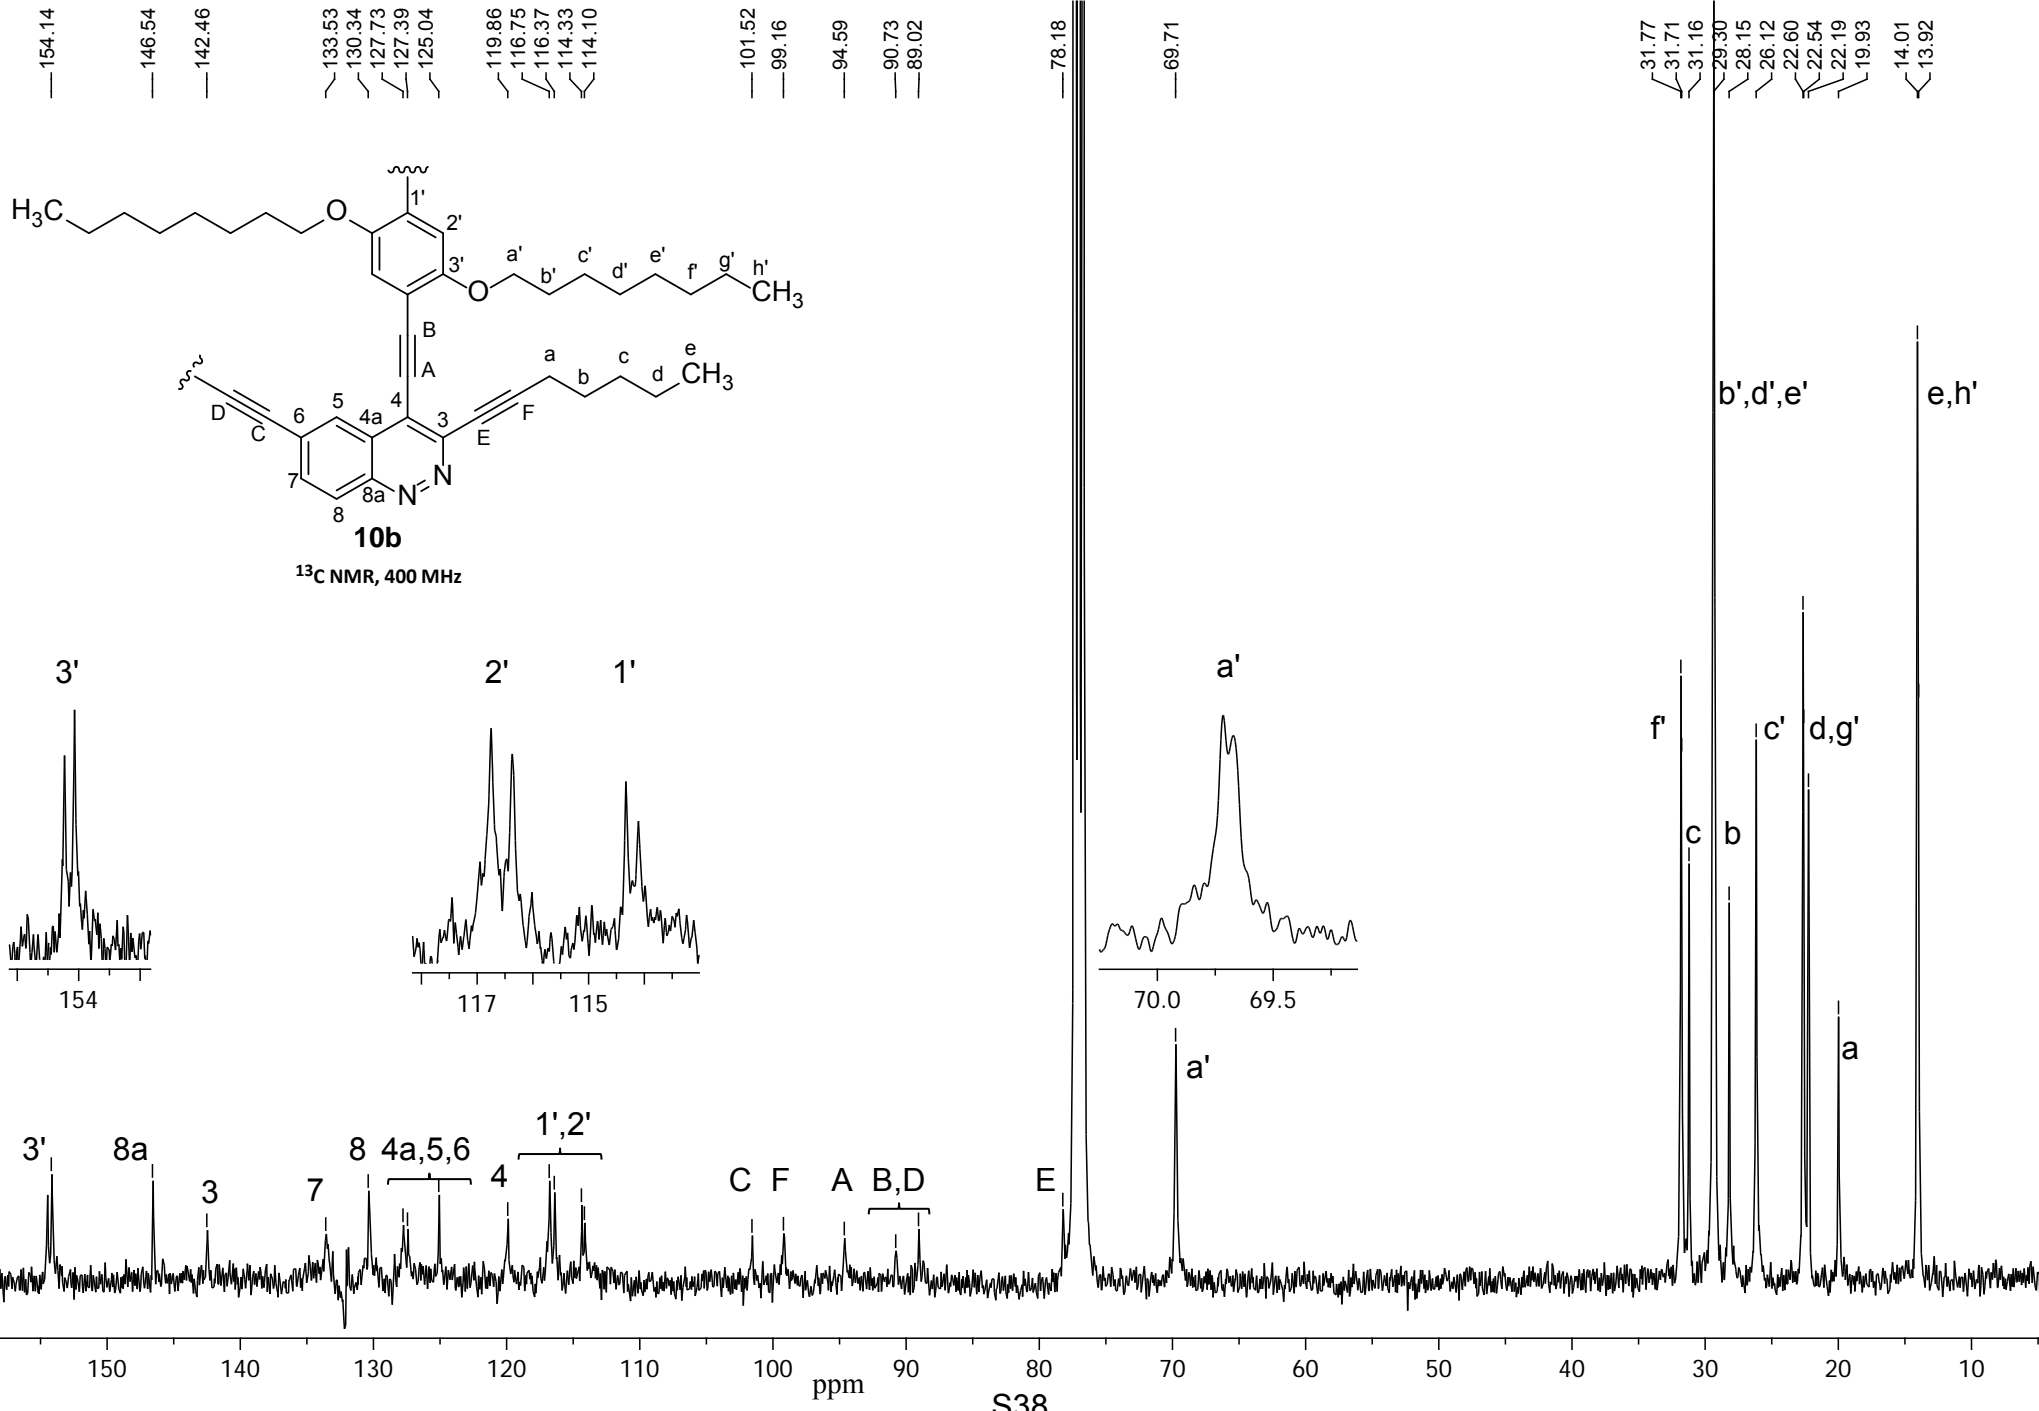

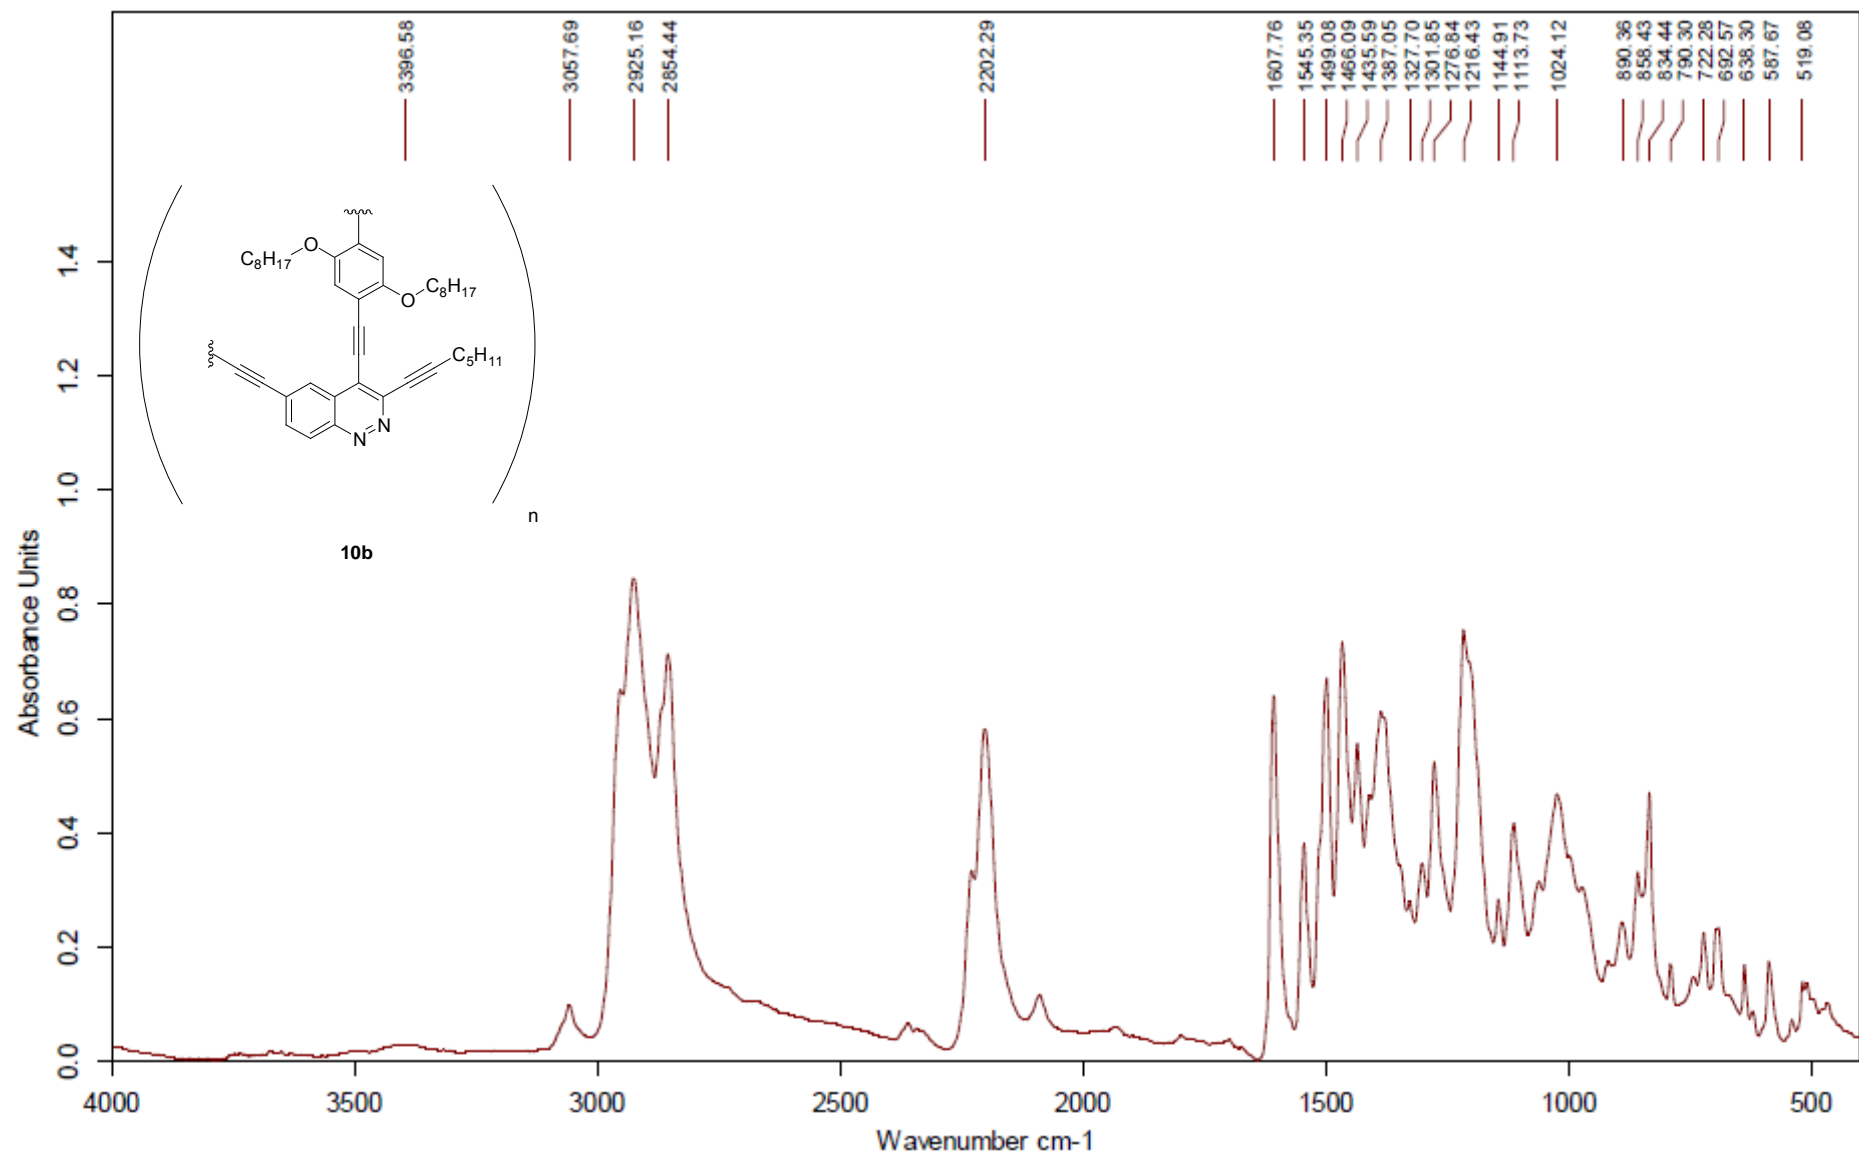

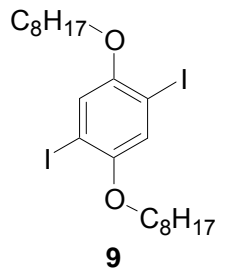

<sup>1</sup>H NMR, 400 MHz

7.17  
3.94  
3.92  
3.91  
1.83  
1.80  
1.76  
1.53  
1.49  
1.46  
0.91  
0.89  
0.87

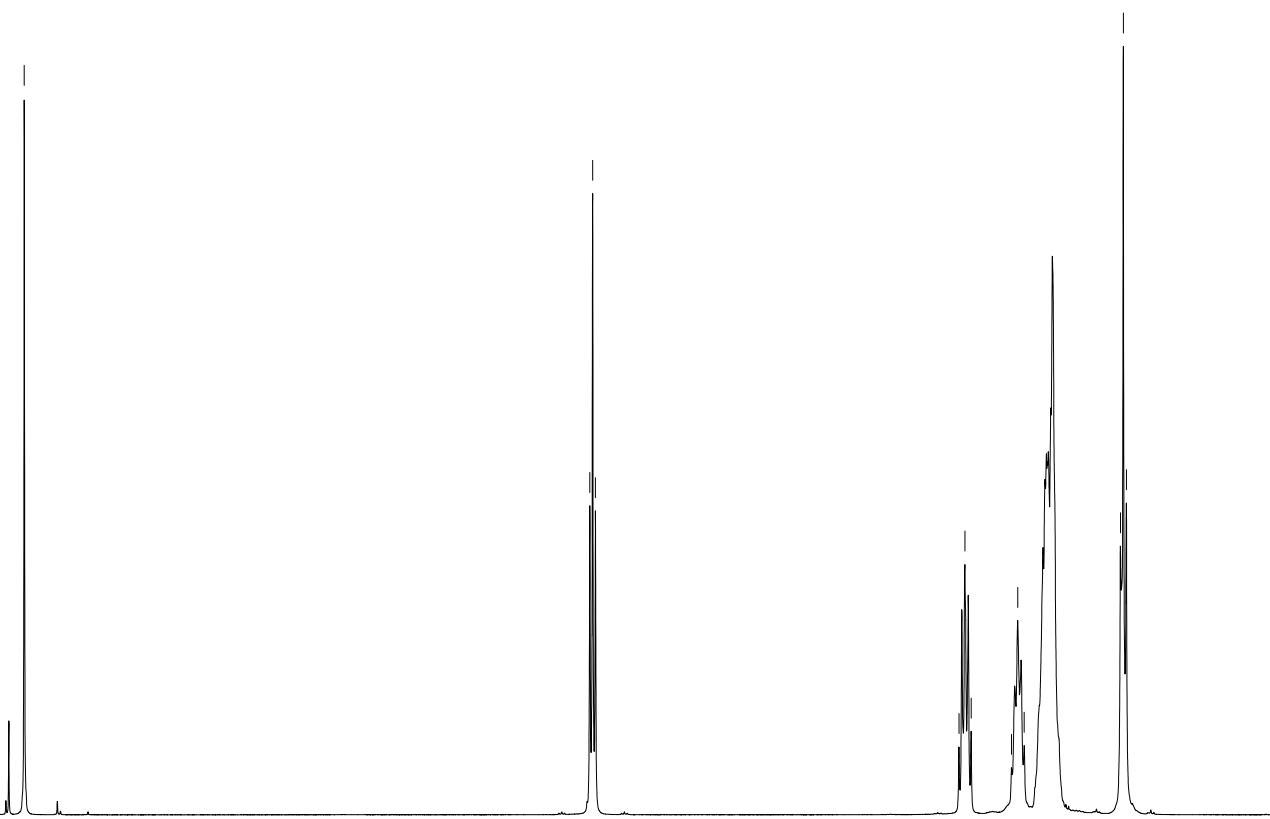

10.0  
ppm

5.0

0.0



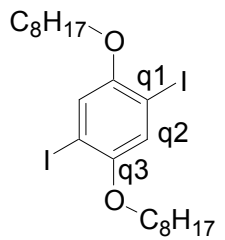

9  
<sup>13</sup>C NMR, 100 MHz

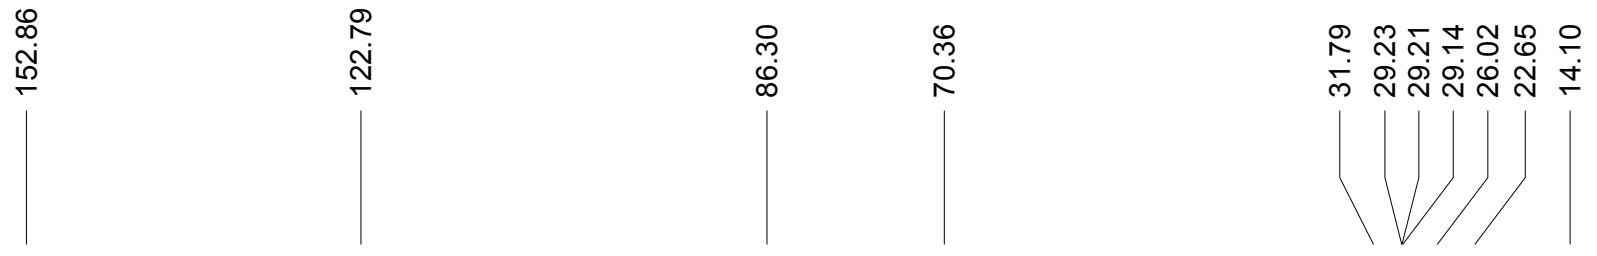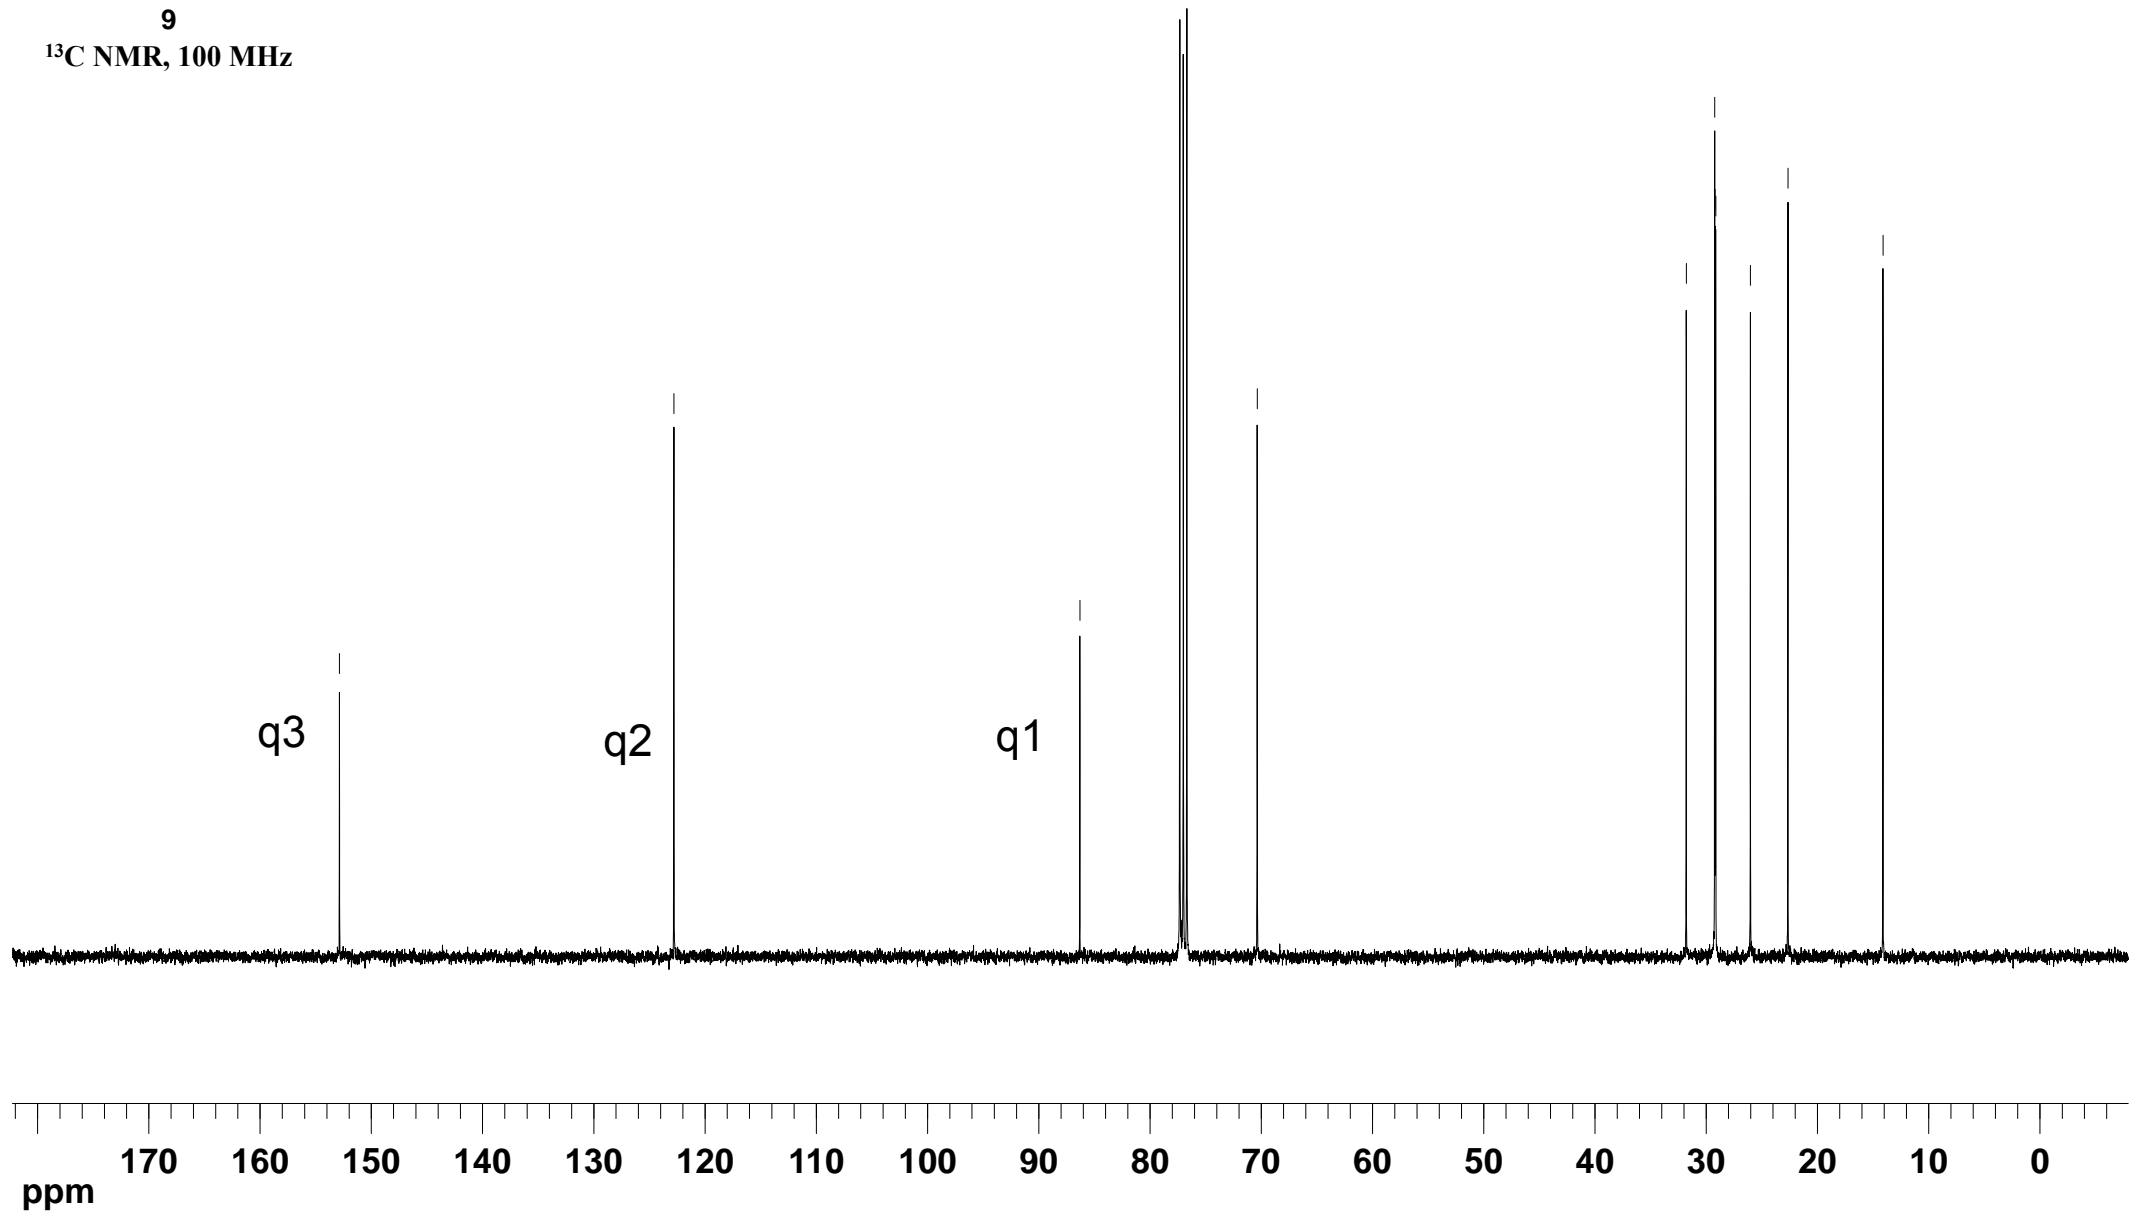

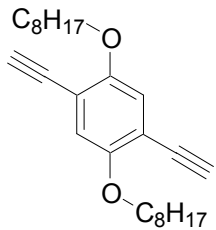

<sup>1</sup>H NMR, 400 MHz

6.95

3.97

3.33

1.80

1.46

1.28

0.88

2.00

4.08

1.85

4.10

4.28

16.78

6.25

ppm

5.0

0.0

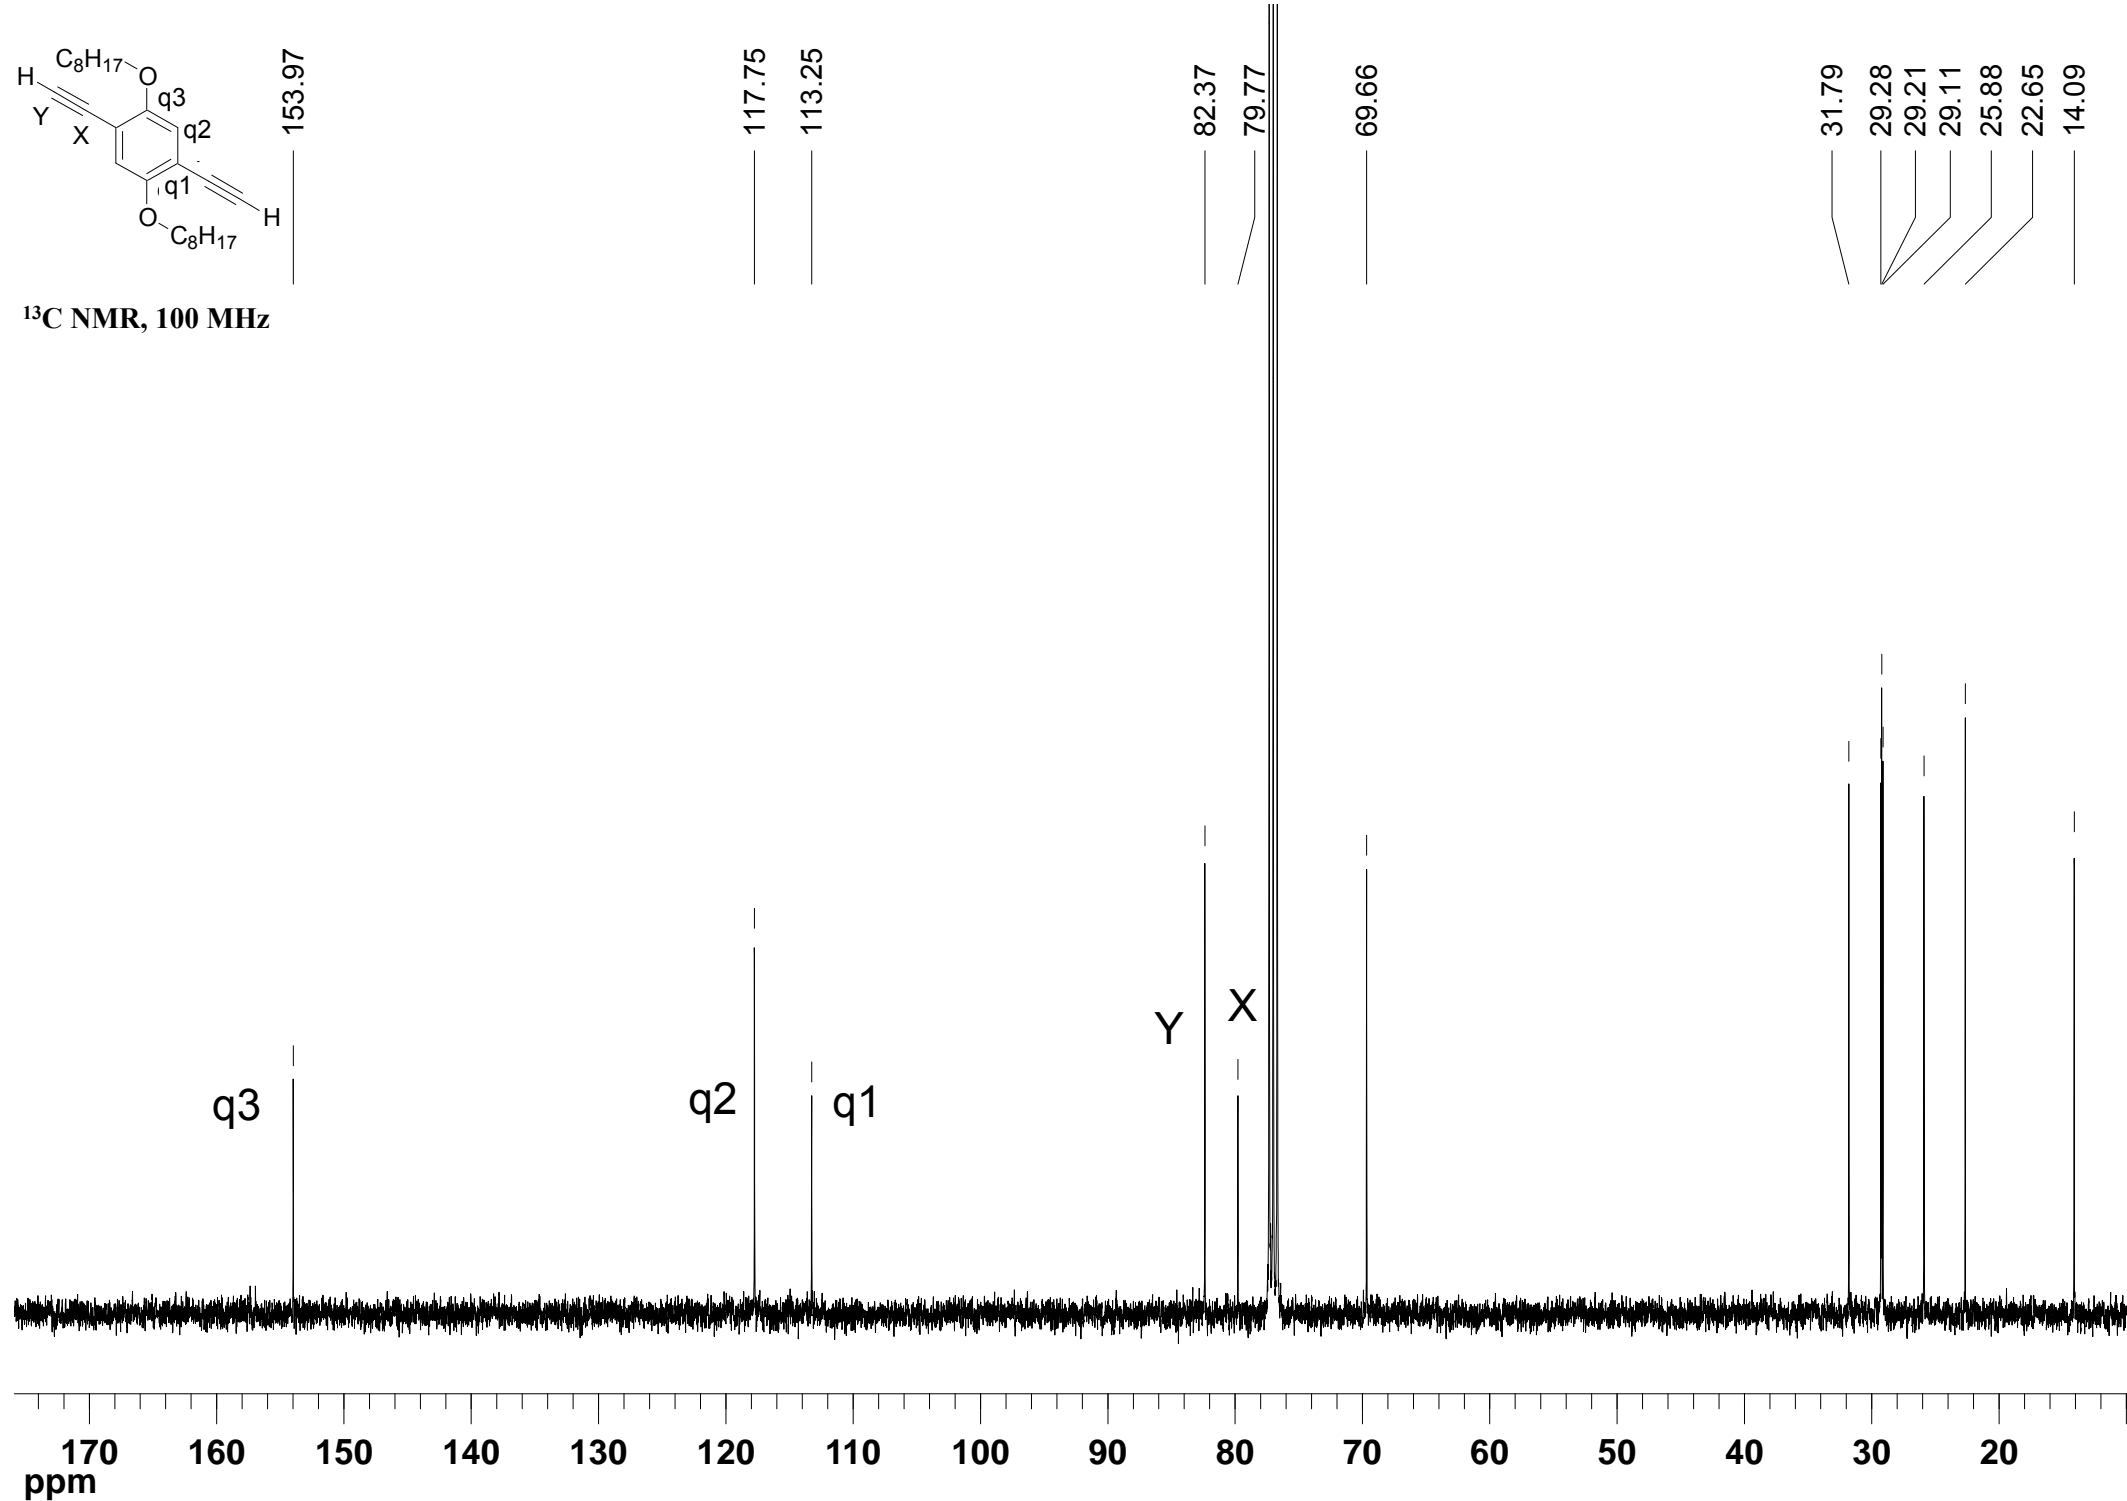

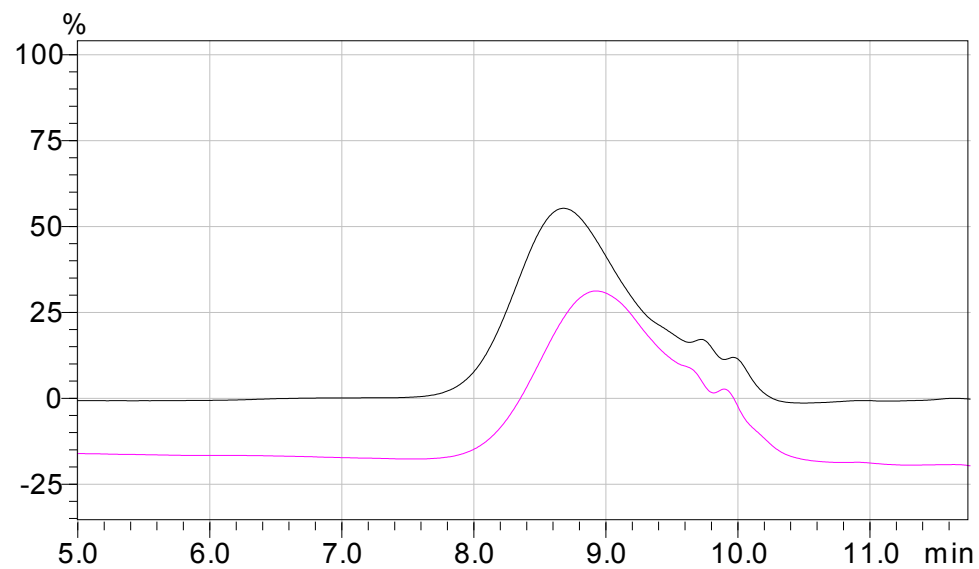

GPC analysis of PAEs **10a,b**. Elution curves for **10a** (black) and **10b** (pink) are shown

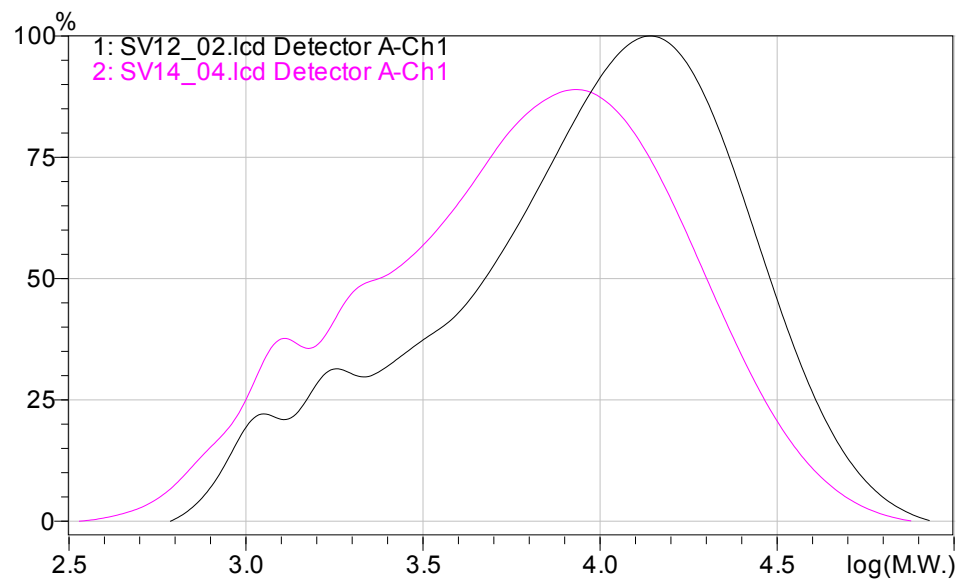

GPC analysis of PAEs **10a,b**. Mw distribution curves for **10a** (black) and **10b** (pink) are shown.
